# Supplementary material for: Noradrenaline release from the locus coeruleus shapes stress-induced hippocampal gene expression
Source: bioRxiv preprint, doi:10.1101/2023.02.02.526661, version 2 (2023-11-01)
Supplement: Supplementary Table 1 [file 526661_file02.xlsx]

## Sheet: Sheet1
This table shows the ranking result of all genes detected (highest to lowest) across experiments.
Gene	rank	index
Dio2	50	1
Ppp1r3c	264	2
Ppp1r3g	321	3
Sik1	2094	4
Tsc22d3	3419	5
Ppp1r3d	3562	6
F3	4372	7
Sertad1	5095	8
Nr4a1	5171	9
Timp3	5786	10
Clk4	6058	11
Rbm12b2	6602	12
RP23-15I21.8	6723	13
H3f3b	7101	14
Trib1	7701	15
Apln	7716	16
Plat	7732	17
Egr4	8013	18
Arc	8150	19
Fam78a	8202	20
Sgk1	8289	21
Otud1	8368	22
Ascl1	8539	23
Gadd45g	8616	24
Zfp36l2	8625	25
Plekho1	8663	26
Dchs1	8828	27
Cyr61	8999	28
Iqgap1	9080	29
Gpr61	9095	30
Hba-a1	9191	31
Midn	9282	32
Mgat2	9325	33
Csrnp1	9456	34
Klc4	9619	35
Kcnk4	9680	36
Lfng	9738	37
Arid5a	9847	38
Phf13	9959	39
Srfbp1	10205	40
Egr1	10271	41
Nwd1	10308	42
Fosb	10378	43
Vps13b	10438	44
Tob2	10524	45
Txnip	10657	46
Jmy	10695	47
Fam214a	10804	48
Junb	10947	49
Zfp146	11036	50
Zswim8	11171	51
Kat6b	11280	52
Klf6	11396	53
Trim28	11396	54
Ecm2	11567	55
Fam46a	11636	56
Dcun1d5	11678	57
Hes5	11697	58
Zfp948	11973	59
Zfp516	12046	60
Dst	12076	61
Spen	12077	62
Dhps	12131	63
Ldb1	12145	64
Oxld1	12184	65
Pvalb	12250	66
Ankrd54	12273	67
Fnbp4	12316	68
Dusp5	12350	69
Zfp36l1	12423	70
Spry4	12427	71
Cxcl12	12537	72
Slc9a8	12551	73
Hbb-bs	12561	74
Slit2	12576	75
Rasl11a	12681	76
Dxo	12716	77
Trim59	12739	78
Fat1	12742	79
Pik3c2a	12831	80
Sbds	12890	81
Errfi1	12900	82
Cd34	12989	83
Aatf	13025	84
AC163993.2	13030	85
Pnpla2	13034	86
Npas4	13170	87
Cep250	13288	88
Hba-a2	13355	89
Mafk	13441	90
Per1	13483	91
Zfp493	13537	92
Dhrs3	13559	93
Unc45a	13600	94
Ctdsp2	13660	95
Tdrp	13687	96
Taf9	13699	97
Nek10	13706	98
Mnt	13723	99
Adipor2	13759	100
Shtn1	13761	101
Pcdhga1	13773	102
Pdlim5	13920	103
Fstl4	13979	104
Tsc22d2	14074	105
Pde4d	14230	106
Tob1	14360	107
Hydin	14366	108
Pank4	14388	109
Zfp36	14473	110
Slc6a6	14498	111
Lcmt2	14511	112
Slc25a25	14665	113
Slc25a42	14668	114
Sdk2	14709	115
Mest	14757	116
Hbb-bt	14779	117
Pcgf3	14797	118
Irs2	14801	119
Nrbf2	14933	120
Sdccag8	14937	121
Myh11	15004	122
Jmjd8	15043	123
Hmgn1	15196	124
Taf5	15200	125
Rab11fip5	15201	126
Hes1	15224	127
Lamp5	15240	128
Nfkbid	15266	129
Nfil3	15274	130
Asah2	15284	131
Map4k5	15320	132
Ptch1	15338	133
Eef1akmt1	15395	134
Fryl	15458	135
Iqcc	15459	136
Pomt1	15489	137
Crlf3	15502	138
Rpp25l	15595	139
Pcdhb16	15615	140
Mlycd	15619	141
Traf7	15633	142
Hps5	15654	143
Adarb1	15666	144
Adal	15670	145
Flna	15695	146
Slc35c2	15703	147
Sstr3	15760	148
Adrb1	15805	149
Nectin1	15810	150
Dbndd2	15816	151
Nfrkb	15846	152
Nfix	15888	153
Zcchc16	15910	154
Gjb2	15915	155
Kcnj6	15915	156
Akna	15922	157
Htr1b	15924	158
Rcor3	15930	159
Arl5b	15932	160
Cited2	15943	161
Hus1	16026	162
Oxsr1	16051	163
Mcl1	16067	164
Tiparp	16075	165
Zbtb3	16100	166
Tbc1d9b	16122	167
Arl4d	16135	168
Irf2bp2	16148	169
Zfp874b	16158	170
Notch1	16179	171
Ogdhl	16195	172
Uqcrb	16203	173
Wdr92	16225	174
Bmp6	16227	175
Brdt	16247	176
Dffa	16262	177
Med27	16262	178
Mrs2	16272	179
Cfap46	16332	180
Stx5a	16335	181
Slitrk4	16360	182
Bbs4	16390	183
Pla2g15	16432	184
Slc7a11	16439	185
AC166332.1	16452	186
Pwwp2b	16454	187
Bhlhe40	16462	188
Zfp658	16477	189
Slc9a3r1	16490	190
Mrpl41	16493	191
Ncam2	16531	192
Zcchc3	16570	193
Egr2	16571	194
Pak1ip1	16607	195
Trim13	16667	196
Pcbd2	16668	197
Crkl	16674	198
Tmem254b	16675	199
Chrm3	16677	200
Nin	16710	201
Zscan25	16710	202
Pigx	16721	203
Srr	16754	204
Zfp958	16765	205
Apbb2	16769	206
RP23-355G16.8	16792	207
Rpp21	16847	208
Cfap65	16853	209
Leng9	16875	210
Wdfy1	16898	211
Ier5	16906	212
Itgb8	16909	213
Depdc5	16940	214
Ntm	16976	215
Pcdh1	17012	216
Papola	17040	217
Pkp4	17041	218
Sumf1	17047	219
Ints12	17056	220
Tfrc	17080	221
Zfp653	17082	222
Bet1	17085	223
Srsf7	17131	224
Apold1	17206	225
Ddx25	17272	226
Nav2	17283	227
Nr4a3	17283	228
Fbxo7	17328	229
Gskip	17329	230
Mzf1	17341	231
Plch1	17345	232
Uba5	17390	233
Tcaim	17396	234
Polr1a	17404	235
Kdm1a	17420	236
Marveld1	17421	237
Ccdc88c	17434	238
Pdk4	17438	239
Rab11fip2	17454	240
Celsr1	17535	241
Rbmxl1	17540	242
Nip7	17570	243
Fzd7	17610	244
Fat4	17648	245
Cebpg	17658	246
Atp5g2	17660	247
Aven	17682	248
Fbxo22	17689	249
Fzd2	17717	250
Nfat5	17735	251
Fxn	17741	252
Pcdhga7	17757	253
Ciart	17765	254
Mettl2	17769	255
Atp5sl	17772	256
Vps51	17781	257
Pacrg	17821	258
Sox9	17829	259
Fam63b	17846	260
Myo10	17851	261
Arrdc3	17918	262
Kcnma1	17950	263
Nptx2	17951	264
Rsrp1	17951	265
Cxadr	17963	266
Socs6	17991	267
Pcyox1l	17995	268
Rsrc2	17997	269
Cwc25	18038	270
Pdgfra	18066	271
Dusp6	18094	272
Rbm12b1	18094	273
Ptprb	18097	274
Aldh7a1	18104	275
Pcsk7	18116	276
Tchp	18194	277
Ip6k2	18201	278
Kdelc1	18214	279
Sox8	18238	280
Fndc3b	18254	281
Rbm24	18258	282
Slc8a3	18263	283
Arv1	18268	284
Fh1	18279	285
Rps15	18295	286
Uvrag	18300	287
Fgfr3	18309	288
Ckmt1	18328	289
Tnfrsf11a	18340	290
Adamts1	18369	291
Arl6ip1	18372	292
Fastkd5	18385	293
Smc6	18392	294
Tbc1d5	18415	295
Neto1	18460	296
Zfp335	18480	297
RP24-77E13.10	18490	298
Mynn	18505	299
Psenen	18509	300
Eea1	18522	301
Wls	18526	302
Cul2	18529	303
Slc39a7	18529	304
Pnrc1	18532	305
Fzd1	18542	306
Trib2	18556	307
Zc3h14	18582	308
Snx22	18628	309
Fem1c	18631	310
Cmah	18633	311
Brd8	18636	312
Entpd4	18637	313
Cx3cr1	18673	314
Zfp235	18673	315
Lonrf1	18699	316
Spns2	18735	317
Llph	18753	318
Cwc22	18760	319
Plcd4	18764	320
Gemin8	18765	321
Bola2	18767	322
H2-Ke6	18780	323
Slc25a14	18802	324
Zfp81	18805	325
Cdh22	18810	326
Mpi	18822	327
Zfp120	18827	328
Mfsd2a	18833	329
Ier2	18836	330
Traip	18847	331
Asphd2	18853	332
Taf3	18854	333
Sulf2	18861	334
RP24-258O12.2	18872	335
Apol8	18876	336
Zfp748	18903	337
Ndc1	18908	338
Atad2b	18912	339
Lrp2	18917	340
Setd5	18925	341
Map1lc3b	18934	342
Ercc5	18935	343
Kcna2	18938	344
Ptpn14	19048	345
Slbp	19051	346
Nptxr	19066	347
Eif1b	19068	348
Uros	19078	349
Map4k2	19089	350
RP23-407H16.1	19091	351
Cryl1	19098	352
Kcnj2	19104	353
Robo1	19116	354
Acot13	19127	355
RP23-122F3.1	19132	356
Thbs4	19139	357
Prkab2	19141	358
Topors	19153	359
Pald1	19157	360
Tbc1d19	19167	361
Rundc3b	19169	362
Rrs1	19177	363
Ccl27a	19206	364
Dzip3	19219	365
Chd9	19245	366
Dscaml1	19250	367
Clk1	19254	368
Naga	19302	369
Gng10	19313	370
Eif3i	19317	371
Msh6	19327	372
Nid2	19329	373
Stc2	19332	374
Nup35	19348	375
Tmem150c	19349	376
Gatb	19354	377
Akap2	19358	378
Lrrc49	19367	379
Nprl3	19368	380
Cdkn1a	19380	381
Fstl1	19408	382
Med20	19414	383
Slc16a7	19430	384
Zbed4	19437	385
Ergic2	19453	386
Dlx5	19454	387
Gusb	19478	388
Rasl11b	19490	389
Col19a1	19491	390
AC124713.2	19494	391
Arhgap17	19495	392
Shc2	19501	393
Rfwd3	19513	394
Glmp	19535	395
Rprd2	19539	396
Pcsk5	19549	397
Lmf1	19556	398
Map3k2	19562	399
Cnot11	19567	400
Acbd3	19579	401
Zfp938	19595	402
Rnf165	19603	403
Pla2g6	19605	404
Lcor	19627	405
Snrpb	19648	406
Arntl2	19654	407
Rnaseh2b	19655	408
Ldah	19683	409
Rer1	19685	410
Zcchc8	19688	411
Prrc2b	19689	412
Senp8	19690	413
U2af1	19702	414
Rfng	19712	415
Camk1d	19723	416
Frs3	19723	417
Rassf3	19739	418
Erap1	19754	419
Vmp1	19756	420
Lars2	19778	421
Zscan29	19795	422
Chst15	19797	423
Gramd1a	19803	424
Fastk	19809	425
Ndufaf4	19829	426
Rpf2	19861	427
Rpl35a	19861	428
Ptprk	19862	429
Nav1	19875	430
Hps4	19882	431
Aplf	19893	432
Colgalt1	19894	433
Rit1	19908	434
Ctsc	19912	435
Slitrk1	19931	436
Esr1	19944	437
Zfp59	19944	438
Etfa	19948	439
Slc5a3	19963	440
Nynrin	19970	441
Lipg	19972	442
Arsk	19981	443
Yod1	20029	444
Fam84b	20048	445
Cyyr1	20054	446
Arrdc4	20055	447
Kcnh1	20058	448
Fbxl20	20069	449
Mkl2	20070	450
Trank1	20074	451
Fam124a	20077	452
Ufsp2	20078	453
Mbtps1	20086	454
Wrb	20099	455
Zfp12	20104	456
Rptor	20109	457
Gpc4	20113	458
Prox2	20113	459
Ets2	20123	460
Cdc42ep2	20128	461
RP24-200D3.4	20129	462
Etl4	20139	463
Gal3st3	20139	464
Trpm7	20175	465
Snrpe	20180	466
Slc2a1	20186	467
Tiprl	20186	468
Cpne8	20220	469
Edrf1	20246	470
Cul7	20251	471
Carnmt1	20254	472
Plekhf1	20254	473
Rbak	20264	474
Adhfe1	20268	475
Gtf2h4	20270	476
Setdb1	20314	477
Lancl3	20316	478
Iqce	20333	479
Zfp949	20334	480
Sox18	20355	481
Bbip1	20363	482
Cnnm3	20398	483
Mon1b	20399	484
Fbxw9	20408	485
Crybg3	20411	486
Ubap1	20439	487
Trpc5	20454	488
Ninj1	20459	489
Brix1	20531	490
Ikzf2	20534	491
Suco	20535	492
Ccdc93	20554	493
Vps13d	20568	494
Rock1	20578	495
Bmp1	20596	496
Tpr	20598	497
Homer1	20612	498
Dusp7	20621	499
Inpp5d	20623	500
Psd2	20629	501
Akap10	20635	502
Plekhg5	20645	503
Mllt4	20663	504
Sltm	20681	505
Tnfrsf25	20688	506
Podxl	20690	507
Rnf19a	20690	508
Rims1	20702	509
Gpr3	20707	510
Fdft1	20726	511
Lin37	20729	512
Lamc1	20738	513
Gabrg3	20768	514
Tomm22	20776	515
Lrrn1	20786	516
Adam22	20804	517
Mcu	20809	518
Gabpb2	20811	519
Rcan1	20811	520
Supt4a	20812	521
Pou3f2	20826	522
Tnrc18	20829	523
Myc	20838	524
Gnb5	20855	525
Zkscan8	20862	526
Btbd2	20871	527
Pdcd4	20894	528
Pnkp	20905	529
Slc13a5	20909	530
Lactb2	20923	531
Bsn	20929	532
Osgin2	20929	533
Krr1	20935	534
Gm9747	20940	535
Cdk13	20945	536
Wdr41	20952	537
Galnt15	20954	538
Rasa2	20971	539
Utrn	20973	540
Ogdh	20989	541
Pdcd6	20991	542
Ahsa2	21017	543
Nudt14	21029	544
Rps19bp1	21039	545
Znhit6	21042	546
Myo6	21048	547
Insm1	21063	548
Morn4	21063	549
Vbp1	21068	550
Ibtk	21073	551
Fam184b	21077	552
Nhp2	21081	553
Zfx	21092	554
Gpr85	21097	555
Dars2	21106	556
Ilkap	21129	557
N4bp2	21132	558
Dtx3l	21134	559
Nme1	21135	560
Rps18	21137	561
Fgd4	21139	562
Luc7l3	21141	563
Fbln2	21143	564
Mcm9	21145	565
Zfp418	21146	566
Epm2a	21158	567
Rpl32	21166	568
Kcnc1	21169	569
Necab2	21185	570
Tnpo1	21185	571
Chst1	21194	572
Abt1	21215	573
Vat1l	21244	574
Atp13a3	21245	575
Plekhg1	21253	576
Ints11	21258	577
Hyls1	21302	578
Fbxl2	21303	579
Naa16	21306	580
Ncoa6	21312	581
Lama5	21331	582
Dnajb5	21332	583
Psmd13	21332	584
Ctxn2	21335	585
Zdhhc9	21337	586
Tbrg1	21354	587
Kif5a	21359	588
AC125061.1	21360	589
Tmem110	21365	590
Fam78b	21372	591
Gadd45b	21375	592
Rfx7	21378	593
Atxn7l2	21380	594
Csrp1	21384	595
Arhgap29	21387	596
Trim33	21389	597
Rai1	21393	598
Washc3	21406	599
Adcy7	21407	600
Prmt6	21421	601
Ufc1	21431	602
Iffo1	21432	603
Adprhl2	21433	604
mt-Nd6	21435	605
Rps14	21453	606
Inhba	21458	607
Hcfc2	21459	608
Wdr4	21459	609
Lrp6	21478	610
Tmem178b	21479	611
Pcdhgb1	21526	612
Gpr34	21528	613
Cacna1e	21553	614
Itgam	21553	615
Hhipl1	21561	616
Zcchc17	21573	617
Rpgrip1l	21575	618
Zfp189	21576	619
Srsf5	21594	620
RP23-109A22.2	21595	621
Mchr1	21598	622
Prr18	21629	623
Trim41	21633	624
Fgd2	21634	625
Ppwd1	21636	626
Zfand2b	21641	627
Tmem108	21656	628
Rprd1b	21657	629
Exoc4	21661	630
Grid1	21666	631
Rit2	21667	632
Klf2	21677	633
Lypd1	21680	634
Nostrin	21680	635
Fos	21689	636
Fus	21689	637
Enoph1	21699	638
Slc16a2	21706	639
Trmt5	21709	640
Zmat4	21710	641
Rbm14	21712	642
Pfas	21723	643
Baz2b	21726	644
Aimp2	21733	645
Amz2	21740	646
Phyhd1	21743	647
Cfb	21755	648
Tll1	21774	649
RP23-242C19.7	21787	650
Col1a1	21790	651
Sarnp	21791	652
Gga1	21817	653
Mcm3ap	21821	654
Slx4ip	21826	655
Psmf1	21829	656
Cdc5l	21832	657
Nedd9	21833	658
Fubp3	21842	659
Naca	21844	660
Zfp867	21844	661
B3glct	21852	662
Mis12	21878	663
Ddx47	21883	664
Bag5	21886	665
Foxo1	21888	666
Cacng7	21891	667
Lhfp	21897	668
Pcdh20	21897	669
Ndn	21900	670
Lrrc59	21906	671
Tmem28	21909	672
Coil	21912	673
Pcdh15	21921	674
Bgn	21930	675
Psmc1	21944	676
RP24-482A24.5	21945	677
Decr2	21947	678
Tmem39a	21947	679
Rnaseh2a	21966	680
Dock8	21972	681
Pcdhb10	21974	682
Amigo3	21985	683
Gnal	21990	684
Colec12	21995	685
Atp8a2	22009	686
Rpl5	22031	687
Csnk2a2	22032	688
Slc38a6	22035	689
Prkg1	22039	690
Nkain1	22046	691
Dusp18	22054	692
Vps26a	22066	693
Hdac2	22077	694
Fdps	22086	695
Sdccag3	22088	696
Znrf1	22089	697
Fam117a	22093	698
Scara3	22103	699
Slitrk3	22119	700
Set	22121	701
Mavs	22126	702
Hipk3	22131	703
Rpl13a	22134	704
Psmb4	22141	705
Ubash3b	22146	706
Kbtbd8	22151	707
Cd302	22155	708
Adamts17	22157	709
AC157667.1	22165	710
Tgfbr1	22178	711
Gla	22186	712
Zkscan3	22190	713
Slc26a6	22191	714
Pglyrp1	22194	715
Slc6a20a	22201	716
Hmbox1	22204	717
Ctu1	22208	718
Zbtb22	22220	719
Hdac6	22226	720
Kiss1r	22230	721
RP23-372O9.2	22232	722
Celsr3	22244	723
Pcbp3	22247	724
Rybp	22260	725
Kcnv1	22268	726
Ednrb	22269	727
Mob3a	22283	728
Fhl1	22288	729
Trip4	22290	730
Strap	22293	731
Adcy2	22295	732
Sac3d1	22298	733
Rai14	22300	734
Rrp1b	22302	735
Mical3	22306	736
Ccdc58	22308	737
Zfp180	22308	738
Rspo3	22315	739
Commd6	22324	740
Ptchd4	22330	741
Trpm2	22336	742
Gm10600	22342	743
Sfxn1	22348	744
Dnajc24	22358	745
Lrrc24	22361	746
Kcna1	22368	747
Aoc2	22370	748
Ifrd2	22379	749
Slc35a1	22382	750
Piezo1	22397	751
Stag1	22398	752
Nrp2	22405	753
RP23-353K7.9	22407	754
Ank1	22408	755
Srsf11	22412	756
Zfp511	22414	757
Sos2	22423	758
Slc35a2	22427	759
Cdc26	22431	760
Traf4	22434	761
Tnrc6c	22436	762
RP24-159C12.8	22437	763
Plpp7	22442	764
Bambi	22446	765
RP23-167G19.12	22447	766
Zfp946	22447	767
Cebpd	22460	768
Kdm3b	22463	769
Itm2c	22464	770
Cic	22471	771
Zfp712	22483	772
Rnf8	22491	773
Ninl	22499	774
Tm7sf2	22524	775
Bccip	22533	776
Rdh10	22552	777
Trio	22552	778
Acer3	22554	779
Zfp322a	22555	780
Smco3	22556	781
Mospd3	22566	782
Efna3	22579	783
Actl6a	22583	784
Comt	22587	785
Aff1	22599	786
Pdia4	22599	787
Pgam2	22604	788
Tmem251	22606	789
Ndel1	22612	790
Whrn	22627	791
Cul4a	22636	792
Mif4gd	22638	793
Fgf2	22646	794
Slc7a1	22646	795
Zfp112	22657	796
Ppfia4	22662	797
Rasd1	22662	798
Spp1	22663	799
Mcf2l	22668	800
Furin	22670	801
Amph	22682	802
Dnmt3a	22688	803
Rtel1	22700	804
Pcdha4	22707	805
Asf1a	22724	806
Zc3h6	22724	807
Mxi1	22729	808
Kit	22735	809
Acot11	22737	810
Mxd4	22740	811
Ahr	22748	812
Tubgcp4	22750	813
Amigo2	22751	814
Uhrf1bp1l	22754	815
Prcc	22755	816
Plxnd1	22756	817
Dscam	22758	818
Kansl2	22763	819
Surf1	22763	820
Asb8	22776	821
Dpf2	22787	822
Eif3g	22787	823
Dusp4	22790	824
Ctps	22794	825
Phldb2	22797	826
Gpatch4	22804	827
Pcgf6	22817	828
Natd1	22821	829
Zfp866	22822	830
Phlpp2	22826	831
AC162528.2	22828	832
Senp7	22828	833
RP23-314A12.1	22829	834
Pou2f1	22851	835
Pde7a	22854	836
Vopp1	22854	837
Cep350	22856	838
Cirbp	22865	839
Pepd	22865	840
Wdr55	22884	841
Lurap1l	22893	842
Mycn	22896	843
Mageh1	22899	844
Eef1g	22900	845
Lsm12	22904	846
Atp5e	22907	847
Dpp3	22911	848
Fah	22911	849
Pfn1	22916	850
Rps27a	22922	851
Celsr2	22925	852
Acbd4	22938	853
Zfp687	22938	854
Zbtb43	22948	855
AC121838.2	22954	856
Rbm33	22960	857
Chrna7	22975	858
Pan2	22978	859
Rev3l	22985	860
Copa	22993	861
Top1	23003	862
Xpc	23006	863
Bicdl1	23023	864
Rin2	23025	865
Slc16a11	23032	866
Dnajc8	23034	867
Rnf123	23040	868
RP23-156N21.2	23045	869
Cdk12	23056	870
Prkar2b	23060	871
Atl1	23062	872
Cast	23077	873
Blvra	23081	874
Tpra1	23084	875
Prpf19	23090	876
Gpx3	23091	877
Fmnl3	23092	878
Hsd3b7	23096	879
Zbtb17	23100	880
Psmg2	23123	881
Capn10	23131	882
Zfp142	23140	883
Gm20721	23149	884
Snx6	23153	885
Kctd20	23161	886
Ercc8	23163	887
Nfatc1	23163	888
Sufu	23171	889
Fam118a	23175	890
Acta2	23177	891
B3galt2	23179	892
Rhobtb3	23184	893
Usp24	23190	894
Myof	23192	895
Ptpre	23193	896
Pygo2	23195	897
Rgs3	23204	898
Wdr19	23222	899
Psd3	23223	900
Ift122	23227	901
Fan1	23228	902
Psmb6	23231	903
Pcdh10	23246	904
Qtrtd1	23262	905
Dnah9	23270	906
Tnr	23276	907
AC114920.2	23279	908
Krcc1	23284	909
Ovca2	23287	910
Tac1	23287	911
Celf2	23289	912
Rpf1	23296	913
Elmsan1	23297	914
Dnajc1	23319	915
Stmn1	23325	916
Ap2m1	23326	917
Chrm4	23330	918
Pofut2	23334	919
Lias	23348	920
Lsm11	23353	921
Exosc9	23356	922
Hsbp1	23382	923
Cacna1g	23393	924
Mal	23407	925
Kcnd1	23412	926
Dnaaf2	23429	927
Eaf1	23436	928
Baz2a	23439	929
Tigd5	23442	930
Mob1a	23446	931
Mydgf	23454	932
Ssrp1	23454	933
Fbxl6	23460	934
Snx11	23483	935
Pde3a	23487	936
Pigz	23489	937
Ranbp6	23491	938
Arhgap26	23493	939
B4galnt1	23495	940
Ppt2	23507	941
RP23-24J10.5	23509	942
Ctsb	23516	943
Cpsf4	23519	944
Plekha6	23522	945
Eif3d	23524	946
Ank2	23531	947
Epb41l5	23532	948
Ndufb8	23532	949
Flot2	23544	950
Exd2	23547	951
Btg2	23548	952
Tmem25	23556	953
Ing4	23558	954
Fpgt	23561	955
Jrk	23562	956
Pstk	23570	957
Atrnl1	23571	958
RP23-32E20.1	23572	959
Trpm3	23572	960
Stard3nl	23589	961
Itsn1	23593	962
Polr3h	23596	963
RP23-330D3.3	23603	964
Sugp1	23608	965
Gm21093	23609	966
Gtpbp6	23611	967
Htr1a	23614	968
Asb3	23615	969
Clk2	23619	970
Thap2	23624	971
Gdf11	23630	972
Mettl4	23630	973
Ermp1	23633	974
Macf1	23639	975
Pdxdc1	23642	976
l7Rn6	23651	977
Pdia3	23656	978
Dnajb1	23657	979
Tomm40l	23665	980
Sbf2	23666	981
Nup62	23667	982
Pdzd11	23667	983
Srgap3	23675	984
Poldip2	23678	985
Rnf139	23681	986
Stk4	23687	987
RP23-42N14.3	23690	988
Apip	23702	989
Gpnmb	23703	990
Foxj1	23704	991
Slitrk5	23718	992
Tex261	23718	993
Inhbb	23719	994
Nnat	23722	995
Zmiz1	23723	996
Mrpl45	23732	997
Snrnp40	23734	998
Zfml	23735	999
Anks1	23746	1000
Bnip2	23747	1001
Polr1b	23757	1002
Pard6a	23762	1003
Mtpap	23763	1004
Cnot8	23773	1005
Trp53bp1	23773	1006
Zscan18	23780	1007
Ccdc51	23789	1008
Gnptab	23793	1009
Klf4	23800	1010
Stk40	23800	1011
Fkbp10	23801	1012
Tmem59l	23801	1013
RP23-233B6.2	23802	1014
Elf2	23803	1015
Zfp954	23810	1016
Txn2	23816	1017
Pabpc4	23821	1018
Wnt7b	23840	1019
Zkscan2	23850	1020
Zfp354a	23851	1021
Zdhhc6	23855	1022
Cald1	23861	1023
Chac1	23861	1024
Pofut1	23863	1025
Rhob	23863	1026
Alg12	23904	1027
Thrb	23905	1028
Myo5a	23907	1029
Mbtps2	23921	1030
Tspyl2	23926	1031
Mrps14	23941	1032
Rab30	23941	1033
Wdr13	23956	1034
Arid1b	23959	1035
Sirt1	23959	1036
Hirip3	23960	1037
Psmb1	23967	1038
Lyz2	23971	1039
Zfp236	23977	1040
Pcnxl3	23981	1041
Agbl5	23983	1042
Nek1	23986	1043
Cds2	23988	1044
Fam188a	23995	1045
Sh3gl1	24001	1046
Nnt	24006	1047
Lrch1	24015	1048
Plekha5	24021	1049
Nfkbia	24026	1050
Clp1	24038	1051
Ercc2	24039	1052
Supv3l1	24045	1053
Tmc7	24049	1054
Acvr1	24051	1055
Man2c1	24052	1056
Fam63a	24063	1057
Rsl1	24064	1058
Zfp65	24065	1059
Col6a5	24066	1060
Max	24067	1061
Chmp3	24068	1062
Lyrm7	24069	1063
Irak1	24070	1064
Tle2	24080	1065
Myo16	24084	1066
Elk3	24090	1067
Tbc1d1	24092	1068
Rpl7	24095	1069
Pag1	24101	1070
Sntb1	24105	1071
Bex2	24107	1072
RP23-161B9.10	24118	1073
As3mt	24120	1074
Tmem261	24122	1075
Mettl14	24123	1076
Fam126b	24125	1077
Otud3	24132	1078
Sntb2	24135	1079
Plxnb1	24140	1080
Idi1	24151	1081
Incenp	24156	1082
Lonrf3	24165	1083
Gns	24167	1084
Kcnt1	24167	1085
RP24-87L14.1	24168	1086
Gapvd1	24169	1087
Tmsb10	24177	1088
Tsta3	24177	1089
Afap1l2	24178	1090
Syf2	24180	1091
Slc27a4	24186	1092
Iqck	24195	1093
Phtf1	24211	1094
Akap13	24212	1095
Lrrc73	24213	1096
Notch3	24228	1097
Nup54	24228	1098
Atraid	24230	1099
Ncf1	24232	1100
RP23-139J18.1	24233	1101
Ssbp1	24233	1102
Zfp467	24239	1103
Arhgap44	24240	1104
Rexo4	24244	1105
Klf15	24262	1106
Chmp1a	24272	1107
Ddx55	24281	1108
Dok4	24281	1109
Prkcb	24285	1110
Zc3h7b	24287	1111
Serpinf1	24289	1112
Klf7	24301	1113
Leprot	24304	1114
Ahnak	24309	1115
Zbtb37	24309	1116
Tmem119	24310	1117
Slc25a12	24311	1118
Yeats4	24314	1119
Crb2	24315	1120
Heg1	24318	1121
Bid	24321	1122
Nab2	24321	1123
Zfp30	24325	1124
Sez6l	24326	1125
Pcdh11x	24333	1126
Mob3b	24334	1127
Mrps5	24336	1128
Nr2c2ap	24348	1129
AC158971.1	24350	1130
Gdf10	24353	1131
Wipf2	24360	1132
Abca1	24364	1133
Stat1	24364	1134
Bud31	24365	1135
Smim1	24369	1136
Cpsf6	24385	1137
B4galt4	24389	1138
Sox1	24391	1139
Gsap	24396	1140
Arhgap22	24399	1141
Atg16l2	24400	1142
Srp14	24406	1143
Pabpn1	24407	1144
Polm	24407	1145
Dok3	24408	1146
Zfp518a	24408	1147
Ehd1	24410	1148
Ebpl	24416	1149
Paox	24420	1150
Celf1	24425	1151
Rad9a	24430	1152
Sparc	24439	1153
Ogg1	24441	1154
Eif2s3y	24444	1155
Robo4	24444	1156
Ccr5	24446	1157
Trit1	24446	1158
Tmem229a	24450	1159
Slc45a4	24463	1160
Ncam1	24464	1161
Ston1	24466	1162
Nop16	24467	1163
Drg1	24468	1164
Vsig2	24469	1165
H2afy	24473	1166
Poc1a	24481	1167
Tmed9	24484	1168
Mettl7a1	24489	1169
Grin2a	24497	1170
Man1b1	24509	1171
Carhsp1	24510	1172
Naa38	24510	1173
Col5a2	24514	1174
Pdgfrb	24529	1175
Msantd2	24532	1176
Frem1	24539	1177
Hlcs	24546	1178
Pnma3	24549	1179
Eml6	24561	1180
RP23-143D11.2	24566	1181
Elavl1	24577	1182
Supt5	24577	1183
Ddx6	24587	1184
Pdk1	24588	1185
Pdzrn3	24589	1186
Cdh9	24590	1187
Mylip	24594	1188
Hacd4	24596	1189
Yeats2	24596	1190
Cdkl5	24597	1191
Hmgb1	24603	1192
Hspg2	24613	1193
Ric1	24616	1194
Thoc6	24616	1195
Med22	24623	1196
Ndufa5	24644	1197
Zkscan6	24644	1198
Jade3	24652	1199
L3mbtl1	24652	1200
Mon2	24656	1201
Trex1	24656	1202
Sphk2	24658	1203
Dcun1d2	24668	1204
Fam207a	24668	1205
Cox7a2	24672	1206
March5	24672	1207
Mief1	24683	1208
3110082I17Rik	24684	1209
Aldh5a1	24688	1210
Brd2	24688	1211
Tln2	24692	1212
Tmem47	24693	1213
Ttc28	24693	1214
Gpt2	24694	1215
Idh3a	24694	1216
Ctss	24704	1217
Rtca	24708	1218
Zfp553	24709	1219
Nptx1	24712	1220
Garem1	24714	1221
Dgki	24718	1222
Ppp2r4	24726	1223
Rras2	24726	1224
Zfp773	24729	1225
Ano8	24747	1226
Palld	24769	1227
Stx6	24771	1228
Pde1b	24773	1229
Adgrg1	24776	1230
Rnf169	24780	1231
Slc9a1	24782	1232
Slc17a6	24784	1233
Lrrc40	24785	1234
Lsr	24787	1235
Hipk2	24790	1236
Plk3	24794	1237
Usp45	24807	1238
Slc25a53	24813	1239
Zfp831	24814	1240
Pclo	24816	1241
AC109227.1	24818	1242
Mn1	24820	1243
Akap17b	24824	1244
Ptprr	24824	1245
Ap2a2	24844	1246
Shkbp1	24844	1247
Tmod2	24850	1248
RP23-359B23.5	24854	1249
Faap24	24855	1250
Zfp68	24857	1251
Accs	24859	1252
Mcrs1	24863	1253
Slc7a8	24863	1254
Oser1	24874	1255
Arhgdig	24880	1256
Slc9a2	24883	1257
Btbd7	24886	1258
Eral1	24887	1259
Snapc2	24893	1260
Cars2	24895	1261
Cers5	24895	1262
Col18a1	24896	1263
Mib1	24896	1264
Stk19	24896	1265
Rabepk	24901	1266
Shank2	24901	1267
Aamdc	24909	1268
Samd12	24921	1269
Zfp617	24922	1270
RP24-219P17.7	24933	1271
Lrrk1	24941	1272
Nkain3	24941	1273
Ncbp2	24942	1274
Pcf11	24949	1275
Serpinb6a	24949	1276
Mb21d2	24954	1277
Zfp709	24955	1278
Tor1a	24959	1279
Mfap2	24963	1280
Ano6	24967	1281
Vasn	24971	1282
Kat6a	24972	1283
Nrxn1	24975	1284
Grik4	24982	1285
Slco1a4	24985	1286
Zbtb44	24985	1287
Zfp790	24987	1288
Dusp11	24994	1289
Deptor	24995	1290
Ccdc3	24998	1291
Fxr1	25004	1292
Prpf4b	25004	1293
Mrps15	25009	1294
Ddhd1	25023	1295
Ncbp1	25028	1296
Adam19	25031	1297
Gpr162	25031	1298
Gpx1	25039	1299
Plin4	25040	1300
St8sia1	25046	1301
Timm10b	25051	1302
Ccl21b	25052	1303
Diaph1	25054	1304
Aimp1	25075	1305
Nol3	25078	1306
Prmt1	25092	1307
Sh3bgrl2	25096	1308
Gimap6	25097	1309
Ireb2	25104	1310
Pfkfb2	25109	1311
AC103620.3	25110	1312
Rsph4a	25113	1313
Slc30a1	25129	1314
RP23-386E10.7	25138	1315
Hs1bp3	25150	1316
Fancg	25152	1317
Srrm4	25154	1318
Ddx49	25158	1319
Pnpla3	25158	1320
Zfp24	25161	1321
Ydjc	25162	1322
Baalc	25170	1323
Rps26	25172	1324
Tdp2	25176	1325
Cnot1	25177	1326
Dcc	25180	1327
Mknk2	25188	1328
Nol10	25190	1329
Ncoa2	25195	1330
Mat2a	25198	1331
Slc25a28	25198	1332
Fam20a	25202	1333
Mtss1	25202	1334
Med11	25209	1335
Fhod3	25212	1336
Csmd1	25216	1337
Kansl1l	25218	1338
Haus7	25222	1339
Gm340	25241	1340
Ahctf1	25244	1341
Nfatc2ip	25244	1342
Tceal6	25247	1343
Kdm5d	25250	1344
Id4	25251	1345
Kdm2b	25252	1346
RP23-32M15.2	25256	1347
Slc9a5	25259	1348
Cops7a	25265	1349
Rxra	25265	1350
Fgf11	25279	1351
Smtn	25279	1352
Akirin1	25288	1353
Rnf145	25303	1354
Heca	25305	1355
Rpl17	25307	1356
Slc7a5	25308	1357
Fmod	25310	1358
Thap3	25311	1359
Elp6	25313	1360
Prickle1	25313	1361
Ablim3	25316	1362
Hpgds	25318	1363
Gcc2	25319	1364
Arap2	25323	1365
Tox	25328	1366
Dhx32	25329	1367
Frs2	25332	1368
Isoc1	25333	1369
Ola1	25333	1370
Diaph2	25338	1371
Spata2l	25338	1372
Zfp14	25346	1373
Fbxl19	25350	1374
Heyl	25351	1375
Nebl	25357	1376
Gpc6	25360	1377
Rab28	25366	1378
Ift140	25371	1379
Zfp329	25379	1380
Rexo1	25390	1381
Cyp4f13	25394	1382
Rfxank	25396	1383
Rtn4r	25396	1384
Tbl3	25396	1385
Ndst1	25402	1386
Vps28	25403	1387
Zrsr2	25405	1388
Sfpq	25407	1389
Nit1	25408	1390
Taf1	25408	1391
Cers1	25418	1392
Tenm2	25418	1393
Ing3	25420	1394
Fkbp14	25424	1395
Grin2d	25424	1396
Prmt3	25428	1397
Htr5b	25429	1398
Plec	25435	1399
Ccbl2	25437	1400
Uba6	25439	1401
Amd1	25441	1402
Abca9	25442	1403
Gpr22	25443	1404
Lnpk	25444	1405
mt-Nd5	25446	1406
Prrg2	25461	1407
Zfp160	25463	1408
Gab1	25467	1409
Unc13b	25467	1410
Cntrob	25469	1411
Col1a2	25469	1412
Cpne6	25473	1413
Lhx6	25475	1414
Myl6	25479	1415
Tlk2	25481	1416
Spty2d1	25486	1417
Samd4	25491	1418
Clec16a	25496	1419
Rnf135	25503	1420
Nbr1	25507	1421
Agt	25509	1422
Cacng3	25515	1423
Gas2	25516	1424
Nfkbiz	25522	1425
Srrm2	25522	1426
Wdr81	25531	1427
Tcp11l1	25537	1428
Atf4	25539	1429
Dcdc2b	25539	1430
Rreb1	25539	1431
Tmed4	25539	1432
RP24-234J3.2	25542	1433
Ttll4	25544	1434
Stam2	25551	1435
Sptlc2	25554	1436
Lrrc28	25557	1437
Thbd	25560	1438
RP23-330D3.6	25561	1439
Tmem80	25561	1440
Plcb4	25573	1441
Rab27a	25575	1442
Slc25a11	25580	1443
Col6a2	25582	1444
Gap43	25585	1445
Nrbp1	25588	1446
Psph	25588	1447
Gprin3	25590	1448
Camk4	25591	1449
Arhgef17	25592	1450
Arel1	25599	1451
Ppard	25602	1452
Specc1l	25604	1453
Lrif1	25612	1454
Orc6	25613	1455
Nrip2	25614	1456
Ankrd35	25625	1457
Hey2	25626	1458
Slc25a16	25628	1459
Ahi1	25633	1460
Atp5j2	25637	1461
Aph1a	25638	1462
Gabrb1	25638	1463
Pusl1	25640	1464
Ankrd6	25643	1465
Phc3	25643	1466
L1cam	25649	1467
Tmeff2	25653	1468
Itm2b	25661	1469
Maml2	25663	1470
Mre11a	25663	1471
Tcea2	25664	1472
Wdr6	25665	1473
Mfsd12	25669	1474
Kcnk6	25672	1475
Afap1l1	25675	1476
Suclg1	25678	1477
Ryk	25679	1478
Pwwp2a	25684	1479
Gpr146	25688	1480
Tmcc3	25690	1481
Zbtb34	25693	1482
Zfp941	25696	1483
Rad21	25697	1484
Ankib1	25701	1485
Ppp1r16b	25702	1486
Abtb1	25703	1487
Pde2a	25708	1488
Lcat	25709	1489
Tmem88b	25718	1490
Foxj3	25720	1491
Gm2163	25722	1492
Hmgcll1	25724	1493
Pomk	25731	1494
Actl6b	25738	1495
Psg16	25740	1496
Tcf3	25741	1497
Setd8	25744	1498
Grin2b	25746	1499
Scrn3	25753	1500
Ptgs2	25755	1501
Ppp1r12b	25756	1502
Slc29a1	25760	1503
Unc79	25760	1504
Epha5	25764	1505
Epas1	25773	1506
Rundc1	25774	1507
Mbd2	25782	1508
Csrnp2	25783	1509
Rbm48	25792	1510
Cdk8	25795	1511
Copz2	25795	1512
N4bp1	25803	1513
Snd1	25810	1514
Psma4	25811	1515
Tollip	25827	1516
Gpr137c	25834	1517
B4gat1	25848	1518
Rfx5	25849	1519
Rassf1	25851	1520
Arl4c	25852	1521
Aqp4	25864	1522
Sipa1l3	25866	1523
Urm1	25872	1524
Rnf213	25873	1525
Blzf1	25881	1526
Gbp7	25882	1527
Ppip5k1	25883	1528
Hopx	25884	1529
Htra3	25888	1530
Nxph3	25891	1531
Slc6a8	25894	1532
Pccb	25895	1533
P3h3	25899	1534
Noa1	25910	1535
Cops6	25917	1536
Ccdc117	25919	1537
Itih5	25928	1538
Mfap3	25931	1539
Higd1a	25941	1540
Astn2	25942	1541
Cul9	25943	1542
Fbxo34	25944	1543
Ehd2	25950	1544
Orc3	25951	1545
Tango2	25952	1546
Dynll1	25954	1547
Pcdha12	25954	1548
Mapk3	25955	1549
Wdr60	25957	1550
Dhx15	25966	1551
Thumpd1	25970	1552
Gm26602	25971	1553
Secisbp2l	25971	1554
Hdac8	25976	1555
Ube3b	25978	1556
Acacb	25982	1557
Csrp2bp	25986	1558
Cnot6l	25993	1559
Atp6v0e2	25996	1560
Med26	26001	1561
Slc37a4	26002	1562
Mrpl15	26004	1563
Cnot10	26025	1564
Irgm2	26026	1565
Sco2	26028	1566
Ocrl	26040	1567
Qk	26043	1568
Psmd7	26051	1569
Wnk1	26052	1570
Acsl5	26053	1571
Snx25	26054	1572
Smug1	26060	1573
Enah	26063	1574
Trpc6	26068	1575
Trp53inp2	26070	1576
Nbea	26077	1577
Ccdc13	26087	1578
Rpl22l1	26089	1579
Dusp1	26090	1580
Pdpr	26093	1581
Tmem74	26094	1582
P4ha1	26104	1583
Dut	26113	1584
Wdr34	26115	1585
Tmem234	26118	1586
Pck2	26121	1587
Srpr	26122	1588
Fras1	26133	1589
RP23-343E20.2	26133	1590
Eif2b2	26134	1591
Rplp1	26137	1592
Ccdc112	26139	1593
Pmm1	26139	1594
Zbtb48	26144	1595
RP23-154K6.2	26145	1596
Park2	26150	1597
Adam11	26156	1598
Lrp8	26159	1599
Tmco1	26165	1600
RP24-63F2.1	26167	1601
Bag2	26168	1602
Kif1a	26169	1603
Map3k11	26180	1604
Dnajc25	26183	1605
Paqr5	26187	1606
Tspan31	26196	1607
Tcp1	26211	1608
Naaa	26213	1609
Adarb2	26217	1610
Vamp2	26218	1611
Usp13	26220	1612
Usp10	26222	1613
Usp15	26227	1614
Ilf3	26234	1615
L3mbtl2	26235	1616
Sox13	26243	1617
Tjp1	26243	1618
Frmd6	26246	1619
Bbs12	26248	1620
Celf3	26248	1621
Bves	26253	1622
Btd	26254	1623
Tex9	26265	1624
Skil	26266	1625
RP23-388H13.4	26268	1626
Setd4	26274	1627
Med13l	26278	1628
Map2	26280	1629
Scfd1	26282	1630
Bnip3l	26287	1631
Polrmt	26289	1632
Psmb3	26293	1633
Wnt9a	26293	1634
Fbxo10	26297	1635
Wdr54	26301	1636
Mtrr	26303	1637
Cacna2d2	26304	1638
Ube2v2	26306	1639
Nup214	26308	1640
Etv3	26309	1641
RP23-253N17.1	26311	1642
Srsf9	26328	1643
Plekha7	26330	1644
Eya1	26333	1645
Krtcap2	26337	1646
RP23-403O11.9	26337	1647
Cybrd1	26341	1648
Tbc1d8	26341	1649
Adcy9	26343	1650
Zfp3	26343	1651
Arhgap19	26344	1652
Gpc1	26346	1653
Mfap3l	26349	1654
Rec8	26349	1655
RP23-391A14.5	26353	1656
Iqsec1	26355	1657
Rpl37a	26366	1658
Ccng2	26368	1659
Xrcc3	26371	1660
Slc35f4	26373	1661
Lmbrd1	26374	1662
Recql4	26375	1663
Col11a1	26379	1664
G0s2	26379	1665
Fam167a	26380	1666
Zmym2	26383	1667
Lag3	26388	1668
Zfat	26396	1669
Pknox1	26401	1670
Pole3	26409	1671
Rps24	26415	1672
Dctn3	26418	1673
Irak2	26420	1674
Usp48	26429	1675
Fam189b	26432	1676
Bcas2	26435	1677
Cpeb3	26436	1678
Coq6	26440	1679
Mlip	26451	1680
Ccdc92b	26452	1681
Msi1	26453	1682
Igf1	26454	1683
Tmem143	26457	1684
Spred2	26459	1685
Npy2r	26462	1686
P3h4	26463	1687
Trmt2a	26464	1688
Fen1	26467	1689
Arid2	26471	1690
Nudt4	26475	1691
Igbp1	26478	1692
Zfp710	26492	1693
Sema7a	26493	1694
Exosc5	26497	1695
Cotl1	26498	1696
Nubp1	26501	1697
Ackr1	26503	1698
Nfkb1	26505	1699
Per3	26510	1700
Dars	26511	1701
Mad1l1	26513	1702
Arhgef26	26514	1703
Egfem1	26515	1704
Srcin1	26515	1705
Psmc3	26516	1706
Bcl6	26518	1707
Nub1	26520	1708
Zfp874a	26529	1709
Ccdc137	26530	1710
Fubp1	26533	1711
Zbtb20	26535	1712
Slc18b1	26541	1713
Ier5l	26542	1714
Plekhm1	26544	1715
Fam173b	26546	1716
Tspan2	26546	1717
Enho	26547	1718
Zfp780b	26553	1719
Ccdc181	26554	1720
Tsc1	26558	1721
Zfp280b	26559	1722
Zbed6	26562	1723
Syndig1l	26563	1724
Rabggtb	26565	1725
Wdr24	26565	1726
Prkdc	26566	1727
Smad4	26576	1728
Cdkl4	26577	1729
Cecr6	26577	1730
Tmem161b	26581	1731
Klhl28	26582	1732
Hmces	26584	1733
Prkab1	26589	1734
Gtf2ird2	26590	1735
Mog	26591	1736
Vit	26609	1737
Ppp1r26	26611	1738
Nufip2	26612	1739
Rnf103	26621	1740
Parp11	26627	1741
Dclre1c	26631	1742
Prss12	26636	1743
Itpripl2	26637	1744
Tnfaip3	26637	1745
Fam43a	26639	1746
Bcl11a	26641	1747
Zgrf1	26642	1748
Pdp1	26645	1749
Plxdc2	26649	1750
Galns	26653	1751
Spred3	26660	1752
Srsf10	26660	1753
Ctcf	26661	1754
Rbms3	26663	1755
Gpr62	26666	1756
Heatr1	26669	1757
Lrig1	26678	1758
Plin2	26680	1759
Cyp20a1	26682	1760
Cox20	26693	1761
Cad	26697	1762
Dmwd	26702	1763
Bbx	26708	1764
Pnp	26709	1765
Adgrb3	26710	1766
Pmepa1	26711	1767
Tmem161a	26711	1768
Cenpt	26712	1769
Pja1	26714	1770
L3mbtl3	26715	1771
S100a1	26717	1772
Dhx35	26719	1773
Fuk	26719	1774
Lonp1	26730	1775
Pde11a	26730	1776
Dctd	26731	1777
Nkiras2	26731	1778
Arhgap5	26732	1779
Cox7a2l	26732	1780
Mapk7	26733	1781
Sgsm2	26733	1782
Lingo2	26740	1783
8030462N17Rik	26741	1784
Chd2	26743	1785
Acer2	26747	1786
Cep97	26757	1787
Pcdhgc4	26758	1788
Bmpr1a	26770	1789
Avpi1	26771	1790
Rab23	26772	1791
Klhl34	26779	1792
Smarcc1	26779	1793
Cndp2	26792	1794
Gfpt2	26808	1795
Mospd1	26811	1796
Serhl	26816	1797
Cox6c	26818	1798
Pdk2	26819	1799
Lrrc75b	26823	1800
Tagln2	26826	1801
Nek7	26837	1802
Pianp	26849	1803
Psmg4	26849	1804
Polr3g	26853	1805
Trmt1l	26860	1806
Vipr1	26866	1807
Fabp3	26867	1808
Megf6	26870	1809
Atf7ip	26884	1810
Tpst1	26884	1811
Wnk2	26886	1812
Nupl1	26887	1813
Syt6	26893	1814
Arnt2	26894	1815
Adar	26897	1816
RP23-222G22.7	26899	1817
Axin2	26902	1818
Btg1	26907	1819
Zfp27	26908	1820
Serp1	26911	1821
Ppil4	26912	1822
Sept10	26928	1823
Rab3c	26931	1824
Selk	26932	1825
Larp1b	26935	1826
Tet3	26935	1827
Nudt16l1	26936	1828
Chd7	26937	1829
Ndufb3	26937	1830
Btbd1	26941	1831
Myl9	26941	1832
Adgre5	26942	1833
Igsf1	26953	1834
Zfp652	26953	1835
Tmem62	26955	1836
Ndrg1	26957	1837
Hmg20b	26959	1838
Dnaja2	26963	1839
Unc80	26973	1840
Esrra	26981	1841
Wdr53	26981	1842
Lactb	26983	1843
Col5a3	26985	1844
Fxyd5	26988	1845
Taf5l	26989	1846
Gtf2ird1	26996	1847
Prox1	26997	1848
Dlst	27001	1849
Ngrn	27003	1850
Fbxo28	27004	1851
Coq10b	27016	1852
Fbxo18	27017	1853
Il18bp	27025	1854
Wasf2	27025	1855
Gtf2f2	27031	1856
Gltscr2	27033	1857
Dguok	27039	1858
Rbpj	27043	1859
Tppp3	27047	1860
Mrps26	27048	1861
Casp2	27055	1862
Cntn6	27057	1863
B3gnt2	27058	1864
mt-Co2	27062	1865
Prpf38b	27062	1866
Dync2h1	27063	1867
Stk32a	27063	1868
Gpbp1l1	27064	1869
Slc9a3r2	27068	1870
Shc3	27072	1871
Mfsd1	27073	1872
Smc2	27074	1873
Chl1	27077	1874
Perm1	27079	1875
Nsdhl	27083	1876
Mogs	27087	1877
Mars	27090	1878
Ap5m1	27094	1879
Bdp1	27096	1880
Zfp324	27097	1881
Rqcd1	27102	1882
Etaa1	27103	1883
B4galt1	27112	1884
Hbegf	27112	1885
Ppp2r1a	27113	1886
Josd2	27114	1887
Taf6	27117	1888
Lnx1	27118	1889
Frat1	27123	1890
Gabra2	27125	1891
Usp53	27129	1892
Nts	27131	1893
Tbata	27144	1894
Tefm	27145	1895
Zfc3h1	27149	1896
Dnah7b	27151	1897
Scube3	27158	1898
Commd4	27160	1899
Efna2	27160	1900
Rhbdl1	27162	1901
Btf3	27164	1902
Psat1	27166	1903
Akap11	27168	1904
Pdia5	27168	1905
Dym	27171	1906
Nadk	27178	1907
Fam160b1	27179	1908
Lmbrd2	27179	1909
Ubald1	27184	1910
Mampt	27185	1911
Zbtb25	27187	1912
Acadm	27189	1913
Hdac7	27196	1914
Cox4i1	27200	1915
Tmem175	27202	1916
Ak7	27203	1917
Rfx2	27205	1918
Cnot3	27206	1919
Slc9a4	27206	1920
Comtd1	27209	1921
Gpatch2	27209	1922
Smyd5	27209	1923
Cntnap2	27211	1924
Chchd6	27213	1925
Endod1	27213	1926
Spock1	27214	1927
Dcn	27218	1928
Samhd1	27222	1929
Ldhb	27224	1930
Vps33a	27224	1931
Gata2	27225	1932
Commd7	27226	1933
Vcpip1	27226	1934
Swi5	27230	1935
Acaa1a	27234	1936
Huwe1	27238	1937
Sec61a2	27239	1938
Arpc1a	27241	1939
Pcdha7	27242	1940
Tm9sf4	27246	1941
Rps27l	27248	1942
Cwc27	27253	1943
Scn9a	27254	1944
Pcdhga11	27255	1945
Aox1	27260	1946
Gnl1	27263	1947
Slc7a6os	27264	1948
Lamtor2	27265	1949
Grik2	27268	1950
Spry1	27285	1951
Pcdha6	27287	1952
Slc44a1	27288	1953
Zfp35	27289	1954
Eno3	27291	1955
Galt	27292	1956
Lrrc58	27298	1957
Krit1	27303	1958
Cbx8	27315	1959
AC131065.2	27316	1960
Adam23	27317	1961
Ftsj3	27317	1962
RP23-330D3.9	27321	1963
Tmem14a	27321	1964
Dlg1	27325	1965
Arpp19	27327	1966
Cyc1	27327	1967
Tmem168	27336	1968
Tmem198b	27339	1969
Lrch4	27340	1970
Coq4	27341	1971
Tbc1d4	27342	1972
Tmcc2	27348	1973
Hnrnpa2b1	27349	1974
Mgat3	27352	1975
Shisa6	27352	1976
Rsl1d1	27353	1977
Zfp385a	27354	1978
Mrpl20	27362	1979
Stat3	27365	1980
Dgkg	27366	1981
Ece2	27367	1982
Dynlrb1	27372	1983
Mtrf1l	27373	1984
Calm3	27382	1985
Arfip2	27388	1986
Asap3	27394	1987
Pla2g16	27397	1988
Cabp1	27398	1989
Atp2a2	27399	1990
Sharpin	27410	1991
Eng	27414	1992
Reln	27418	1993
Aebp1	27419	1994
Nhs	27424	1995
Man2b1	27428	1996
Sorbs2	27430	1997
RP23-118A2.10	27436	1998
[truncated: 9,992 more rows]
