# Supplementary material for: Noradrenaline release from the locus coeruleus shapes stress-induced hippocampal gene expression
Source: bioRxiv preprint, doi:10.1101/2023.02.02.526661, version 2 (2023-11-01)
Supplement: Supplementary Table 2 [file 526661_file03.xlsx]

## Sheet: DEAresults
# metananalysis of sex:stress interactions in the ventral hippocampus 45min after initiation of swim stress (50 males & 20 females), merging the results table from the edgeR and DESeq2 analyses. Note that nothing passes genome-wide FDR.
Gene	logCPM	edgeR.stress.logFC	edgeR.stress.FDR	edgeR.interaction.logFC	DESeq2.interaction.logFC	DESeq2.interaction.logFC.stdErr	edgeR.interaction.PValue	DESeq2.interaction.PValue	edgeR.interaction.FDR	DESeq2.interaction.Padj	meanFDR
Ndfip1	8.01	-0.0359	0.104	0.0843	0.0758	0.0252	0.000579	9.61e-05	0.567	0.45	0.509
Atad5	2.03	-0.327	0.0308	0.651	0.56	0.189	0.000298	9.91e-05	0.567	0.45	0.509
Dph7	3.81	-0.0699	0.612	0.422	0.357	0.123	0.000317	0.000116	0.567	0.45	0.509
Ppp1r3f	4.34	-0.0624	0.385	0.245	0.209	0.0737	0.000258	0.000144	0.567	0.45	0.509
Ednrb	5.52	0.0458	0.435	-0.199	-0.00551	0.0111	0.000251	0.000197	0.567	0.45	0.509
Nsmce4a	4.33	-0.0428	0.614	0.247	0.204	0.0782	0.000432	0.000269	0.567	0.45	0.509
Afap1l2	3.65	0.0132	0.945	-0.359	-0.289	0.113	0.000499	0.000298	0.567	0.45	0.509
Ogfr	5.31	0.00481	0.953	0.153	0.126	0.0487	0.000423	0.000303	0.567	0.45	0.509
Mfap3	5.17	-0.0696	0.31	-0.239	-0.191	0.0756	0.00044	0.000329	0.567	0.45	0.509
Egfl7	4.31	-0.0581	0.266	0.189	0.153	0.0613	0.000314	0.000379	0.567	0.45	0.509
Ipo11	5.99	-0.00193	0.98	0.137	0.113	0.0453	0.000664	0.000402	0.567	0.45	0.509
Cbs	4.88	-0.0404	0.531	0.19	0.00486	0.0103	0.000672	0.000404	0.567	0.45	0.509
Dpysl4	5.22	0.0496	0.702	0.334	0.00251	0.00865	0.0008	0.000416	0.567	0.45	0.509
Evl	6.38	-0.0557	0.138	0.132	0.108	0.045	0.0011	0.000488	0.567	0.49	0.529
Qdpr	6.7	0.0276	0.632	-0.158	-0.122	0.0521	0.000667	0.000555	0.567	0.493	0.53
Tbc1d13	5.9	0.043	0.212	-0.123	-0.0955	0.0412	0.000608	0.000607	0.567	0.493	0.53
Swt1	3.33	-0.0127	0.933	-0.293	-0.227	0.101	0.00061	0.000663	0.567	0.493	0.53
Lrrc16a	4.5	0.132	0.0328	-0.239	-0.0033	0.00906	0.00105	0.000793	0.567	0.493	0.53
Rasl12	2.28	0.148	0.249	-0.43	-0.33	0.156	0.000951	0.000834	0.567	0.493	0.53
Dcaf10	4.39	0.0648	0.281	-0.201	-0.151	0.0709	0.000815	0.000865	0.567	0.493	0.53
Elovl1	3.78	0.0181	0.871	-0.24	-0.181	0.0854	0.001	0.000873	0.567	0.493	0.53
RP23-356J2.10	3.59	0.0929	0.382	-0.324	-0.244	0.116	0.00119	0.000905	0.567	0.493	0.53
Frrs1	1.75	0.154	0.289	-0.47	-0.35	0.171	0.00106	0.000975	0.567	0.493	0.53
Sfxn4	2.96	0.116	0.272	-0.355	-0.00204	0.00846	0.000992	0.00103	0.567	0.493	0.53
Ccp110	6.4	-0.0162	0.749	-0.123	-0.00796	0.0151	0.000945	0.00112	0.567	0.493	0.53
Ralgapa2	5.33	0.0169	0.784	0.141	0.106	0.053	0.00121	0.00116	0.567	0.493	0.53
Zfp598	5.65	0.0511	0.238	-0.143	-0.104	0.054	0.00116	0.00136	0.567	0.494	0.531
Vwc2	1.79	-0.019	0.97	0.375	0.284	0.15	0.0011	0.00137	0.567	0.494	0.531
Tbc1d7	3.6	0.0966	0.152	-0.243	-0.176	0.094	0.00104	0.00142	0.567	0.494	0.531
RP23-11C16.9	1.09	-0.274	0.574	1.28	0.000547	0.00812	0.0013	0.000788	0.569	0.493	0.531
Mog	5.29	0.135	0.018	-0.223	-0.165	0.0825	0.00134	0.00113	0.571	0.493	0.532
Spag8	1.03	0.285	0.0279	-0.511	-0.367	0.205	0.000861	0.00162	0.567	0.513	0.54
Zscan22	3.88	-0.0672	0.238	-0.189	-0.129	0.0835	0.00126	0.00239	0.569	0.533	0.551
Rtcb	6.64	-0.03	0.35	0.0974	0.0778	0.0351	0.00149	0.000785	0.614	0.493	0.553
Ttyh1	7.67	-0.00035	0.998	0.182	0.00407	0.00959	0.0021	0.00107	0.614	0.493	0.553
Atp5o	6.98	-0.033	0.631	0.169	0.129	0.0653	0.00226	0.00117	0.614	0.493	0.553
Stau2	7.07	-0.0465	0.0647	0.0881	0.0673	0.0329	0.00202	0.00117	0.614	0.493	0.553
Arrdc3	5.42	0.346	2.24e-10	0.226	0.172	0.0866	0.00183	0.00122	0.614	0.493	0.553
RP24-297N9.8	6.4	-0.0485	0.124	0.104	0.0801	0.0401	0.00228	0.00123	0.614	0.493	0.553
Hps4	4.15	0.126	0.412	0.436	0.326	0.167	0.00198	0.00136	0.614	0.494	0.554
Vps52	6.29	-0.0242	0.581	0.11	0.0835	0.0437	0.00246	0.00144	0.614	0.494	0.554
Rptor	5.94	-0.153	0.0397	0.259	0.00258	0.00867	0.00245	0.0015	0.614	0.503	0.559
Faim2	8.93	-0.0127	0.669	0.0683	0.0548	0.0262	0.00294	0.00115	0.627	0.493	0.56
Smc1a	6.54	-0.0335	0.359	0.103	0.0787	0.0411	0.00277	0.00143	0.627	0.494	0.561
Srsf5	6.83	0.268	0.000459	0.315	0.00207	0.00846	0.0016	0.00164	0.614	0.513	0.564
Trf	7.32	0.0762	0.26	-0.207	-0.145	0.0837	0.00219	0.00185	0.614	0.521	0.568
Abcb6	4.3	0.025	0.769	-0.194	-0.00354	0.0092	0.00165	0.00185	0.614	0.521	0.568
Adam1a	4.94	0.0328	0.792	-0.266	-0.00243	0.00861	0.00253	0.00197	0.614	0.523	0.569
Ints13	4.67	-0.103	0.0233	-0.172	-0.12	0.0726	0.00164	0.00203	0.614	0.523	0.569
Gatm	6.19	0.00618	0.938	-0.138	-0.0951	0.0566	0.00193	0.00206	0.614	0.523	0.569
Taf10	4.44	0.1	0.14	-0.221	-0.152	0.0932	0.00238	0.00208	0.614	0.523	0.569
Zfp595	1.81	-0.0889	0.572	-0.408	-0.00155	0.0083	0.0021	0.00216	0.614	0.526	0.57
Fanca	0.782	-0.047	0.876	0.591	0.425	0.269	0.00232	0.00219	0.614	0.526	0.57
Osbpl9	5.51	0.0473	0.391	-0.159	-0.00439	0.00982	0.00206	0.00224	0.614	0.526	0.57
Gfod2	4.55	-0.00517	0.958	-0.157	-0.0043	0.00975	0.00189	0.00228	0.614	0.527	0.57
Pcdhga5	4.44	-0.0889	0.382	0.28	0.00227	0.00854	0.00291	0.00183	0.627	0.521	0.574
Dnase1l2	1.95	-0.35	0.0839	-0.67	-0.000904	0.00817	0.00309	0.00182	0.639	0.521	0.58
Slitrk1	6.54	0.00707	0.91	0.112	0.00737	0.0138	0.00328	0.00161	0.649	0.513	0.581
Zfp90	2.97	-0.301	0.0242	0.46	0.00135	0.00825	0.00334	0.00179	0.649	0.521	0.585
Wdr73	3.85	-0.0335	0.853	0.364	0.00171	0.00835	0.00341	0.00195	0.649	0.523	0.586
Rbx1	6.34	-0.036	0.12	0.0753	0.0551	0.0339	0.00269	0.0026	0.622	0.554	0.588
Fndc3a	6.11	-0.00421	0.956	-0.121	-0.00599	0.0115	0.00243	0.00272	0.614	0.571	0.593
Pld2	4.8	0.0198	0.768	-0.148	-0.00445	0.00987	0.00211	0.00283	0.614	0.578	0.596
Pck2	4.53	-0.0973	0.318	0.277	0.00218	0.0085	0.00363	0.00236	0.663	0.533	0.598
Aldoc	9.66	-0.0481	0.154	0.102	0.00794	0.0149	0.00402	0.00208	0.673	0.523	0.598
Manbal	4.96	-0.0269	0.61	0.13	0.00497	0.0103	0.00255	0.00291	0.614	0.586	0.6
Dazap1	4.86	-0.00583	0.959	0.163	0.00385	0.00941	0.00359	0.00259	0.663	0.554	0.608
Traf7	4.84	-0.0679	0.705	0.389	0.277	0.175	0.00419	0.00221	0.693	0.526	0.609
Scyl1	6.05	-0.0487	0.182	0.11	0.0775	0.0495	0.00384	0.00255	0.67	0.554	0.612
Cdan1	4.65	-0.0232	0.85	-0.241	-0.0025	0.00863	0.00337	0.00283	0.649	0.578	0.614
Nxt1	2.56	0.00756	0.967	-0.292	-0.00197	0.00843	0.00182	0.00352	0.614	0.62	0.617
Bnip2	4.7	0.065	0.102	-0.135	-0.084	0.0692	0.00213	0.00365	0.614	0.62	0.617
Smad5	5.64	-0.0542	0.154	-0.122	-0.00529	0.0106	0.00258	0.0039	0.614	0.627	0.621
RP23-328F3.4	4.89	0.00209	0.98	0.13	0.00461	0.01	0.0027	0.00362	0.622	0.62	0.621
Rffl	3.75	0.0473	0.582	-0.214	-0.00271	0.00872	0.00284	0.00361	0.627	0.62	0.623
Zfhx2	7.14	0.0039	0.953	-0.103	-0.00746	0.0138	0.00308	0.00315	0.639	0.616	0.628
Plp1	10	0.0856	0.0863	-0.161	-0.00384	0.00939	0.00342	0.00332	0.649	0.62	0.635
Itpripl1	0.895	0.486	0.00901	-0.672	-0.000809	0.00815	0.0034	0.00347	0.649	0.62	0.635
Tspan2	6.44	0.115	0.00236	-0.14	-0.00444	0.00985	0.00356	0.00379	0.663	0.621	0.642
Plekho1	4.23	-0.0846	0.168	0.186	0.00315	0.00895	0.00378	0.0032	0.67	0.617	0.643
Mphosph6	2.82	-0.11	0.288	0.292	0.00192	0.00841	0.00386	0.00361	0.67	0.62	0.645
Ankib1	6.16	0.0411	0.206	-0.0998	-0.00678	0.0125	0.00288	0.00475	0.627	0.682	0.654
Use1	4.74	-0.0084	0.933	0.162	0.00348	0.00915	0.0044	0.00378	0.709	0.621	0.665
Kcnb2	4.59	-0.0704	0.254	0.175	0.00321	0.00899	0.00455	0.00359	0.712	0.62	0.666
Zfp362	4.81	-0.0646	0.141	0.131	0.0045	0.00989	0.00444	0.00393	0.709	0.627	0.668
B4gat1	6.53	0.0109	0.806	0.0857	0.00944	0.0187	0.00486	0.00334	0.723	0.62	0.672
Tm6sf2	1.48	-0.316	0.138	-0.644	-0.386	0.392	0.00501	0.00366	0.727	0.62	0.674
Nipal4	1.81	0.000265	0.999	-0.395	-0.00133	0.00825	0.00398	0.00475	0.673	0.682	0.678
AC159257.5	5.81	-0.0454	0.27	0.112	0.00548	0.0109	0.00533	0.00378	0.749	0.621	0.685
Serinc5	6.47	0.0515	0.103	-0.0976	-0.0582	0.0517	0.0046	0.00436	0.712	0.667	0.689
Ddx26b	5.12	-0.0194	0.898	0.258	0.175	0.137	0.00717	0.0031	0.768	0.615	0.692
Gdap1l1	6.23	-0.0392	0.19	0.0861	0.00806	0.0149	0.00527	0.00414	0.749	0.64	0.694
Pcdhb13	2.58	-0.0536	0.712	0.307	0.0017	0.00834	0.00488	0.00443	0.723	0.67	0.696
Poll	3.14	0.0631	0.429	-0.211	-0.0023	0.00854	0.00382	0.00709	0.67	0.725	0.697
Slc9a3r1	5.45	0.0165	0.753	0.103	0.00588	0.0113	0.00592	0.00397	0.768	0.627	0.698
Lamtor1	5.74	-0.0239	0.507	0.0902	0.00664	0.0123	0.004	0.0055	0.673	0.725	0.699
Pcdhga6	4.49	-0.0427	0.738	0.255	0.152	0.165	0.00637	0.00413	0.768	0.64	0.704
Secisbp2	4.33	-0.000257	0.998	-0.158	-0.00342	0.0091	0.00472	0.00491	0.721	0.69	0.706
Zfp658	3.34	-0.19	0.0454	-0.306	-0.00172	0.00835	0.00523	0.00456	0.749	0.676	0.712
Snx4	4.99	-0.0566	0.0989	0.108	0.00492	0.0102	0.00428	0.00618	0.701	0.725	0.713
Snx29	3.59	0.0648	0.382	-0.195	-0.00263	0.00868	0.00457	0.00672	0.712	0.725	0.718
Jakmip1	6.48	-0.0478	0.198	0.102	0.00595	0.0114	0.00705	0.00452	0.768	0.676	0.722
Stx2	4.03	-0.0542	0.471	-0.189	-0.00269	0.0087	0.00487	0.00631	0.723	0.725	0.724
Ube2k	6.73	-0.0303	0.286	0.0751	0.0109	0.0241	0.00649	0.00472	0.768	0.682	0.725
Olfr1402	-0.242	0.235	0.387	-0.692	-0.00066	0.00813	0.00501	0.00812	0.727	0.725	0.726
Adgrb3	6.9	0.00795	0.887	0.0917	0.00669	0.0124	0.00809	0.00485	0.768	0.689	0.729
Wnk2	7.47	0.0119	0.792	0.081	0.00826	0.0152	0.0093	0.00498	0.768	0.694	0.731
Ppp1r15a	4.08	0.305	8.92e-07	0.232	0.00221	0.00851	0.00587	0.00522	0.768	0.706	0.737
Erlin1	4.61	-0.11	0.032	-0.167	-0.00308	0.0089	0.00553	0.00617	0.762	0.725	0.743
Gtf2a1	5.55	-0.0554	0.152	-0.112	-0.00491	0.0102	0.00556	0.00678	0.762	0.725	0.743
Crkl	5.78	-0.0638	0.0792	-0.112	-0.00476	0.0101	0.00558	0.00748	0.762	0.725	0.743
Hdgfrp3	6.68	-0.00897	0.857	0.0842	0.00715	0.0131	0.00951	0.00554	0.768	0.725	0.746
Phkg2	5.06	-0.0296	0.748	0.177	0.00286	0.00879	0.00805	0.00561	0.768	0.725	0.746
Igsf8	7.62	-0.0525	0.0955	0.0889	0.00667	0.0123	0.00926	0.00572	0.768	0.725	0.746
Fam46a	3.13	0.213	0.0574	-0.341	-0.00144	0.00827	0.0067	0.00597	0.768	0.725	0.746
Slc50a1	3.51	-0.104	0.35	0.277	0.00178	0.00836	0.00813	0.00602	0.768	0.725	0.746
Spag16	0.00753	0.77	0.00615	-0.936	-0.000493	0.00812	0.0073	0.00606	0.768	0.725	0.746
Cdc37	6.74	-0.0209	0.608	0.0852	0.00677	0.0124	0.00922	0.00631	0.768	0.725	0.746
Shprh	5.75	-0.0814	0.0503	0.124	0.00414	0.00958	0.0087	0.00635	0.768	0.725	0.746
Fndc8	2.33	-0.0422	0.826	-0.357	-0.00134	0.00825	0.00671	0.0064	0.768	0.725	0.746
Timp4	5.36	0.046	0.377	0.125	0.00402	0.00949	0.00925	0.00648	0.768	0.725	0.746
Nhlrc3	3.21	0.0135	0.976	0.622	0.00077	0.00815	0.00714	0.00649	0.768	0.725	0.746
Usp15	6.42	-0.0292	0.501	0.0973	0.00554	0.0109	0.00951	0.00653	0.768	0.725	0.746
Cfap61	1.58	0.0919	0.653	-0.419	-0.00115	0.00821	0.00888	0.00658	0.768	0.725	0.746
Ufl1	4.79	-0.0564	0.367	0.152	0.00324	0.00899	0.00868	0.00658	0.768	0.725	0.746
Cmtm6	4.56	0.000271	0.998	-0.153	-0.00335	0.00905	0.00602	0.0068	0.768	0.725	0.746
Rb1	5.18	0.00728	0.928	0.119	0.00427	0.00967	0.00853	0.00685	0.768	0.725	0.746
Tceal8	5.03	-0.0131	0.867	0.132	0.00379	0.00933	0.00821	0.00686	0.768	0.725	0.746
Bckdha	5.22	-0.033	0.648	0.146	0.00336	0.00905	0.00931	0.00692	0.768	0.725	0.746
Crispld1	2.56	-0.141	0.202	0.303	0.00158	0.00831	0.00693	0.00695	0.768	0.725	0.746
Ubxn6	5.44	-0.00726	0.941	0.14	0.00352	0.00915	0.00872	0.00698	0.768	0.725	0.746
Csmd2	6.74	-0.00227	0.978	-0.112	-0.00488	0.0102	0.00696	0.00706	0.768	0.725	0.746
Polr2b	6.31	-0.0541	0.0308	0.0783	0.00797	0.0144	0.00722	0.00721	0.768	0.725	0.746
4930518I15Rik	0.75	0.118	0.661	-0.541	-0.000851	0.00816	0.00927	0.00723	0.768	0.725	0.746
Dopey1	5.55	0.11	0.211	-0.237	-0.00202	0.00844	0.00863	0.00754	0.768	0.725	0.746
Ermn	5.46	0.00094	0.995	-0.192	-0.00255	0.00864	0.00695	0.00759	0.768	0.725	0.746
Mrps18a	4.88	-0.0406	0.409	0.119	0.00402	0.00948	0.00855	0.00763	0.768	0.725	0.746
Wdr63	-0.171	0.428	0.237	-0.989	-0.000454	0.00812	0.00721	0.00775	0.768	0.725	0.746
Cttnbp2nl	4.99	0.081	0.0881	-0.141	-0.00356	0.00917	0.00708	0.0078	0.768	0.725	0.746
Shc1	3.7	0.0227	0.815	-0.184	-0.00256	0.00865	0.00585	0.00807	0.768	0.725	0.746
Prcp	2.86	-0.0387	0.749	0.232	0.00193	0.00841	0.00828	0.00814	0.768	0.725	0.746
Gp1ba	0.347	0.244	0.256	0.568	0.000806	0.00815	0.00746	0.00816	0.768	0.725	0.746
Srgap2	7	0.0139	0.714	-0.0759	-0.0083	0.015	0.00727	0.00817	0.768	0.725	0.746
Mrpl2	4.41	-0.00743	0.936	0.135	0.00343	0.00909	0.00868	0.0082	0.768	0.725	0.746
Kcnj5	0.032	-0.142	0.634	0.638	0.000683	0.00814	0.00903	0.00824	0.768	0.725	0.746
Dusp11	6.58	-0.083	0.0637	-0.133	-0.00368	0.00924	0.0079	0.0084	0.768	0.725	0.746
Chn2	4.36	0.0666	0.338	-0.178	-0.00268	0.0087	0.00748	0.0085	0.768	0.725	0.746
RP23-167G19.12	3.01	0.0928	0.368	0.248	0.0018	0.00836	0.00956	0.00861	0.768	0.725	0.746
Ddr1	6.21	0.0268	0.609	-0.111	-0.00459	0.00992	0.00801	0.00869	0.768	0.725	0.746
Stard3	4.56	0.045	0.532	-0.163	-0.00291	0.00881	0.00786	0.00873	0.768	0.725	0.746
Aoc2	3.2	0.104	0.347	-0.27	-0.00167	0.00833	0.00939	0.00875	0.768	0.725	0.746
Fbxl14	4.62	-0.0119	0.9	-0.149	-0.00319	0.00895	0.0086	0.00885	0.768	0.725	0.746
Slc38a9	4.98	0.0181	0.785	-0.128	-0.00387	0.00937	0.00592	0.00887	0.768	0.725	0.746
Slc30a6	3.54	-0.0674	0.381	0.187	0.00239	0.00857	0.00862	0.00889	0.768	0.725	0.746
Mex3c	5.38	-0.172	0.00113	-0.177	-0.00263	0.00867	0.00845	0.0089	0.768	0.725	0.746
Jrk	3.5	-0.00876	0.955	0.212	0.00211	0.00847	0.00871	0.0089	0.768	0.725	0.746
Hcfc2	5.57	-0.0455	0.45	-0.143	-0.00334	0.00904	0.00787	0.00891	0.768	0.725	0.746
Cd99l2	6.42	-0.0379	0.275	0.0886	0.00632	0.0118	0.00979	0.00625	0.772	0.725	0.748
Letm1	6.52	-0.00674	0.901	0.0849	0.00658	0.0121	0.00982	0.00739	0.772	0.725	0.748
Kdm4a	6.18	-0.0199	0.516	0.0677	0.00924	0.0173	0.00982	0.00739	0.772	0.725	0.748
Zkscan3	5.9	-0.0957	0.157	-0.186	-0.00249	0.00861	0.009	0.00926	0.768	0.732	0.75
Pfdn1	4.89	-0.0773	0.0327	0.116	0.00415	0.00957	0.00655	0.00931	0.768	0.732	0.75
Crlf3	3.63	0.0281	0.806	-0.205	-0.00217	0.00849	0.00895	0.00937	0.768	0.732	0.75
Fam53a	4.79	-0.0647	0.14	-0.126	-0.00378	0.0093	0.00666	0.00956	0.768	0.733	0.751
Cdk7	4.31	0.044	0.498	-0.156	-0.00305	0.00887	0.00598	0.00964	0.768	0.733	0.751
Akap6	8.3	-0.0354	0.131	0.0632	0.0409	0.0358	0.0109	0.00519	0.797	0.706	0.752
Vwa5b1	1.58	0.143	0.452	-0.442	-0.000969	0.00818	0.00978	0.00964	0.772	0.733	0.753
Nkain4	4.53	-0.053	0.335	0.136	0.00329	0.009	0.00941	0.00976	0.768	0.738	0.753
Mapre2	8.22	-0.0121	0.606	0.0473	0.0333	0.0247	0.0124	0.00519	0.805	0.706	0.756
Chst12	4.14	-0.05	0.5	0.163	0.00291	0.00881	0.0103	0.00767	0.787	0.725	0.756
Trib1	3.64	0.504	1.47e-12	0.234	0.00194	0.00841	0.0103	0.00826	0.787	0.725	0.756
RP23-11C16.8	1.27	0.557	0.0873	-0.9	-0.00049	0.00812	0.0115	0.00565	0.797	0.725	0.761
Ppm1l	7.27	-0.045	0.168	0.0859	0.0065	0.0121	0.0113	0.00663	0.797	0.725	0.761
Dusp1	4.2	0.887	3.22e-14	0.368	0.00125	0.00823	0.011	0.00763	0.797	0.725	0.761
RP24-458M20.2	2.39	-0.0674	0.783	0.423	0.00103	0.00819	0.0122	0.00803	0.797	0.725	0.761
C1qtnf6	1.13	0.193	0.501	-0.63	-0.000693	0.00814	0.012	0.0081	0.797	0.725	0.761
Rtn2	6.01	-0.0166	0.772	0.102	0.00471	0.01	0.0121	0.00834	0.797	0.725	0.761
Acot11	5.96	-0.0155	0.883	0.166	0.00273	0.00872	0.0118	0.00853	0.797	0.725	0.761
Dhx35	4.1	-0.0227	0.9	0.278	0.00159	0.00831	0.012	0.009	0.797	0.728	0.762
Vrk1	3.62	-0.0193	0.883	0.209	0.00209	0.00846	0.0108	0.00934	0.797	0.732	0.765
Hes1	3.43	-0.0359	0.818	0.26	0.00167	0.00833	0.012	0.00944	0.797	0.733	0.765
Eef1g	7.45	-0.0516	0.417	0.143	0.00317	0.00894	0.0128	0.00866	0.812	0.725	0.768
Zc3h15	6.39	0.0197	0.772	-0.125	-0.00377	0.00929	0.00919	0.0103	0.768	0.769	0.769
Zfp280b	4.64	-0.0142	0.841	-0.126	-0.00366	0.00923	0.00785	0.0103	0.768	0.769	0.769
Gab1	5.05	0.078	0.115	-0.134	-0.00343	0.00908	0.012	0.00987	0.797	0.742	0.77
Sema4d	6.33	0.0237	0.578	-0.0928	-0.00545	0.0107	0.00805	0.0105	0.768	0.776	0.772
Csnk1g1	5.84	-0.00538	0.932	-0.0969	-0.00525	0.0105	0.00611	0.0107	0.768	0.776	0.772
Mtf1	5.34	0.00918	0.902	-0.119	-0.00388	0.00936	0.00881	0.0108	0.768	0.776	0.772
Tceal9	5.43	-0.041	0.416	0.112	0.00412	0.00954	0.0134	0.0091	0.824	0.732	0.778
RP24-122D14.1	4.83	-0.0746	0.0852	-0.127	-0.00359	0.00917	0.00796	0.0111	0.768	0.788	0.778
Kif13b	5.9	0.0352	0.557	-0.129	-0.00353	0.00914	0.0102	0.0109	0.787	0.777	0.782
Gabrr2	0.0476	0.322	0.135	-0.607	-0.000666	0.00814	0.00889	0.0118	0.768	0.801	0.785
Tti2	3.98	0.0711	0.62	-0.289	-0.00148	0.00828	0.0122	0.0106	0.797	0.776	0.787
AC102628.1	2.25	-0.341	0.001	0.331	0.00129	0.00823	0.012	0.0107	0.797	0.776	0.787
Timm10b	4.2	0.0256	0.758	-0.157	-0.00278	0.00873	0.00898	0.012	0.768	0.807	0.787
Phactr3	6.95	-0.00323	0.952	0.0686	0.00809	0.0145	0.0142	0.00925	0.844	0.732	0.788
Sod2	7.2	-0.0516	0.021	0.0623	0.00956	0.0178	0.0172	0.00953	0.845	0.733	0.789
Gfm2	4.62	-0.0466	0.565	0.168	0.00253	0.00863	0.0126	0.0107	0.806	0.776	0.791
Lpar6	1.83	0.0872	0.526	-0.309	-0.00132	0.00824	0.00829	0.0124	0.768	0.823	0.796
Fzd7	3.27	0.0335	0.832	-0.267	-0.00157	0.0083	0.0121	0.0119	0.797	0.803	0.8
Dnlz	4.86	-0.11	0.0484	0.157	0.00271	0.0087	0.0133	0.0108	0.824	0.776	0.8
Plekha1	6.66	0.0238	0.495	-0.0773	-0.00656	0.012	0.01	0.0124	0.781	0.823	0.802
Golga5	4.87	-0.0444	0.247	0.101	0.00404	0.00947	0.00923	0.0128	0.768	0.838	0.803
Alkbh5	6.02	-0.0278	0.65	-0.121	-0.00367	0.00922	0.0105	0.0122	0.796	0.817	0.806
Ctdspl	5.08	-0.0134	0.849	-0.122	-0.00356	0.00914	0.0093	0.0144	0.768	0.852	0.81
Rab37	1.35	0.0978	0.59	-0.392	-0.000973	0.00818	0.009	0.0149	0.768	0.852	0.81
Cav1	3.48	0.0239	0.855	-0.218	-0.00189	0.00839	0.0118	0.0129	0.797	0.838	0.817
Arrb2	5.51	-0.0231	0.753	0.127	0.00337	0.00904	0.0145	0.0112	0.844	0.791	0.818
Psma7	5.84	0.00811	0.877	0.0821	0.00545	0.0107	0.0137	0.0118	0.835	0.801	0.818
Ssbp3	7	-0.0209	0.679	0.0922	0.00487	0.0101	0.0157	0.0112	0.845	0.791	0.818
Tnfrsf25	4.23	-0.331	0.0569	-0.481	-0.000807	0.00815	0.0121	0.0132	0.797	0.84	0.819
Snrpb	5.48	-0.0346	0.602	0.132	0.0032	0.00895	0.0143	0.0115	0.844	0.798	0.821
Tmem104	4.44	-0.0936	0.215	0.185	0.00224	0.00851	0.0153	0.0116	0.844	0.798	0.821
Shisa5	5.28	-0.0244	0.762	0.139	0.00303	0.00886	0.0155	0.0116	0.844	0.798	0.821
Ddx54	5.5	-0.0594	0.19	0.111	0.00386	0.00935	0.0158	0.0116	0.845	0.798	0.822
Asna1	6.13	-0.0299	0.284	0.069	0.00657	0.0119	0.012	0.0136	0.797	0.849	0.823
Ttr	6.92	2.41	0.0237	-2.79	-0.000156	0.0081	0.105	0.00811	0.924	0.725	0.824
Rdh10	3.33	-0.0378	0.75	-0.211	-0.0019	0.00839	0.0122	0.0141	0.797	0.852	0.824
Prkaa1	5.28	0.0152	0.789	-0.1	-0.00432	0.00966	0.0111	0.0144	0.797	0.852	0.824
Thoc2	5.89	-0.00266	0.972	-0.0931	-0.00481	0.0101	0.0111	0.0147	0.797	0.852	0.824
Txnrd1	6.04	0.000491	0.995	-0.1	-0.00436	0.00969	0.0109	0.0148	0.797	0.852	0.824
Tcf7l1	2.26	0.154	0.158	-0.291	-0.00136	0.00825	0.0118	0.0149	0.797	0.852	0.824
Krcc1	3.39	-0.081	0.298	-0.193	-0.00203	0.00843	0.0112	0.0155	0.797	0.852	0.824
Phc2	6.3	0.0217	0.675	-0.0992	-0.00425	0.0096	0.0118	0.0166	0.797	0.852	0.824
Cep78	3.78	0.0676	0.317	-0.165	-0.00233	0.00854	0.0114	0.0171	0.797	0.852	0.824
Spag6l	0.328	-0.284	0.145	0.53	0.000698	0.00814	0.0108	0.0174	0.797	0.852	0.824
Kcnd1	4.1	0.00985	0.926	-0.152	-0.00258	0.00864	0.0118	0.0174	0.797	0.852	0.824
Osbp	6.4	0.0145	0.643	-0.0621	-0.0072	0.0126	0.0113	0.0192	0.797	0.856	0.826
Tldc1	3.76	-0.0481	0.461	-0.144	-0.00249	0.0086	0.0118	0.0201	0.797	0.856	0.826
Tsku	0.921	0.135	0.39	-0.359	-0.00092	0.00817	0.0121	0.0222	0.797	0.856	0.826
Tdrd5	2.07	0.126	0.36	-0.323	-0.0012	0.00822	0.0127	0.0158	0.806	0.852	0.829
Cyfip1	7.04	0.0117	0.825	-0.0889	-0.0047	0.00994	0.0127	0.0176	0.806	0.852	0.829
Gfer	3.69	-0.0478	0.506	-0.155	-0.00231	0.00852	0.0125	0.0216	0.805	0.856	0.83
Hdac4	6.41	-0.0127	0.893	-0.142	-0.00294	0.00881	0.013	0.0138	0.818	0.849	0.834
Lrmda	-0.0517	0.127	0.714	-0.649	-0.000563	0.00812	0.013	0.0163	0.818	0.852	0.835
Gpr88	2.4	-0.244	0.503	0.832	0.000481	0.00812	0.0133	0.0136	0.824	0.849	0.837
Prrg1	2.02	0.0689	0.635	-0.275	-0.0014	0.00826	0.0132	0.0144	0.824	0.852	0.838
Sec14l5	4.61	0.0791	0.407	-0.215	-0.00189	0.00839	0.0137	0.0133	0.835	0.846	0.841
Cacnb4	7.26	-0.0492	0.346	0.117	0.00356	0.00915	0.0167	0.0127	0.845	0.836	0.841
Slc39a7	5.86	-0.0253	0.665	0.107	0.00386	0.00934	0.0167	0.0132	0.845	0.84	0.843
Zfp109	3.1	-0.134	0.0956	-0.217	-0.00184	0.00837	0.0137	0.0145	0.835	0.852	0.844
Anks3	4.81	0.0341	0.692	-0.161	-0.00253	0.00862	0.014	0.0138	0.84	0.849	0.845
Mcf2l	7.7	0.048	0.062	-0.0707	-0.00645	0.0117	0.0139	0.0178	0.839	0.852	0.846
Znfx1	6	-0.0265	0.653	-0.112	-0.00356	0.00914	0.014	0.0174	0.84	0.852	0.846
Ticam1	2.77	0.0453	0.71	-0.223	-0.00167	0.00832	0.0138	0.0196	0.839	0.856	0.847
Acadsb	4.75	-0.062	0.48	0.18	0.0022	0.00849	0.0177	0.0136	0.845	0.849	0.847
Acrbp	2.66	-0.0903	0.547	-0.309	-0.00125	0.00823	0.0151	0.0145	0.844	0.852	0.848
Sdf2	5.09	-0.0281	0.642	0.117	0.00341	0.00906	0.0152	0.0147	0.844	0.852	0.848
Tmem170	2.34	-0.13	0.294	-0.291	-0.00131	0.00824	0.0147	0.0154	0.844	0.852	0.848
Gramd3	4	0.084	0.287	-0.188	-0.0021	0.00845	0.0152	0.0154	0.844	0.852	0.848
Med20	4.16	0.0157	0.884	-0.165	-0.00238	0.00856	0.0153	0.0155	0.844	0.852	0.848
Fosb	3.75	1.22	1.07e-28	-0.238	-0.00163	0.00831	0.0151	0.0156	0.844	0.852	0.848
Med29	3.65	-0.0855	0.209	0.17	0.0022	0.00849	0.0154	0.0164	0.844	0.852	0.848
Atp11a	6.56	0.0611	0.0397	-0.0825	-0.00516	0.0103	0.0155	0.0173	0.844	0.852	0.848
Rarres2	2.44	0.128	0.239	-0.271	-0.00139	0.00825	0.0145	0.0174	0.844	0.852	0.848
Zfp229	1.88	-0.0498	0.798	-0.328	-0.00112	0.0082	0.0153	0.0179	0.844	0.852	0.848
Bcl2l1	6.57	-0.0036	0.964	0.0951	0.00447	0.00979	0.0187	0.0127	0.861	0.836	0.848
Nlrc5	0.154	-0.138	0.685	0.63	0.000578	0.00813	0.0168	0.0144	0.845	0.852	0.849
Wdfy2	5.51	0.0565	0.126	-0.095	-0.00446	0.00977	0.0158	0.0145	0.845	0.852	0.849
Golph3l	4.37	-0.047	0.455	0.135	0.00287	0.00877	0.0168	0.0155	0.845	0.852	0.849
Tox3	3.46	-0.0337	0.753	0.181	0.00207	0.00845	0.0175	0.0157	0.845	0.852	0.849
B3galnt1	5.38	-0.051	0.173	0.0921	0.00422	0.00958	0.0177	0.0157	0.845	0.852	0.849
Brip1	2.19	0.0265	0.898	0.303	0.00123	0.00822	0.017	0.0168	0.845	0.852	0.849
Per2	6.14	0.0617	0.436	-0.168	-0.00229	0.00852	0.0165	0.0168	0.845	0.852	0.849
Mrpl4	4.9	0.00649	0.928	0.0967	0.00385	0.00931	0.0166	0.0174	0.845	0.852	0.849
Lrch3	5.91	0.0429	0.331	-0.101	-0.00398	0.0094	0.0161	0.0174	0.845	0.852	0.849
Mtmr4	7.17	0.0225	0.722	-0.112	-0.00351	0.0091	0.0159	0.018	0.845	0.852	0.849
Stk11	5.54	-0.0687	0.189	0.124	0.00331	0.009	0.0188	0.0129	0.861	0.838	0.849
Zfp553	4.56	-0.0856	0.103	-0.137	-0.00279	0.00872	0.0155	0.0185	0.844	0.854	0.849
Acvr1	5.37	0.0324	0.572	-0.113	-0.00344	0.00906	0.0161	0.0181	0.845	0.854	0.85
Vcl	5.65	0.0165	0.865	-0.148	-0.00255	0.00862	0.0175	0.0183	0.845	0.854	0.85
Kdm2a	6.89	-0.00917	0.882	-0.0922	-0.00438	0.00967	0.0166	0.0185	0.845	0.854	0.85
Cldn11	6.39	0.106	0.0569	-0.15	-0.00252	0.00861	0.0164	0.0186	0.845	0.854	0.85
Ly86	2.84	0.0646	0.536	-0.224	-0.00163	0.00831	0.0144	0.0195	0.844	0.856	0.85
Flcn	5.65	-0.00506	0.948	-0.101	-0.00382	0.00929	0.015	0.0199	0.844	0.856	0.85
Tln1	5.74	0.00752	0.908	-0.0938	-0.00419	0.00953	0.0153	0.0207	0.844	0.856	0.85
Tdrp	3.83	-0.087	0.16	-0.158	-0.00231	0.00852	0.0151	0.0213	0.844	0.856	0.85
Kremen1	4.76	0.0735	0.112	-0.122	-0.00309	0.00886	0.0147	0.0213	0.844	0.856	0.85
Zfp697	4.56	-0.0563	0.282	-0.122	-0.00303	0.00883	0.0155	0.0217	0.844	0.856	0.85
Nup43	1.75	-0.0741	0.629	-0.3	-0.00113	0.0082	0.0154	0.0232	0.844	0.856	0.85
Vstm2b	5.43	0.0265	0.617	-0.101	-0.00365	0.00917	0.0154	0.0236	0.844	0.856	0.85
Hif1an	6.15	-0.0392	0.363	-0.0961	-0.00409	0.00947	0.0165	0.019	0.845	0.856	0.851
Zfp575	2.83	-0.149	0.0442	0.197	0.00181	0.00836	0.0175	0.0198	0.845	0.856	0.851
Mob1a	4.79	-0.0275	0.761	-0.154	-0.0024	0.00856	0.0176	0.0202	0.845	0.856	0.851
Car2	7.19	0.0102	0.873	-0.0953	-0.00407	0.00945	0.0173	0.0205	0.845	0.856	0.851
Mat2a	7.6	0.0987	0.000169	-0.0817	-0.00491	0.0101	0.0168	0.0207	0.845	0.856	0.851
Fam198b	2.45	0.0563	0.681	-0.246	-0.00141	0.00826	0.0175	0.0208	0.845	0.856	0.851
Blzf1	4.33	0.0123	0.897	-0.138	-0.00256	0.00862	0.0174	0.0216	0.845	0.856	0.851
Adamtsl4	2.66	0.0481	0.731	-0.242	-0.00142	0.00826	0.0176	0.0218	0.845	0.856	0.851
Espn	2.66	0.0521	0.643	-0.206	-0.00167	0.00832	0.0166	0.0232	0.845	0.856	0.851
RP23-407H16.1	3.01	-0.0433	0.668	0.187	0.00182	0.00836	0.0162	0.0236	0.845	0.856	0.851
Pdcd6ip	6.5	0.0368	0.138	-0.0622	-0.00653	0.0117	0.0172	0.0238	0.845	0.856	0.851
Zdhhc20	5.77	0.0209	0.685	-0.0925	-0.00392	0.00933	0.0177	0.0242	0.845	0.856	0.851
Nme5	1.74	0.145	0.34	-0.354	-0.000959	0.00817	0.0165	0.0244	0.845	0.857	0.851
Btg2	4.45	0.954	1.51e-15	0.338	0.00117	0.00821	0.0201	0.013	0.866	0.838	0.852
Zfp420	3.38	-0.00905	0.971	-0.289	-0.00128	0.00823	0.0182	0.0177	0.86	0.852	0.856
Zkscan17	3.44	0.0429	0.71	0.202	0.00187	0.00838	0.0197	0.0144	0.861	0.852	0.856
Enho	5.12	-0.0621	0.288	0.132	0.00294	0.0088	0.0199	0.0151	0.861	0.852	0.856
Lig1	3.16	0.00839	0.967	0.248	0.00151	0.00828	0.0187	0.0158	0.861	0.852	0.856
Tbc1d19	4.67	-0.00116	0.995	0.223	0.00168	0.00833	0.0198	0.016	0.861	0.852	0.856
Tchh	2.99	0.0817	0.411	0.21	0.00176	0.00835	0.0185	0.0162	0.861	0.852	0.856
Lrrn3	6.41	-0.0207	0.673	0.0876	0.0045	0.00979	0.0197	0.0162	0.861	0.852	0.856
Mlxipl	1.27	-0.233	0.539	0.744	0.000483	0.00812	0.0193	0.0166	0.861	0.852	0.856
Tex10	4.25	0.0854	0.42	-0.221	-0.00168	0.00832	0.019	0.0175	0.861	0.852	0.856
Bloc1s6	1.3	0.305	0.212	-0.575	-0.000629	0.00813	0.0198	0.0176	0.861	0.852	0.856
Larp6	5.06	-0.0511	0.277	0.108	0.00347	0.00908	0.0193	0.0178	0.861	0.852	0.856
RP23-421B5.3	2.03	-0.0327	0.9	-0.369	-0.000974	0.00817	0.0183	0.0181	0.86	0.854	0.857
Ermap	-0.827	-1.03	0.326	2.49	0.000115	0.0081	0.0102	0.0466	0.787	0.927	0.857
Dhdh	3.65	0.0699	0.329	-0.159	-0.00224	0.0085	0.0184	0.0194	0.86	0.856	0.858
Raver2	6.21	-0.0228	0.791	-0.14	-0.0026	0.00864	0.0184	0.0211	0.86	0.856	0.858
Usp21	5.23	-0.0199	0.785	-0.12	-0.00298	0.0088	0.0184	0.0232	0.86	0.856	0.858
RP24-406I15.2	2.08	-0.157	0.177	0.279	0.00124	0.00822	0.0196	0.0197	0.861	0.856	0.858
Thap2	4.6	-0.214	3.44e-05	-0.162	-0.00222	0.00849	0.0186	0.0205	0.861	0.856	0.858
Cep135	3.35	0.127	0.175	-0.225	-0.00157	0.0083	0.0189	0.0206	0.861	0.856	0.858
Cnp	7.06	0.08	0.121	-0.128	-0.00286	0.00875	0.0192	0.0212	0.861	0.856	0.858
Trim12a	0.883	-0.0494	0.857	-0.421	-0.000793	0.00815	0.0196	0.0216	0.861	0.856	0.858
Nras	5.39	0.0348	0.565	-0.118	-0.00307	0.00885	0.0191	0.0228	0.861	0.856	0.858
Chac1	2.77	-0.0922	0.273	0.193	0.00171	0.00833	0.0189	0.0229	0.861	0.856	0.858
Kat2b	4.49	0.052	0.347	-0.122	-0.00281	0.00873	0.0194	0.024	0.861	0.856	0.858
Cops8	6.19	0.0415	0.152	-0.0742	-0.00508	0.0102	0.0156	0.0266	0.844	0.873	0.859
Cd2bp2	6.58	-0.0445	0.272	0.0916	0.00461	0.00989	0.0206	0.0134	0.87	0.848	0.859
Slc4a5	0.281	2.75	0.00746	-3.11	-0.000124	0.0081	0.0801	0.0116	0.92	0.798	0.859
Kcng3	2.62	0.125	0.261	-0.249	-0.00142	0.00826	0.0176	0.0265	0.845	0.873	0.859
Cryz	3.97	0.0411	0.567	-0.141	-0.00237	0.00854	0.0178	0.0268	0.845	0.873	0.859
Usp33	7.07	-0.0131	0.8	0.0821	0.00504	0.0102	0.0205	0.015	0.87	0.852	0.861
Foxp4	5.49	-0.0659	0.106	0.101	0.00378	0.00927	0.0208	0.0169	0.87	0.852	0.861
Rfc5	3.37	-0.0166	0.916	0.216	0.00168	0.00832	0.0207	0.017	0.87	0.852	0.861
Fermt1	1.15	-0.323	0.132	0.529	0.000741	0.00814	0.0244	0.0131	0.884	0.839	0.861
Tor1aip2	5.8	0.0242	0.521	-0.0769	-0.00465	0.00983	0.0174	0.0276	0.845	0.879	0.862
Prr14l	6.75	0.0168	0.763	-0.0917	-0.00394	0.00934	0.0199	0.0247	0.861	0.864	0.862
Adal	4.23	-0.0618	0.486	-0.179	-0.00202	0.00842	0.0208	0.0198	0.87	0.856	0.863
Fastkd3	1.13	0.651	0.353	-1.45	-0.000208	0.0081	0.0203	0.0202	0.87	0.856	0.863
Faap100	3.51	0.0509	0.725	-0.243	-0.00142	0.00826	0.0208	0.0216	0.87	0.856	0.863
l7Rn6	4.23	-0.0765	0.209	-0.144	-0.0024	0.00855	0.0207	0.0238	0.87	0.856	0.863
Dyrk1a	6.54	0.061	0.00732	0.0639	0.00689	0.0123	0.021	0.0156	0.874	0.852	0.863
Poglut1	4.92	-0.224	0.011	0.241	0.00154	0.00829	0.0232	0.0149	0.876	0.852	0.864
Plekhm2	6.56	0.00462	0.943	0.0793	0.00509	0.0103	0.0214	0.0156	0.876	0.852	0.864
Maged1	9.35	0.0127	0.763	0.0673	0.00635	0.0116	0.0232	0.016	0.876	0.852	0.864
Pcdh9	6.98	-0.0622	0.0698	0.0862	0.00461	0.00987	0.0234	0.0162	0.876	0.852	0.864
Lrig1	5.22	-0.0564	0.555	0.186	0.002	0.00842	0.0212	0.0171	0.876	0.852	0.864
Rusc2	7.22	-0.0414	0.263	0.0819	0.00477	0.01	0.0231	0.0171	0.876	0.852	0.864
Gnb2	7.53	-0.0233	0.709	0.104	0.00364	0.00918	0.0236	0.0173	0.876	0.852	0.864
Prkar2b	5.13	-0.0607	0.276	0.125	0.00292	0.00879	0.0216	0.0179	0.876	0.852	0.864
Dennd1a	6.44	0.0328	0.307	0.0699	0.00552	0.0107	0.0232	0.0185	0.876	0.854	0.865
Ppp1r3g	2.65	0.404	7.17e-06	0.269	0.00131	0.00824	0.0229	0.0188	0.876	0.856	0.866
Id2	5.89	0.0876	0.104	0.134	0.00272	0.00869	0.0217	0.0188	0.876	0.856	0.866
Lnpk	5.08	-0.143	0.0135	0.153	0.00233	0.00853	0.0228	0.0188	0.876	0.856	0.866
Ndufa6	5.23	-0.0269	0.732	0.129	0.00278	0.00872	0.023	0.0193	0.876	0.856	0.866
Katnal2	2.51	-0.0789	0.653	0.31	0.00109	0.00819	0.0231	0.0213	0.876	0.856	0.866
Chia1	1.22	0.289	0.0581	-0.402	-0.000852	0.00816	0.0214	0.0214	0.876	0.856	0.866
RP23-341M13.1	3.6	0.00994	0.942	0.17	0.00199	0.00841	0.0234	0.0219	0.876	0.856	0.866
Irf2bp2	5.23	0.175	6.22e-08	0.0963	0.00366	0.00917	0.0236	0.0223	0.876	0.856	0.866
Trim21	1.06	0.0525	0.841	-0.403	-0.000818	0.00815	0.0225	0.0225	0.876	0.856	0.866
Enpp6	2.49	0.163	0.275	-0.337	-0.00101	0.00818	0.024	0.0226	0.876	0.856	0.866
Calml4	0.201	0.57	0.147	-1.06	-0.000335	0.00811	0.0224	0.0226	0.876	0.856	0.866
Setd8	5.24	-0.109	0.183	-0.19	-0.00179	0.00835	0.0238	0.0234	0.876	0.856	0.866
Lsr	2.66	0.107	0.387	-0.261	-0.00128	0.00823	0.0214	0.0234	0.876	0.856	0.866
Mobp	6.35	0.241	0.000427	-0.2	-0.00172	0.00833	0.0239	0.0235	0.876	0.856	0.866
Syne3	1.06	0.263	0.104	-0.396	-0.000827	0.00815	0.0221	0.0239	0.876	0.856	0.866
Tob2	4.84	0.154	0.0403	-0.193	-0.00176	0.00834	0.024	0.024	0.876	0.856	0.866
Mthfr	5.36	0.0398	0.559	-0.129	-0.00269	0.00867	0.0226	0.024	0.876	0.856	0.866
Cttnbp2	6.35	-0.014	0.958	-0.314	-0.00103	0.00818	0.0238	0.0242	0.876	0.856	0.866
Map3k10	7.2	-0.0336	0.206	0.0602	0.00814	0.0143	0.0244	0.0137	0.884	0.849	0.866
Ddx55	4.29	0.0374	0.652	-0.149	-0.00228	0.00851	0.0206	0.0248	0.87	0.864	0.867
Larp4	5.82	-0.0321	0.61	-0.115	-0.003	0.00881	0.0208	0.0252	0.87	0.864	0.867
Myrip	6.07	0.0257	0.661	-0.105	-0.00334	0.00899	0.0196	0.0258	0.861	0.873	0.867
Zfp101	3.2	0.0258	0.811	-0.173	-0.00185	0.00837	0.0194	0.0261	0.861	0.873	0.867
Nnt	3	-0.414	0.187	0.68	0.000436	0.00811	0.0242	0.0219	0.881	0.856	0.868
Cflar	4.87	-0.0243	0.805	-0.153	-0.00219	0.00848	0.0218	0.0252	0.876	0.864	0.87
9130213A22Rik	0.417	-0.141	0.627	0.506	0.000637	0.00813	0.0229	0.0253	0.876	0.864	0.87
Lpcat1	4.49	0.193	0.431	-0.498	-0.00068	0.00814	0.0246	0.0185	0.885	0.854	0.87
Plekhh1	4.75	0.0568	0.681	-0.237	-0.00143	0.00826	0.0246	0.0241	0.885	0.856	0.871
Car14	2.73	0.206	0.189	-0.375	-0.000884	0.00816	0.0247	0.0238	0.886	0.856	0.871
Magee1	7.46	0.00264	0.959	0.0569	0.00858	0.0151	0.0258	0.0142	0.896	0.852	0.874
Atg9a	7.25	-0.00419	0.932	0.0603	0.00707	0.0125	0.0263	0.0162	0.896	0.852	0.874
Lrfn1	5.77	-0.0335	0.519	0.0962	0.00392	0.00936	0.0261	0.0173	0.896	0.852	0.874
Phtf1	5.16	-0.00517	0.966	-0.138	-0.00245	0.00857	0.0232	0.0259	0.876	0.873	0.874
Slc16a1	5.39	-0.0577	0.273	-0.118	-0.00289	0.00876	0.022	0.026	0.876	0.873	0.874
Mitf	3.22	0.11	0.198	-0.198	-0.00166	0.00832	0.0227	0.0263	0.876	0.873	0.874
Igsf1	3.3	0.112	0.204	-0.209	-0.00159	0.0083	0.0219	0.0265	0.876	0.873	0.874
Eif4e3	4.53	-0.0478	0.44	-0.128	-0.00256	0.00861	0.0212	0.0266	0.876	0.873	0.874
Slf2	6.34	-0.0319	0.402	-0.0796	-0.00448	0.00971	0.0213	0.0267	0.876	0.873	0.874
Cnnm1	7.36	-0.0173	0.624	0.0612	0.0069	0.0123	0.027	0.0179	0.897	0.852	0.874
Nyap1	6.58	-0.0794	0.0293	0.0931	0.00397	0.00938	0.0253	0.0189	0.896	0.856	0.876
Adarb2	3.72	-0.0881	0.317	0.189	0.00184	0.00837	0.0254	0.0192	0.896	0.856	0.876
Slc39a10	7.38	-0.0389	0.374	0.0894	0.00409	0.00947	0.0261	0.0192	0.896	0.856	0.876
Krt2	3.42	-0.044	0.751	0.218	0.00154	0.00829	0.0257	0.0213	0.896	0.856	0.876
Zfp7	2.62	-0.14	0.177	-0.241	-0.00139	0.00825	0.0259	0.0218	0.896	0.856	0.876
Aff2	3.8	-0.0425	0.616	0.152	0.00214	0.00846	0.0259	0.0229	0.896	0.856	0.876
Amacr	2.96	-0.184	0.0319	0.221	0.00147	0.00827	0.0254	0.0238	0.896	0.856	0.876
Ubxn2a	5.39	-0.071	0.0434	0.089	0.00384	0.00928	0.0256	0.0242	0.896	0.856	0.876
Cask	6.21	0.0182	0.625	0.0649	0.0056	0.0107	0.0269	0.0221	0.897	0.856	0.876
Ralyl	5.91	-0.0275	0.582	0.0903	0.00376	0.00924	0.027	0.0227	0.897	0.856	0.876
Eif3d	6	-0.00288	0.967	0.0776	0.00442	0.00969	0.027	0.0231	0.897	0.856	0.876
Lrrc28	3.84	-0.0204	0.928	-0.289	-0.00116	0.0082	0.0267	0.0233	0.897	0.856	0.876
Ehd4	3.16	-0.00352	0.984	0.186	0.00172	0.00833	0.0269	0.0241	0.897	0.856	0.876
Atp5g1	7.11	0.0145	0.753	-0.0761	-0.00462	0.0098	0.0205	0.0294	0.87	0.885	0.877
Pno1	4.17	0.0148	0.88	-0.141	-0.00232	0.00852	0.0223	0.028	0.876	0.881	0.878
Mfap3l	5.97	-0.0276	0.643	-0.104	-0.00322	0.00891	0.0238	0.0283	0.876	0.881	0.878
Slco1a4	5.65	0.0332	0.558	-0.107	-0.00312	0.00886	0.0237	0.0284	0.876	0.881	0.878
Hdac11	7.7	-0.0404	0.103	0.0583	0.00752	0.0132	0.0288	0.0167	0.906	0.852	0.879
Mesdc2	5.53	0.0458	0.142	-0.0771	-0.00416	0.00944	0.0192	0.0358	0.861	0.898	0.88
Cog3	5.22	0.0282	0.673	-0.119	-0.00282	0.00872	0.0218	0.0291	0.876	0.885	0.88
Bcl7a	5.61	-0.202	0.0131	0.209	0.0016	0.0083	0.0287	0.0209	0.906	0.856	0.881
Gprin3	3.9	-0.15	0.0267	0.169	0.002	0.00842	0.0289	0.0211	0.906	0.856	0.881
Rftn2	4.91	-0.0665	0.211	0.119	0.00287	0.00876	0.0277	0.0217	0.906	0.856	0.881
Hmgcs2	2.97	-0.0782	0.635	0.283	0.00115	0.0082	0.0279	0.0242	0.906	0.856	0.881
Fgf14	5.11	-0.0106	0.895	0.107	0.00306	0.00884	0.0285	0.0243	0.906	0.856	0.881
Gpsm2	3.87	0.0417	0.631	-0.154	-0.00203	0.00842	0.0239	0.0298	0.876	0.887	0.881
Zfp35	4.36	-0.124	0.0495	-0.161	-0.00199	0.00841	0.025	0.027	0.894	0.874	0.884
Emd	4.47	0.0844	0.195	0.146	0.00234	0.00854	0.0293	0.0208	0.912	0.856	0.884
Hacd3	7.44	-0.0206	0.407	0.0488	0.00879	0.0149	0.0301	0.021	0.912	0.856	0.884
RP23-264J18.3	5.16	-0.0837	0.142	0.127	0.00261	0.00864	0.0296	0.023	0.912	0.856	0.884
Socs2	4.23	0.0314	0.732	0.144	0.00227	0.00851	0.03	0.0239	0.912	0.856	0.884
Ntn1	3.15	-0.0305	0.809	0.184	0.00175	0.00834	0.0298	0.0242	0.912	0.856	0.884
Zmynd11	7.87	0.0114	0.731	0.051	0.00887	0.0153	0.0321	0.0186	0.914	0.854	0.884
Tcf7	1.73	-0.233	0.038	0.286	0.00109	0.00819	0.0263	0.0262	0.896	0.873	0.885
Fam163a	4	-0.0493	0.521	0.144	0.00228	0.00851	0.0264	0.0271	0.896	0.874	0.885
RP23-273D6.2	6.43	-0.00822	0.86	0.0662	0.00538	0.0105	0.0278	0.025	0.906	0.864	0.885
Map3k8	0.424	0.0403	0.946	-0.675	-0.000502	0.00812	0.0317	0.02	0.914	0.856	0.885
Pdxp	7.25	-0.0272	0.352	0.0583	0.00671	0.0119	0.0313	0.0203	0.914	0.856	0.885
Meaf6	6.72	0.0167	0.749	0.0803	0.0045	0.00976	0.0305	0.0206	0.914	0.856	0.885
Ubqln1	7.63	-0.0282	0.221	0.0492	0.00828	0.014	0.0331	0.0223	0.914	0.856	0.885
Ctdnep1	5.47	-0.0255	0.664	0.0965	0.00349	0.00907	0.0309	0.0235	0.914	0.856	0.885
Sncb	8.14	-0.0357	0.554	0.107	0.00313	0.00888	0.0311	0.0237	0.914	0.856	0.885
Fam103a1	5.7	-0.0439	0.17	0.0702	0.00472	0.00991	0.0332	0.0242	0.914	0.856	0.885
Mgrn1	7.92	0.00743	0.845	0.0534	0.00754	0.013	0.0334	0.0212	0.915	0.856	0.885
Prkar1b	9.33	-0.0162	0.577	0.0501	0.00794	0.0135	0.0347	0.0224	0.916	0.856	0.886
Wars	6.71	-0.00761	0.85	0.0557	0.00656	0.0117	0.0353	0.0243	0.916	0.856	0.886
Clic6	1.79	1.37	0.0434	-1.74	-0.000213	0.0081	0.058	0.0177	0.92	0.852	0.886
March8	6.15	0.00335	0.96	-0.0755	-0.00446	0.00967	0.0238	0.031	0.876	0.898	0.887
Ube2cbp	0.945	0.0033	1	0.331	0.000845	0.00815	0.0226	0.0342	0.876	0.898	0.887
RP24-456P10.1	2.03	-0.0158	0.969	0.242	0.00122	0.00821	0.0216	0.0343	0.876	0.898	0.887
Fcgr1	1.18	0.0139	0.967	-0.386	-0.000776	0.00815	0.0238	0.0344	0.876	0.898	0.887
Nlrp6	0.538	0.349	0.0431	-0.443	-0.000651	0.00813	0.0237	0.0357	0.876	0.898	0.887
Rhobtb3	4.62	0.0497	0.312	-0.106	-0.00293	0.00876	0.0241	0.0346	0.877	0.898	0.888
Msantd2	3.55	-0.0624	0.523	-0.186	-0.00169	0.00832	0.0261	0.028	0.896	0.881	0.888
Ptp4a3	5.21	-0.0306	0.623	0.105	0.00309	0.00886	0.0304	0.0247	0.914	0.864	0.889
Baz1a	0.733	0.0413	0.878	-0.391	-0.000726	0.00814	0.0215	0.0383	0.876	0.902	0.889
Sugp1	5.57	-0.0458	0.387	0.103	0.0032	0.00891	0.0327	0.0254	0.914	0.864	0.889
Dcaf6	6.64	0.00847	0.865	0.068	0.00503	0.0101	0.0328	0.0254	0.914	0.864	0.889
Ndufb7	5.49	-0.0646	0.176	0.106	0.00305	0.00883	0.0312	0.0254	0.914	0.864	0.889
Zfp318	6.24	-0.00509	0.943	0.0808	0.00417	0.0095	0.0334	0.0253	0.915	0.864	0.889
Taf1d	1.4	-0.28	0.329	0.573	0.000528	0.00812	0.0349	0.0249	0.916	0.864	0.89
RP23-24M22.6	-0.000541	0.0416	0.928	-0.586	-0.000523	0.00812	0.0264	0.0292	0.896	0.885	0.89
Kansl3	6.64	0.00774	0.935	-0.117	-0.00279	0.00871	0.0256	0.0293	0.896	0.885	0.89
Dxo	3.74	0.0864	0.267	-0.168	-0.00189	0.00838	0.0264	0.0295	0.896	0.885	0.89
Gpbp1	6.26	-0.0385	0.391	0.0875	0.00376	0.00922	0.0297	0.0256	0.912	0.869	0.891
Prkar1a	9.54	0.000409	0.991	0.029	0.0145	0.0173	0.0586	0.025	0.92	0.864	0.892
Fra10ac1	3.6	-0.0883	0.199	0.154	0.00199	0.00841	0.0281	0.0278	0.906	0.881	0.893
Kcns1	3.5	0.0464	0.66	0.177	0.00177	0.00834	0.0284	0.028	0.906	0.881	0.893
Zfp84	4.35	-0.188	0.000101	-0.138	-0.00227	0.0085	0.0289	0.0282	0.906	0.881	0.893
Iba57	3.22	-0.0317	0.783	0.175	0.00177	0.00834	0.028	0.0286	0.906	0.881	0.893
Ifrd1	4.53	0.213	0.000272	0.163	0.00195	0.0084	0.0309	0.0265	0.914	0.873	0.894
Thoc6	2.2	-0.072	0.663	0.274	0.00113	0.0082	0.0315	0.0267	0.914	0.873	0.894
Sox5	5.4	-0.0427	0.39	0.0969	0.00327	0.00894	0.0321	0.0268	0.914	0.873	0.894
Entpd5	5.3	-0.0774	0.0638	0.1	0.00317	0.00889	0.0321	0.0273	0.914	0.874	0.894
Fam71e1	0.958	-0.283	0.104	0.412	0.000729	0.00814	0.0275	0.0293	0.905	0.885	0.895
Btbd10	6.05	-0.0177	0.678	0.0681	0.00478	0.00993	0.0354	0.027	0.916	0.874	0.895
Slc6a20b	0.00294	-0.228	0.533	0.671	0.000442	0.00811	0.0339	0.0271	0.916	0.874	0.895
Rbm6	5.63	-0.0145	0.871	0.119	0.00265	0.00865	0.0347	0.0271	0.916	0.874	0.895
Srsf6	6.11	0.123	0.0143	0.126	0.00248	0.00858	0.0329	0.0276	0.914	0.879	0.896
Dpp7	3.55	-0.09	0.42	0.213	0.00146	0.00826	0.035	0.0274	0.916	0.876	0.896
Tgfb1	2.09	-0.0151	0.933	0.218	0.00133	0.00824	0.0251	0.0311	0.895	0.898	0.896
Mrpl47	3.67	-0.0531	0.518	0.152	0.00201	0.00841	0.0299	0.0285	0.912	0.881	0.896
Purb	8.96	-0.0144	0.673	0.0532	0.00661	0.0117	0.0388	0.0261	0.92	0.873	0.897
Pja1	7.81	0.00581	0.878	0.048	0.00752	0.0128	0.0421	0.0262	0.92	0.873	0.897
Ppp4r3b	5.62	-0.0585	0.167	-0.0963	-0.00336	0.00898	0.0262	0.0317	0.896	0.898	0.897
Cers2	5.5	0.0617	0.0778	-0.0866	-0.00367	0.00915	0.0259	0.0324	0.896	0.898	0.897
Ralgapb	7.51	0.0119	0.663	0.0421	0.00956	0.0155	0.0431	0.0272	0.92	0.874	0.897
Ascc2	5.69	0.024	0.656	-0.0925	-0.00335	0.00897	0.0258	0.0352	0.896	0.898	0.897
Slc4a2	4.82	0.198	0.0795	-0.267	-0.00119	0.00821	0.0314	0.0284	0.914	0.881	0.897
Twf2	4.87	-0.0987	0.0707	0.13	0.00236	0.00853	0.0322	0.0286	0.914	0.881	0.897
Gm1604a	1.61	-0.00565	0.983	0.28	0.00106	0.00819	0.0327	0.0287	0.914	0.881	0.897
Atg7	4.86	-0.0323	0.478	0.0883	0.00335	0.00897	0.0266	0.0321	0.897	0.898	0.898
Kdm5b	6.64	0.0114	0.786	-0.0645	-0.00526	0.0103	0.0267	0.0333	0.897	0.898	0.898
Ss18	5.24	-0.00962	0.907	-0.107	-0.00287	0.00874	0.0269	0.0348	0.897	0.898	0.898
Xylt2	4.7	-0.0329	0.622	0.11	0.0028	0.00871	0.035	0.0282	0.916	0.881	0.898
Tle4	6.04	-0.0241	0.637	0.0844	0.00373	0.0092	0.0346	0.0282	0.916	0.881	0.898
Mapkapk5	3.84	-0.0374	0.873	0.302	0.000995	0.00818	0.0356	0.0286	0.916	0.881	0.898
Elovl7	3.28	0.227	0.131	-0.346	-0.000906	0.00816	0.0285	0.0303	0.906	0.891	0.899
Olfr147	0.921	0.166	0.341	-0.349	-0.000817	0.00815	0.0257	0.0378	0.896	0.901	0.899
Tmem88b	5.42	0.0207	0.832	-0.145	-0.00219	0.00847	0.0273	0.0306	0.902	0.895	0.899
Socs3	0.59	-0.102	0.755	0.5	0.000607	0.00813	0.0331	0.0289	0.914	0.884	0.899
Samd11	0.608	0.231	0.529	-0.653	-0.00046	0.00812	0.0327	0.029	0.914	0.884	0.899
Zfp418	1.99	-0.338	0.00538	-0.329	-0.00091	0.00816	0.0303	0.0295	0.914	0.885	0.899
H2afv	4.45	-0.0484	0.396	0.113	0.00267	0.00866	0.0301	0.0299	0.912	0.887	0.9
Copz1	6.16	-0.000706	0.993	0.0734	0.00435	0.0096	0.0365	0.0289	0.916	0.884	0.9
Sart3	5.45	-0.105	0.0471	0.125	0.00244	0.00856	0.0346	0.0295	0.916	0.885	0.901
Zfp652	6.09	-0.0328	0.49	-0.0892	-0.00371	0.00918	0.0282	0.0306	0.906	0.895	0.901
Clk4	5.04	-0.264	2.09e-05	-0.182	-0.00172	0.00833	0.0281	0.0307	0.906	0.895	0.901
RP23-231E23.4	7.87	-0.0244	0.323	0.0471	0.0074	0.0126	0.0442	0.0281	0.92	0.881	0.901
Pigg	4.6	0.0272	0.602	-0.0962	-0.00289	0.00872	0.0221	0.0469	0.876	0.927	0.901
Rprm	4.85	-0.0492	0.581	0.149	0.00204	0.00842	0.0364	0.0298	0.916	0.887	0.902
Dip2b	6.51	-0.0187	0.689	-0.0774	-0.00426	0.00952	0.0278	0.0316	0.906	0.898	0.902
Pcyox1l	4.45	-0.025	0.758	-0.124	-0.0025	0.00858	0.0281	0.0333	0.906	0.898	0.902
Map4k4	7.25	0.0255	0.545	-0.0766	-0.00424	0.0095	0.0288	0.0335	0.906	0.898	0.902
Enpp2	7.4	0.656	0.0707	-0.852	-0.000355	0.00811	0.0332	0.0301	0.914	0.89	0.902
Cbl	7.27	-0.00928	0.877	-0.0817	-0.00394	0.00931	0.0283	0.0336	0.906	0.898	0.902
Tnfaip6	2.46	0.181	0.0462	-0.227	-0.00127	0.00822	0.0286	0.0363	0.906	0.898	0.902
Yif1b	4.21	-0.00969	0.932	0.131	0.00228	0.0085	0.0348	0.03	0.916	0.889	0.902
Rbbp6	6.75	0.0486	0.067	-0.0646	-0.00505	0.0101	0.0275	0.0375	0.906	0.899	0.902
Rbm15	2.67	-0.112	0.385	-0.261	-0.00109	0.00819	0.0288	0.0373	0.906	0.899	0.903
Tmem59l	8.16	-0.00247	0.966	0.0589	0.00555	0.0106	0.043	0.0294	0.92	0.885	0.903
Rgag1	0.964	-0.074	0.769	0.386	0.000742	0.00814	0.0365	0.0302	0.916	0.89	0.903
Mtmr7	5.86	-0.0109	0.846	0.0773	0.00397	0.00934	0.038	0.0297	0.92	0.887	0.904
Tmem63a	4.65	0.052	0.512	-0.149	-0.00207	0.00843	0.0292	0.0322	0.91	0.898	0.904
Slc1a6	3.4	0.0556	0.465	-0.148	-0.00188	0.00837	0.0273	0.0412	0.902	0.907	0.905
Ap5m1	4.84	-0.071	0.155	-0.113	-0.00262	0.00862	0.029	0.0379	0.908	0.902	0.905
Hbb-bs	5.63	-0.109	0.732	0.529	0.000586	0.00813	0.0301	0.0334	0.912	0.898	0.905
Hdx	3.73	-0.0333	0.771	-0.172	-0.00175	0.00833	0.0297	0.0338	0.912	0.898	0.905
Ppp4r4	6.22	0.0956	0.0496	-0.119	-0.00254	0.00859	0.0295	0.0355	0.912	0.898	0.905
Trnt1	5.42	-0.0117	0.873	0.0715	0.00408	0.00939	0.0299	0.0358	0.912	0.898	0.905
Prpf38a	4	-0.0857	0.127	0.131	0.00217	0.00846	0.0296	0.0375	0.912	0.899	0.906
Dazap2	6.66	0.0102	0.832	0.0647	0.00485	0.00997	0.0428	0.0303	0.92	0.891	0.906
Fiz1	4.13	-0.0258	0.741	0.12	0.00248	0.00857	0.0315	0.0326	0.914	0.898	0.906
Akr7a5	4.16	-0.0899	0.141	0.136	0.00217	0.00846	0.0329	0.0328	0.914	0.898	0.906
RP23-211B19.2	3.1	-0.0745	0.472	-0.193	-0.00154	0.00828	0.0321	0.0329	0.914	0.898	0.906
Plpp7	4.34	-0.0629	0.238	0.114	0.00259	0.00862	0.0312	0.0334	0.914	0.898	0.906
Cdr2	2.62	0.273	0.0327	-0.323	-0.000913	0.00816	0.0328	0.0339	0.914	0.898	0.906
Elp4	3.64	-0.0132	0.894	0.13	0.00216	0.00846	0.0317	0.0349	0.914	0.898	0.906
Olfr550	1.56	0.251	0.0545	-0.312	-0.00093	0.00817	0.0312	0.0356	0.914	0.898	0.906
Spata9	-0.112	-0.102	0.795	-0.475	-0.000575	0.00812	0.033	0.036	0.914	0.898	0.906
Prr18	4.96	0.0248	0.803	-0.144	-0.00205	0.00842	0.033	0.0362	0.914	0.898	0.906
Pmaip1	0.714	0.439	0.00802	0.432	0.000662	0.00813	0.0319	0.0364	0.914	0.898	0.906
Mfrp	1.44	1.3	0.137	-2.05	-0.00015	0.0081	0.0321	0.0366	0.914	0.898	0.906
Map3k11	4.55	-0.0158	0.853	-0.121	-0.00238	0.00853	0.0282	0.0411	0.906	0.907	0.907
Angptl6	2.4	-0.128	0.298	0.244	0.00119	0.00821	0.0357	0.0313	0.916	0.898	0.907
Fgfrl1	4.06	-0.116	0.0994	0.161	0.00187	0.00837	0.0348	0.0314	0.916	0.898	0.907
Hba-a1	5.44	-0.122	0.706	0.541	0.000575	0.00812	0.0336	0.0314	0.916	0.898	0.907
Dhrs1	5.58	-0.00935	0.865	0.0748	0.00411	0.00942	0.0352	0.0315	0.916	0.898	0.907
Tab1	4.62	0.0466	0.404	0.107	0.00268	0.00866	0.0359	0.0323	0.916	0.898	0.907
Pan3	5.1	0.00308	0.989	-0.209	-0.0014	0.00825	0.0364	0.034	0.916	0.898	0.907
Atp5sl	5.1	-0.0607	0.169	0.0949	0.00306	0.00882	0.0364	0.0348	0.916	0.898	0.907
Zfp947	1.29	0.11	0.572	-0.339	-0.00085	0.00815	0.0353	0.0354	0.916	0.898	0.907
Anapc15	3.9	-0.0337	0.673	0.131	0.00212	0.00844	0.0338	0.0354	0.916	0.898	0.907
Ubtd2	3.2	-0.115	0.141	0.172	0.00164	0.00831	0.0356	0.036	0.916	0.898	0.907
Sec11a	3.85	0.00251	0.991	-0.2	-0.00145	0.00826	0.0343	0.0362	0.916	0.898	0.907
Pxdn	7.22	-0.0413	0.553	-0.121	-0.00247	0.00857	0.0355	0.0366	0.916	0.898	0.907
Helz2	3	0.251	0.00916	-0.244	-0.00118	0.00821	0.0343	0.0366	0.916	0.898	0.907
Lrba	5.64	0.0198	0.711	-0.0841	-0.00355	0.00907	0.0327	0.038	0.914	0.902	0.908
Lgals1	3.09	0.0723	0.581	-0.226	-0.00126	0.00822	0.0361	0.037	0.916	0.899	0.908
Cdk5rap2	4.9	-0.0322	0.751	-0.151	-0.0019	0.00837	0.0358	0.0372	0.916	0.899	0.908
Zfp449	2.69	-0.265	0.000472	-0.206	-0.00135	0.00824	0.0357	0.0373	0.916	0.899	0.908
Gjc3	5.41	0.068	0.346	-0.143	-0.00205	0.00842	0.0343	0.0375	0.916	0.899	0.908
Phldb1	6.87	0.0274	0.614	-0.0914	-0.0033	0.00893	0.0334	0.038	0.915	0.902	0.908
Krt8	-0.275	0.409	0.275	-0.834	-0.000341	0.00811	0.0303	0.0386	0.914	0.904	0.909
Myo1c	4.43	0.0609	0.382	-0.136	-0.00214	0.00845	0.033	0.0386	0.914	0.904	0.909
Cinp	4.72	-0.0535	0.235	0.0983	0.00282	0.00871	0.0305	0.0389	0.914	0.904	0.909
Tmem39a	2.68	-0.0395	0.775	-0.207	-0.00136	0.00824	0.0342	0.0378	0.916	0.901	0.909
Ddx5	9.29	0.0448	0.0592	0.0529	0.00607	0.011	0.0453	0.0311	0.92	0.898	0.909
Ube2v1	7.44	-0.0346	0.247	0.0603	0.00528	0.0103	0.0412	0.0313	0.92	0.898	0.909
Abcf1	6.52	-0.0548	0.0144	0.0554	0.00571	0.0107	0.0373	0.0316	0.92	0.898	0.909
Sirpa	8.76	-0.0156	0.501	0.0372	0.0095	0.015	0.0589	0.0318	0.92	0.898	0.909
Rhbdd2	5.58	-0.0923	0.256	0.164	0.00179	0.00835	0.0388	0.0319	0.92	0.898	0.909
Chl1	8.25	-0.0196	0.572	0.0565	0.00553	0.0105	0.0456	0.032	0.92	0.898	0.909
Pappa2	1.63	-0.0895	0.798	0.51	0.000576	0.00812	0.0385	0.032	0.92	0.898	0.909
Phf20	7	-0.00371	0.96	0.0757	0.00397	0.00933	0.0412	0.0322	0.92	0.898	0.909
Pdcd5	4.11	-0.115	0.209	0.19	0.00152	0.00828	0.0414	0.0324	0.92	0.898	0.909
Sgip1	7.63	-0.0119	0.716	0.0468	0.00703	0.012	0.0503	0.0325	0.92	0.898	0.909
Aass	2.22	-0.0688	0.697	0.275	0.00104	0.00818	0.0378	0.0327	0.92	0.898	0.909
Sult1a1	3.46	0.101	0.367	0.212	0.00135	0.00824	0.0392	0.0327	0.92	0.898	0.909
Ptar1	2.26	-0.224	0.177	0.344	0.000839	0.00815	0.0416	0.0328	0.92	0.898	0.909
Rtca	5.19	-0.023	0.702	0.0934	0.00314	0.00887	0.0382	0.0329	0.92	0.898	0.909
Glmp	4.42	-0.112	0.18	0.178	0.00164	0.00831	0.0385	0.033	0.92	0.898	0.909
Lrfn3	4.64	0.0289	0.644	0.0972	0.00295	0.00877	0.0402	0.033	0.92	0.898	0.909
Adk	5.44	-0.0389	0.361	0.0818	0.00354	0.00907	0.0394	0.033	0.92	0.898	0.909
Lmbrd1	7.48	0.0116	0.752	0.0501	0.00612	0.0111	0.0526	0.0331	0.92	0.898	0.909
Rad21	6.87	-0.0369	0.1	0.0477	0.00649	0.0114	0.0481	0.0331	0.92	0.898	0.909
Rfng	5.84	0.0634	0.227	0.108	0.00272	0.00867	0.0401	0.0331	0.92	0.898	0.909
Pxmp2	1.75	0.0179	0.958	0.35	0.000794	0.00815	0.0465	0.0332	0.92	0.898	0.909
Cntnap5a	5.25	-0.0933	0.298	0.179	0.00165	0.00831	0.0383	0.0333	0.92	0.898	0.909
Tmem108	4.92	0.0439	0.538	0.122	0.0024	0.00854	0.0398	0.0334	0.92	0.898	0.909
Sec62	7.21	-0.0459	0.0152	0.0438	0.00734	0.0123	0.0498	0.0338	0.92	0.898	0.909
Mrpl10	5.65	-0.0192	0.714	0.0782	0.00368	0.00915	0.045	0.034	0.92	0.898	0.909
Stard6	0.611	-0.0506	0.893	0.463	0.000599	0.00813	0.0434	0.034	0.92	0.898	0.909
Grid1	6.57	0.00056	0.993	0.0583	0.00523	0.0102	0.0411	0.034	0.92	0.898	0.909
Nsg2	9.52	-0.00742	0.806	0.0382	0.00864	0.0138	0.0599	0.0343	0.92	0.898	0.909
Rab18	6.53	-0.0517	0.0527	0.0611	0.00491	0.00999	0.0406	0.0343	0.92	0.898	0.909
Dtd1	5.08	-0.0402	0.507	0.106	0.00271	0.00867	0.0415	0.0345	0.92	0.898	0.909
Pelp1	5.32	0.000557	0.995	0.0802	0.0036	0.00911	0.04	0.0346	0.92	0.898	0.909
Cnbp	7.53	0.023	0.422	0.0499	0.00603	0.011	0.0517	0.0347	0.92	0.898	0.909
Dmxl1	6.37	-0.0521	0.279	0.0956	0.00301	0.0088	0.0398	0.035	0.92	0.898	0.909
Pdxk	7.51	0.0169	0.687	0.0616	0.00474	0.00985	0.0498	0.035	0.92	0.898	0.909
Dcbld2	4.8	-0.0281	0.698	0.11	0.00255	0.0086	0.043	0.0351	0.92	0.898	0.909
Zcchc17	5.07	-0.0177	0.831	0.111	0.00251	0.00858	0.0474	0.0355	0.92	0.898	0.909
Fam49b	6.81	0.00948	0.857	0.0685	0.00422	0.00948	0.0455	0.0356	0.92	0.898	0.909
Hist2h4	1.41	-0.152	0.493	-0.384	-0.000739	0.00814	0.0411	0.0356	0.92	0.898	0.909
Ube2l3	7.19	-0.012	0.772	0.058	0.00508	0.0101	0.0455	0.0358	0.92	0.898	0.909
RP23-360A2.8	3.12	0.121	0.516	-0.314	-0.000867	0.00816	0.0488	0.0361	0.92	0.898	0.909
Frat1	3.86	0.0097	0.947	0.153	0.00181	0.00835	0.0425	0.0363	0.92	0.898	0.909
Ppip5k2	4.66	0.00726	0.947	0.115	0.00242	0.00855	0.0455	0.0363	0.92	0.898	0.909
Oxr1	8.36	-0.0581	0.0947	0.0744	0.00385	0.00925	0.0474	0.0364	0.92	0.898	0.909
Smarcal1	5.63	-0.00727	0.914	0.0772	0.0036	0.0091	0.0512	0.0366	0.92	0.898	0.909
Arhgap33	7.41	-0.00468	0.948	0.0746	0.00381	0.00922	0.0487	0.037	0.92	0.899	0.91
Nupl2	2.75	0.0967	0.431	0.227	0.00122	0.00821	0.0399	0.037	0.92	0.899	0.91
Adamts8	2.34	0.0906	0.524	-0.249	-0.00113	0.0082	0.0373	0.0373	0.92	0.899	0.91
Mfn1	6.42	-0.00798	0.861	0.0593	0.00491	0.00997	0.044	0.0374	0.92	0.899	0.91
Ncl	6.79	0.00518	0.937	0.0689	0.00408	0.00938	0.0526	0.0374	0.92	0.899	0.91
Foxo1	5.79	-0.00461	0.971	0.121	0.00229	0.0085	0.0465	0.0375	0.92	0.899	0.91
Rnf182	5.47	0.0313	0.698	-0.127	-0.00226	0.00849	0.0348	0.0391	0.916	0.904	0.91
AC163616.2	5.35	0.061	0.318	-0.124	-0.00234	0.00852	0.0342	0.0392	0.916	0.904	0.91
Hfm1	1.59	-0.11	0.634	0.376	0.000746	0.00814	0.0389	0.0376	0.92	0.901	0.911
Spty2d1	4.81	0.0767	0.136	-0.115	-0.00248	0.00857	0.0331	0.0399	0.914	0.907	0.911
Rcor1	5.15	0.0456	0.381	-0.101	-0.00284	0.00871	0.0329	0.0406	0.914	0.907	0.911
Cyth3	5.66	0.0377	0.397	-0.0861	-0.00336	0.00896	0.0328	0.0417	0.914	0.907	0.911
Zswim1	4.8	0.0125	0.887	0.108	0.00255	0.00859	0.0442	0.0381	0.92	0.902	0.911
Gldc	5.67	-0.0489	0.333	0.0966	0.00289	0.00874	0.0422	0.0382	0.92	0.902	0.911
Wbp11	6.86	0.0243	0.556	0.0665	0.00421	0.00946	0.0502	0.0383	0.92	0.902	0.911
C1ql3	6.6	-0.00482	0.948	0.0755	0.00367	0.00913	0.0501	0.0384	0.92	0.903	0.912
Lgalsl	6.1	-0.018	0.709	0.0694	0.004	0.00933	0.0495	0.0385	0.92	0.903	0.912
Nfasc	8.66	0.0253	0.517	-0.0697	-0.00433	0.00953	0.0339	0.0411	0.916	0.907	0.912
Pfkfb3	5.73	0.0158	0.88	-0.137	-0.00205	0.00842	0.0362	0.0413	0.916	0.907	0.912
Ppm1f	6.87	-0.0323	0.46	-0.081	-0.00359	0.00908	0.0352	0.0413	0.916	0.907	0.912
Abcb8	5.31	-0.0373	0.501	0.0957	0.00286	0.00872	0.044	0.0388	0.92	0.904	0.912
Mapre3	7.21	-0.0129	0.817	0.0748	0.00373	0.00916	0.0471	0.0388	0.92	0.904	0.912
Chga	7.12	-0.0231	0.655	0.0758	0.00366	0.00913	0.054	0.0389	0.92	0.904	0.912
Arl4a	4.84	0.0124	0.886	0.104	0.00256	0.0086	0.0506	0.0389	0.92	0.904	0.912
Rpl19	7.75	-0.0107	0.821	0.0617	0.00455	0.00969	0.0503	0.039	0.92	0.904	0.912
Nap1l5	7.84	-0.0122	0.892	0.107	0.00257	0.0086	0.0478	0.0391	0.92	0.904	0.912
Crtap	1.96	0.0416	0.84	-0.289	-0.000944	0.00817	0.0381	0.0393	0.92	0.905	0.912
Kcnh4	1.99	0.0353	0.898	-0.34	-0.000809	0.00815	0.0403	0.0393	0.92	0.905	0.912
Vcpip1	6.5	-0.0723	0.000512	0.0501	0.00561	0.0105	0.0576	0.0394	0.92	0.905	0.913
Mars2	4.76	-0.114	0.023	0.117	0.00232	0.00851	0.043	0.0396	0.92	0.907	0.914
Krt73	2.86	0.0322	0.815	-0.194	-0.00141	0.00825	0.036	0.042	0.916	0.911	0.914
Hspa4l	7.7	-0.055	0.0471	0.0604	0.00459	0.00971	0.0531	0.0397	0.92	0.907	0.914
Xpnpep1	3.9	0.0116	0.961	0.238	0.00112	0.00819	0.048	0.0398	0.92	0.907	0.914
Zmat2	7.12	-0.0235	0.582	0.0682	0.00406	0.00936	0.048	0.0399	0.92	0.907	0.914
Col6a6	0.0278	0.144	0.677	-0.535	-0.000491	0.00812	0.0382	0.0404	0.92	0.907	0.914
Aldh2	6.24	-0.0556	0.17	0.0808	0.00335	0.00895	0.051	0.0406	0.92	0.907	0.914
Atrip	3.31	0.246	0.134	0.353	0.000779	0.00815	0.0444	0.0406	0.92	0.907	0.914
Pccb	5.65	0.0233	0.666	0.0807	0.00335	0.00896	0.0499	0.0407	0.92	0.907	0.914
Rnf126	5.3	-0.0225	0.815	0.126	0.0021	0.00843	0.0485	0.0409	0.92	0.907	0.914
RP24-134N2.1	4.45	-0.0456	0.746	0.201	0.00133	0.00823	0.0497	0.041	0.92	0.907	0.914
Rundc3a	7.94	-0.0188	0.671	0.0644	0.00422	0.00945	0.0547	0.041	0.92	0.907	0.914
Pcdhga10	4.16	-0.00672	0.976	-0.226	-0.0012	0.00821	0.0425	0.0411	0.92	0.907	0.914
Wfs1	6.59	-0.125	0.437	0.295	0.000932	0.00817	0.0453	0.0412	0.92	0.907	0.914
Neo1	7.17	0.0149	0.679	0.0522	0.00532	0.0103	0.0551	0.0412	0.92	0.907	0.914
Dock6	4.8	0.0834	0.286	-0.153	-0.00181	0.00835	0.0411	0.0413	0.92	0.907	0.914
Pcdh11x	3.5	-0.101	0.362	0.202	0.00132	0.00823	0.0472	0.0413	0.92	0.907	0.914
Oxct1	8.18	-0.0127	0.644	0.0387	0.00746	0.0122	0.0674	0.0414	0.92	0.907	0.914
Cfb	2.1	0.0157	0.947	0.26	0.00104	0.00818	0.0405	0.0414	0.92	0.907	0.914
Appl1	6.89	-0.0733	0.00278	0.0596	0.00468	0.00977	0.0499	0.0415	0.92	0.907	0.914
Mak16	4.44	-0.0519	0.515	0.136	0.00195	0.00839	0.046	0.0415	0.92	0.907	0.914
Arhgap10	3.03	0.0186	0.909	0.199	0.00134	0.00823	0.0434	0.0416	0.92	0.907	0.914
Olfr1385	-0.644	-0.465	0.444	1.11	0.000227	0.0081	0.0522	0.0416	0.92	0.907	0.914
Mag	6.81	0.0916	0.129	-0.131	-0.00215	0.00845	0.0382	0.0416	0.92	0.907	0.914
Heyl	2.34	0.0756	0.675	0.281	0.000949	0.00817	0.0413	0.0416	0.92	0.907	0.914
Fgf11	5.91	-0.0308	0.59	-0.0974	-0.00293	0.00875	0.0344	0.0424	0.916	0.912	0.914
Enthd2	4.21	0.0528	0.475	-0.136	-0.00205	0.00842	0.0355	0.0434	0.916	0.912	0.914
Rab40b	4.87	0.0465	0.497	-0.122	-0.00228	0.00849	0.0367	0.0437	0.918	0.913	0.915
Otx2	-0.29	1.5	0.0326	-1.71	-0.000157	0.0081	0.104	0.0415	0.924	0.907	0.916
Nub1	6.55	0.0427	0.251	0.0708	0.00374	0.00916	0.0547	0.042	0.92	0.911	0.916
Vps9d1	4.84	0.107	0.407	0.231	0.00115	0.0082	0.05	0.042	0.92	0.911	0.916
Gpr162	7.16	0.0353	0.692	0.128	0.00206	0.00842	0.0523	0.0425	0.92	0.912	0.916
Nsdhl	4.42	-0.0331	0.635	0.113	0.00238	0.00853	0.0396	0.0425	0.92	0.912	0.916
Cstad	0.336	-0.134	0.679	0.493	0.000525	0.00812	0.0491	0.0426	0.92	0.912	0.916
Eif3f	6.43	-0.0278	0.492	0.0646	0.00406	0.00935	0.0631	0.0426	0.92	0.912	0.916
Slc12a9	5.21	0.038	0.435	0.0866	0.00311	0.00883	0.0451	0.0427	0.92	0.912	0.916
Paip1	5.81	-0.0657	0.032	0.069	0.00382	0.00921	0.0494	0.0428	0.92	0.912	0.916
Brsk1	8.3	-0.00458	0.908	0.0431	0.00645	0.0112	0.0663	0.0428	0.92	0.912	0.916
Tenm1	6.25	-0.052	0.538	0.137	0.00192	0.00838	0.0505	0.0429	0.92	0.912	0.916
Nup85	4.69	-0.0327	0.539	0.0874	0.00284	0.00871	0.0528	0.0429	0.92	0.912	0.916
Anapc5	6.82	0.0112	0.869	0.0826	0.00318	0.00886	0.0554	0.0429	0.92	0.912	0.916
Agt	4.82	0.0342	0.793	0.176	0.00149	0.00827	0.0495	0.043	0.92	0.912	0.916
Ugt8a	5.24	0.0325	0.77	-0.162	-0.00171	0.00832	0.039	0.043	0.92	0.912	0.916
Zcchc12	5.89	-0.00629	0.961	0.127	0.00208	0.00843	0.0508	0.0431	0.92	0.912	0.916
Tmem198b	2.74	0.0259	0.907	0.264	0.001	0.00818	0.0452	0.0431	0.92	0.912	0.916
Pagr1a	2.89	-0.179	0.718	-0.755	-0.000347	0.00811	0.0375	0.0432	0.92	0.912	0.916
Dirc2	5.42	0.0113	0.861	0.081	0.0032	0.00887	0.0511	0.0432	0.92	0.912	0.916
Mok	2.54	-0.0844	0.493	0.219	0.00121	0.00821	0.0396	0.0433	0.92	0.912	0.916
Map7d2	7.53	-0.0185	0.536	0.0471	0.00591	0.0107	0.0599	0.0435	0.92	0.912	0.916
Zfp169	4.23	-0.0219	0.857	-0.159	-0.00171	0.00832	0.0425	0.0435	0.92	0.912	0.916
Bcl6b	1.17	0.397	0.0227	-0.398	-0.000659	0.00813	0.0454	0.0435	0.92	0.912	0.916
Ppard	4.34	-0.0108	0.928	-0.139	-0.00197	0.00839	0.0389	0.0435	0.92	0.912	0.916
Tfdp2	5.51	0.0377	0.436	-0.0919	-0.00307	0.00881	0.0339	0.0443	0.916	0.917	0.916
Arfgef2	6.79	0.0419	0.111	-0.0589	-0.00506	0.01	0.0365	0.0444	0.916	0.917	0.916
Jam3	4.8	0.0422	0.421	-0.103	-0.00271	0.00865	0.0307	0.0446	0.914	0.919	0.916
Zfp266	5.48	-0.0455	0.373	-0.0958	-0.00287	0.00872	0.0396	0.0437	0.92	0.913	0.917
Plod1	4.6	-0.0153	0.899	-0.148	-0.00182	0.00835	0.041	0.0441	0.92	0.917	0.918
Cmpk2	4.21	-0.0657	0.268	0.114	0.00222	0.00847	0.0502	0.0441	0.92	0.917	0.918
Klf9	7.19	0.0982	0.000799	0.0695	0.00376	0.00916	0.0601	0.0442	0.92	0.917	0.918
Aaas	3.28	-0.0135	0.961	0.279	0.000956	0.00817	0.0454	0.0443	0.92	0.917	0.918
Ly6h	7.35	-0.0197	0.795	0.0989	0.00263	0.00862	0.0544	0.0444	0.92	0.917	0.918
Aimp1	5.08	0.0474	0.187	-0.0812	-0.0032	0.00886	0.0294	0.0502	0.912	0.927	0.919
Hkdc1	2.26	0.0613	0.732	-0.273	-0.000981	0.00817	0.0385	0.0446	0.92	0.919	0.92
Commd4	3.7	0.0324	0.909	0.327	0.000777	0.00814	0.0548	0.0447	0.92	0.919	0.92
Snrpa	5.57	-0.061	0.136	0.081	0.00318	0.00886	0.0554	0.0448	0.92	0.92	0.92
RP24-390L20.3	1.51	0.0662	0.793	0.434	0.000583	0.00812	0.0324	0.0483	0.914	0.927	0.92
Hacd1	2.49	0.0148	0.933	-0.208	-0.00125	0.00821	0.0329	0.0485	0.914	0.927	0.92
Syngr2	2.84	0.0496	0.62	-0.169	-0.00145	0.00825	0.0327	0.054	0.914	0.927	0.92
Ap1ar	6.1	-0.0336	0.54	-0.0939	-0.00295	0.00875	0.0396	0.0451	0.92	0.921	0.921
Mns1	2.39	-0.00274	0.993	-0.254	-0.00103	0.00818	0.0435	0.0451	0.92	0.921	0.921
Mccc1	3.95	0.107	0.393	-0.228	-0.00116	0.0082	0.0451	0.0452	0.92	0.921	0.921
Traf4	3.19	-0.000724	0.997	0.184	0.00139	0.00824	0.0481	0.0452	0.92	0.921	0.921
Ick	5.02	0.0601	0.283	-0.111	-0.00243	0.00854	0.041	0.0452	0.92	0.921	0.921
Selo	4.1	-0.032	0.669	0.117	0.00218	0.00846	0.0432	0.0453	0.92	0.921	0.921
Trp53bp1	6.97	-0.00131	0.983	0.0561	0.00461	0.0097	0.0608	0.0453	0.92	0.921	0.921
Galc	5.04	0.0241	0.661	-0.0879	-0.00305	0.00879	0.0365	0.0478	0.916	0.927	0.921
Gypc	0.702	-0.0486	0.866	0.401	0.000645	0.00813	0.0353	0.0487	0.916	0.927	0.921
Cmtr2	3.02	0.0729	0.395	-0.164	-0.00155	0.00828	0.0363	0.0494	0.916	0.927	0.921
Pcgf6	4.11	-0.0608	0.284	-0.116	-0.00222	0.00846	0.0349	0.051	0.916	0.927	0.921
Klhl13	4.56	-0.0317	0.723	0.129	0.00198	0.00839	0.0503	0.0455	0.92	0.923	0.922
RP23-444H18.3	3.87	0.163	0.435	-0.392	-0.000658	0.00813	0.0418	0.0455	0.92	0.923	0.922
Ict1	4.3	0.0263	0.818	0.15	0.0017	0.00832	0.051	0.0456	0.92	0.923	0.922
RP24-93H15.3	2.85	0.14	0.0511	-0.171	-0.00138	0.00824	0.0368	0.0645	0.92	0.927	0.923
St3gal2	7.14	-0.0188	0.532	0.0461	0.00574	0.0106	0.0658	0.0459	0.92	0.927	0.924
Elavl4	6.13	-0.0636	0.208	0.0984	0.00259	0.0086	0.0527	0.046	0.92	0.927	0.924
Mrrf	4.25	-0.0879	0.0818	0.109	0.00228	0.00849	0.0503	0.0462	0.92	0.927	0.924
Plekho2	4.23	-0.16	0.0499	0.18	0.0014	0.00825	0.0551	0.0463	0.92	0.927	0.924
Pbx4	0.978	-0.057	0.865	0.414	0.000595	0.00813	0.0549	0.0464	0.92	0.927	0.924
Atp5c1	7.44	-0.0182	0.399	0.0347	0.00755	0.0122	0.0769	0.0464	0.92	0.927	0.924
Casc3	6.44	0.014	0.772	-0.0689	-0.00409	0.00935	0.0403	0.0465	0.92	0.927	0.924
F5	1.84	1.51	0.0267	-1.5	-0.00018	0.0081	0.0643	0.0465	0.92	0.927	0.924
B3gat3	6.84	-0.0564	0.0314	0.0567	0.00457	0.00966	0.0582	0.0466	0.92	0.927	0.924
Txnrd2	3.58	-0.0341	0.766	0.161	0.00158	0.00829	0.0486	0.0467	0.92	0.927	0.924
Aco2	9.15	-0.00468	0.899	0.0397	0.00681	0.0115	0.0711	0.0467	0.92	0.927	0.924
Pcdh19	7.03	0.0034	0.97	0.0829	0.00303	0.00879	0.0587	0.0468	0.92	0.927	0.924
B3galt2	6.13	-0.0957	0.0471	0.105	0.00242	0.00854	0.0529	0.0468	0.92	0.927	0.924
Ndufb2	5.21	-0.0494	0.494	-0.127	-0.00209	0.00842	0.0408	0.0471	0.92	0.927	0.924
Atp5f1	7.17	-0.066	0.391	0.131	0.00189	0.00837	0.058	0.0472	0.92	0.927	0.924
Polr1c	4.03	-0.0376	0.689	0.14	0.00178	0.00833	0.0516	0.0477	0.92	0.927	0.924
Cdr2l	4.89	-0.00719	0.944	-0.109	-0.00241	0.00853	0.0421	0.0477	0.92	0.927	0.924
Pcdhga12	4.93	-0.0355	0.735	0.142	0.00176	0.00833	0.0574	0.0478	0.92	0.927	0.924
Fsip1	0.468	0.187	0.421	-0.404	-0.0006	0.00813	0.0511	0.0478	0.92	0.927	0.924
Speg	7.43	0.00944	0.802	-0.0521	-0.00566	0.0105	0.0408	0.0478	0.92	0.927	0.924
Cadm1	8.24	-0.0179	0.767	0.0795	0.00316	0.00884	0.0601	0.048	0.92	0.927	0.924
Cep350	6.41	-0.0616	0.134	-0.0884	-0.00306	0.0088	0.0404	0.0482	0.92	0.927	0.924
Setd1b	6.15	-0.0246	0.708	-0.098	-0.00275	0.00866	0.0401	0.0482	0.92	0.927	0.924
Chrnb1	1.36	0.177	0.359	-0.353	-0.000715	0.00814	0.0471	0.0482	0.92	0.927	0.924
Cnn3	6.29	0.0112	0.836	-0.0737	-0.00373	0.00914	0.0409	0.0482	0.92	0.927	0.924
RP23-330D3.3	3.27	-0.0784	0.501	-0.205	-0.00125	0.00822	0.0449	0.0482	0.92	0.927	0.924
Mpv17l2	3.33	0.0571	0.551	-0.162	-0.00159	0.00829	0.0406	0.0482	0.92	0.927	0.924
Bag3	3.28	0.0488	0.653	-0.165	-0.00154	0.00827	0.0447	0.0485	0.92	0.927	0.924
Tpbg	3.55	0.00918	0.969	0.223	0.00113	0.00819	0.0525	0.0486	0.92	0.927	0.924
Ckmt1	7.62	-0.0454	0.104	0.0545	0.00465	0.00971	0.0687	0.0486	0.92	0.927	0.924
Chmp4b	7.01	-0.039	0.192	0.056	0.00444	0.00957	0.0649	0.0487	0.92	0.927	0.924
Cyp46a1	7.21	-0.016	0.758	0.0678	0.00367	0.00911	0.0634	0.0487	0.92	0.927	0.924
Mndal	1.95	0.0814	0.679	-0.293	-0.000857	0.00815	0.0498	0.0489	0.92	0.927	0.924
RP23-313J14.6	1.09	-0.0578	0.833	0.367	0.000673	0.00813	0.0494	0.0489	0.92	0.927	0.924
Zbtb48	2.34	-0.17	0.453	0.393	0.000643	0.00813	0.0517	0.049	0.92	0.927	0.924
Abat	8.33	-0.0124	0.765	0.0529	0.00479	0.0098	0.0681	0.049	0.92	0.927	0.924
Trpc4ap	7.49	0.0141	0.671	0.0455	0.00557	0.0104	0.0702	0.0491	0.92	0.927	0.924
Slc25a22	8.34	-0.00208	0.974	0.0578	0.00434	0.0095	0.065	0.0491	0.92	0.927	0.924
Col11a1	4.03	0.102	0.361	-0.202	-0.00127	0.00822	0.0471	0.0493	0.92	0.927	0.924
Bcas1	6.5	0.0457	0.635	-0.149	-0.00174	0.00833	0.0462	0.0494	0.92	0.927	0.924
Apoe	9.98	-0.023	0.475	0.051	0.00494	0.0099	0.0665	0.0495	0.92	0.927	0.924
RP23-103I12.10	5.47	-0.0263	0.765	0.117	0.0021	0.00843	0.0584	0.0495	0.92	0.927	0.924
Zbtb40	4.49	-0.012	0.933	-0.157	-0.00163	0.0083	0.046	0.0496	0.92	0.927	0.924
Hspe1	5.53	0.0185	0.795	-0.102	-0.00259	0.0086	0.0389	0.0499	0.92	0.927	0.924
Pdzd11	4.23	-0.0173	0.869	0.125	0.00192	0.00837	0.063	0.0499	0.92	0.927	0.924
Trappc6b	5.31	0.0188	0.774	0.0885	0.00279	0.00868	0.0535	0.05	0.92	0.927	0.924
Cldn2	0.415	1.31	0.0309	-1.3	-0.000186	0.0081	0.0692	0.0501	0.92	0.927	0.924
Traf3	7.04	0.0295	0.501	-0.0772	-0.00352	0.00902	0.0388	0.0501	0.92	0.927	0.924
Il1rapl2	1.27	-0.127	0.607	0.417	0.000597	0.00813	0.0462	0.0502	0.92	0.927	0.924
Rogdi	7.08	0.0274	0.518	0.067	0.00365	0.00909	0.0618	0.0505	0.92	0.927	0.924
Sh3d19	4.72	0.0289	0.775	-0.143	-0.00178	0.00833	0.0445	0.0505	0.92	0.927	0.924
Npas2	5.12	0.0233	0.835	0.144	0.00172	0.00832	0.0553	0.0507	0.92	0.927	0.924
Kmt2c	7.49	0.000353	0.996	-0.0755	-0.00358	0.00905	0.0442	0.0508	0.92	0.927	0.924
RP24-106M14.2	0.432	0.0789	0.766	0.393	0.000621	0.00813	0.0378	0.0509	0.92	0.927	0.924
Entpd4	6.38	-0.0386	0.557	0.101	0.00239	0.00852	0.063	0.0509	0.92	0.927	0.924
Glra3	2.32	-0.186	0.0819	0.22	0.00112	0.00819	0.0541	0.0509	0.92	0.927	0.924
Thap4	2.83	-0.0766	0.572	0.216	0.00113	0.00819	0.0533	0.0511	0.92	0.927	0.924
Atp9a	8.62	0.012	0.731	0.0444	0.00564	0.0104	0.0751	0.0511	0.92	0.927	0.924
Utp14a	4.21	-0.00579	0.96	-0.12	-0.00214	0.00844	0.0383	0.0512	0.92	0.927	0.924
Ptbp3	4.72	0.0477	0.546	-0.129	-0.00198	0.00839	0.0445	0.0513	0.92	0.927	0.924
Cdh20	4.48	-0.119	0.189	0.178	0.00137	0.00824	0.0572	0.0515	0.92	0.927	0.924
Mpnd	5.85	0.017	0.753	0.0718	0.00336	0.00894	0.0607	0.0516	0.92	0.927	0.924
Sik1	4.32	1.03	6.75e-25	0.185	0.0013	0.00822	0.0599	0.0516	0.92	0.927	0.924
Glud1	7.82	3.95e-05	1	0.0606	0.00401	0.00929	0.0706	0.0516	0.92	0.927	0.924
Tfap4	1.74	-0.414	3.15e-05	0.264	0.000954	0.00817	0.0428	0.0517	0.92	0.927	0.924
Egr2	1.87	1.69	7.96e-19	-0.412	-0.000588	0.00812	0.0519	0.0518	0.92	0.927	0.924
Ccnd2	6.89	-0.111	0.0398	-0.122	-0.00211	0.00843	0.0451	0.0518	0.92	0.927	0.924
Folr1	0.727	1.15	0.0989	-1.4	-0.000177	0.0081	0.0821	0.0518	0.92	0.927	0.924
Trib2	5.4	0.0477	0.5	0.113	0.00213	0.00844	0.0607	0.052	0.92	0.927	0.924
Camk2n2	5.97	-0.0828	0.205	0.123	0.00195	0.00838	0.0605	0.052	0.92	0.927	0.924
Mtmr10	4.39	0.0284	0.732	-0.119	-0.00212	0.00843	0.0494	0.0521	0.92	0.927	0.924
Shf	4.73	-0.078	0.22	0.119	0.00203	0.0084	0.0624	0.0521	0.92	0.927	0.924
Ankrd29	4.71	0.0136	0.92	-0.153	-0.00164	0.0083	0.0488	0.0521	0.92	0.927	0.924
Cpt1b	1.33	0.0679	0.847	-0.43	-0.00054	0.00812	0.0666	0.0521	0.92	0.927	0.924
Fam57a	3.67	-0.0296	0.763	-0.137	-0.0018	0.00834	0.0475	0.0522	0.92	0.927	0.924
Mcmdc2	1.61	0.0309	0.896	-0.288	-0.000863	0.00815	0.0444	0.0522	0.92	0.927	0.924
Cx3cl1	9.19	-0.0194	0.437	0.0385	0.00649	0.0111	0.0818	0.0523	0.92	0.927	0.924
Llgl2	0.234	-0.224	0.465	0.494	0.000474	0.00812	0.0587	0.0523	0.92	0.927	0.924
Rhbdd3	3.55	0.0206	0.935	-0.269	-0.000914	0.00816	0.0542	0.0525	0.92	0.927	0.924
Zfp69	0.399	0.0416	0.908	-0.425	-0.000566	0.00812	0.0492	0.0525	0.92	0.927	0.924
Ube2e3	5.85	-0.0341	0.37	0.0653	0.00363	0.00907	0.0605	0.0525	0.92	0.927	0.924
Sdf4	7.94	-0.00575	0.882	0.0415	0.006	0.0107	0.0817	0.0526	0.92	0.927	0.924
Eef2	10.1	-0.00777	0.829	0.0428	0.00573	0.0105	0.0718	0.0527	0.92	0.927	0.924
Cep170b	8.03	-0.0018	0.979	0.0623	0.00384	0.00918	0.072	0.0528	0.92	0.927	0.924
Tmem64	5.43	-0.0855	0.0141	-0.0862	-0.00307	0.00879	0.0371	0.0529	0.92	0.927	0.924
Ywhag	10.3	-0.0255	0.191	0.0343	0.00726	0.0117	0.0816	0.053	0.92	0.927	0.924
Syt10	2.73	-0.0273	0.902	0.247	0.000977	0.00817	0.0606	0.0531	0.92	0.927	0.924
Dhx33	6.36	0.0817	0.152	-0.118	-0.00215	0.00844	0.0464	0.0531	0.92	0.927	0.924
Flrt3	5.73	0.00591	0.954	0.0978	0.00243	0.00853	0.0605	0.0531	0.92	0.927	0.924
Frmd8	4.11	0.013	0.922	-0.147	-0.00168	0.00831	0.0521	0.0531	0.92	0.927	0.924
Cep70	4.63	0.0532	0.39	0.104	0.00221	0.00846	0.0669	0.0531	0.92	0.927	0.924
Arntl	4.82	-0.0374	0.611	0.109	0.00216	0.00844	0.0654	0.0532	0.92	0.927	0.924
Srl	3.53	0.112	0.186	-0.171	-0.00145	0.00826	0.0494	0.0533	0.92	0.927	0.924
Trip6	3.07	0.123	0.12	-0.171	-0.00145	0.00825	0.0413	0.0533	0.92	0.927	0.924
Eif5a	7.98	-0.0271	0.246	0.0408	0.00599	0.0107	0.0755	0.0535	0.92	0.927	0.924
Csnk1g2	6.93	-0.0246	0.538	0.0607	0.00392	0.00923	0.0659	0.0535	0.92	0.927	0.924
Fbxo34	6.13	0.0343	0.601	0.0986	0.00242	0.00853	0.0612	0.0536	0.92	0.927	0.924
Pten	7.56	-0.0242	0.571	0.0627	0.00379	0.00915	0.0701	0.0536	0.92	0.927	0.924
Olfr1344	0.385	0.0502	0.901	-0.467	-0.000505	0.00812	0.0515	0.0537	0.92	0.927	0.924
Ep400	7.13	0.0304	0.32	0.0513	0.00466	0.00969	0.0763	0.0538	0.92	0.927	0.924
Ercc2	5.07	0.039	0.548	-0.108	-0.00236	0.00851	0.0444	0.0538	0.92	0.927	0.924
Cc2d1a	6.03	0.00583	0.934	0.0687	0.00337	0.00894	0.072	0.0538	0.92	0.927	0.924
RP23-124N16.6	3.13	0.0362	0.802	-0.191	-0.00126	0.00822	0.0511	0.0541	0.92	0.927	0.924
Nrip2	4.27	-0.0292	0.758	0.129	0.00184	0.00835	0.0565	0.0541	0.92	0.927	0.924
Ppp6c	5.71	0.000586	0.996	-0.12	-0.0021	0.00842	0.0467	0.0542	0.92	0.927	0.924
Lrrc8b	6.82	0.00761	0.859	0.05	0.00481	0.00978	0.0688	0.0542	0.92	0.927	0.924
Timm9	4.88	0.0126	0.883	-0.107	-0.00234	0.0085	0.0465	0.0542	0.92	0.927	0.924
Zfp326	4.5	0.0425	0.663	-0.147	-0.00169	0.00831	0.0484	0.0542	0.92	0.927	0.924
Thy1	9.12	-0.0284	0.341	0.0487	0.0049	0.00984	0.0781	0.0544	0.92	0.927	0.924
Igf2r	6.11	0.0594	0.138	-0.0825	-0.00309	0.0088	0.0484	0.0548	0.92	0.927	0.924
AC126938.1	9.04	-0.0122	0.719	0.043	0.00556	0.0103	0.0815	0.055	0.92	0.927	0.924
Ugdh	4.5	-0.0534	0.509	-0.135	-0.00182	0.00834	0.0509	0.055	0.92	0.927	0.924
Hba-a2	4.43	-0.0719	0.846	0.498	0.000494	0.00812	0.0519	0.055	0.92	0.927	0.924
Ngrn	3.76	-0.0566	0.695	0.204	0.00115	0.0082	0.0635	0.055	0.92	0.927	0.924
Nrcam	8.12	0.021	0.663	0.066	0.00357	0.00903	0.0705	0.055	0.92	0.927	0.924
Col6a5	1.54	0.193	0.297	-0.341	-0.000707	0.00814	0.0535	0.0551	0.92	0.927	0.924
Phkb	5.13	-0.0269	0.647	0.0871	0.00273	0.00865	0.0558	0.0551	0.92	0.927	0.924
Knstrn	1.3	0.0483	0.871	-0.359	-0.000651	0.00813	0.0539	0.0551	0.92	0.927	0.924
Evi5l	6.67	-0.00542	0.935	-0.0728	-0.00356	0.00903	0.0428	0.0551	0.92	0.927	0.924
Dhodh	4.08	-0.00507	0.974	-0.148	-0.00166	0.0083	0.0484	0.0552	0.92	0.927	0.924
Ngb	1.62	0.0496	0.838	0.303	0.000766	0.00814	0.0597	0.0554	0.92	0.927	0.924
C1ra	1.57	0.142	0.308	-0.281	-0.000877	0.00816	0.0378	0.0554	0.92	0.927	0.924
Pdha1	7.96	-0.0296	0.18	0.0387	0.00628	0.0109	0.0849	0.0556	0.92	0.927	0.924
Dnaic2	1.12	0.168	0.439	-0.383	-0.000613	0.00813	0.0507	0.0557	0.92	0.927	0.924
Cfp	4.04	-0.146	0.14	-0.201	-0.0012	0.0082	0.051	0.0557	0.92	0.927	0.924
Upf3a	4.84	-0.0584	0.452	0.125	0.00185	0.00835	0.068	0.0557	0.92	0.927	0.924
Sparcl1	10.8	-0.034	0.272	0.0528	0.00444	0.00953	0.077	0.0558	0.92	0.927	0.924
Map2	10.6	-0.0155	0.575	0.0385	0.0062	0.0108	0.085	0.0558	0.92	0.927	0.924
Mdm4	6.89	-0.00357	0.956	-0.0649	-0.00395	0.00924	0.0517	0.0558	0.92	0.927	0.924
Fam120b	6.46	-0.0214	0.497	0.0501	0.00471	0.0097	0.0636	0.0561	0.92	0.927	0.924
Pfdn5	6.26	-0.0335	0.549	0.0849	0.00272	0.00864	0.068	0.0561	0.92	0.927	0.924
Ngfr	1.03	-0.0354	0.907	0.348	0.000648	0.00813	0.057	0.0562	0.92	0.927	0.924
Ebpl	3.79	0.0331	0.727	-0.138	-0.00177	0.00833	0.0441	0.0563	0.92	0.927	0.924
Gm21897	3.5	-0.065	0.696	0.216	0.00104	0.00818	0.0767	0.0563	0.92	0.927	0.924
Ctdsp1	4.52	-0.0809	0.211	0.122	0.0019	0.00836	0.0616	0.0563	0.92	0.927	0.924
Mtpap	4.59	0.0161	0.828	0.0941	0.00245	0.00854	0.0573	0.0563	0.92	0.927	0.924
Desi1	6.8	-0.00642	0.948	-0.102	-0.00244	0.00854	0.0514	0.0565	0.92	0.927	0.924
Rad1	2.86	-0.0227	0.894	-0.205	-0.00118	0.0082	0.048	0.0565	0.92	0.927	0.924
Pak3	7.31	-0.0353	0.334	0.0613	0.00377	0.00913	0.0719	0.0566	0.92	0.927	0.924
Myt1	4.39	-0.0345	0.668	0.111	0.00205	0.00841	0.0698	0.0566	0.92	0.927	0.924
Pgam1	8.87	-0.00422	0.893	0.0317	0.00748	0.0117	0.09	0.0567	0.92	0.927	0.924
Elk4	4.69	0.0521	0.27	-0.0926	-0.00264	0.00861	0.044	0.0568	0.92	0.927	0.924
Nlgn1	6.39	-0.018	0.752	0.0728	0.00317	0.00883	0.0689	0.057	0.92	0.927	0.924
Tbck	5.43	-0.0444	0.468	0.0985	0.00233	0.0085	0.0632	0.0571	0.92	0.927	0.924
Nsa2	5.47	0.0146	0.824	0.0815	0.00282	0.00868	0.0649	0.0571	0.92	0.927	0.924
Kcnk13	2.48	0.0579	0.677	-0.206	-0.00115	0.0082	0.0492	0.0571	0.92	0.927	0.924
Ikzf4	4.46	-0.0335	0.746	-0.141	-0.00171	0.00831	0.056	0.0571	0.92	0.927	0.924
Ccdc170	0.673	0.248	0.344	-0.46	-0.0005	0.00812	0.0557	0.0571	0.92	0.927	0.924
Atp7a	3.05	0.0393	0.806	-0.213	-0.0011	0.00819	0.0516	0.0574	0.92	0.927	0.924
Ckap5	7.67	0.00772	0.806	0.0358	0.00637	0.0109	0.0917	0.0575	0.92	0.927	0.924
Flna	6.78	0.205	0.024	-0.209	-0.00115	0.0082	0.0474	0.0575	0.92	0.927	0.924
Gpam	5.72	0.0296	0.558	-0.0838	-0.00299	0.00875	0.0452	0.0575	0.92	0.927	0.924
Snap29	4.86	-0.0789	0.141	-0.112	-0.00217	0.00844	0.0482	0.0576	0.92	0.927	0.924
Aes	8.13	-0.031	0.387	0.057	0.00403	0.00927	0.0785	0.0578	0.92	0.927	0.924
Fam160b1	5.51	-0.00228	0.978	-0.083	-0.00295	0.00873	0.0504	0.0582	0.92	0.927	0.924
Ptprc	1.57	0.0974	0.666	-0.323	-0.000721	0.00814	0.0632	0.0583	0.92	0.927	0.924
Atl3	5.46	-0.0309	0.533	-0.0812	-0.00302	0.00876	0.05	0.0583	0.92	0.927	0.924
Gap43	7.36	-0.0451	0.489	0.102	0.00225	0.00847	0.0682	0.0583	0.92	0.927	0.924
Garem1	5.91	0.0359	0.41	0.0719	0.00321	0.00885	0.0659	0.0583	0.92	0.927	0.924
Tmco4	1.65	-0.0323	0.887	0.263	0.000851	0.00815	0.0625	0.0583	0.92	0.927	0.924
Skp2	3.26	-0.154	0.0298	-0.155	-0.00147	0.00826	0.0573	0.0584	0.92	0.927	0.924
Pbld2	0.161	0.0221	0.96	0.442	0.000503	0.00812	0.0494	0.0585	0.92	0.927	0.924
Syndig1l	2.44	-0.0284	0.872	0.212	0.0011	0.00819	0.0539	0.0585	0.92	0.927	0.924
Immt	7.06	-0.00224	0.965	0.0468	0.00503	0.00991	0.0708	0.0585	0.92	0.927	0.924
Clcc1	4.45	-0.0138	0.867	0.0986	0.00227	0.00847	0.0616	0.0585	0.92	0.927	0.924
Atg10	2.72	-0.0429	0.829	0.244	0.000919	0.00816	0.0643	0.0586	0.92	0.927	0.924
Slc12a2	6.15	0.09	0.0509	-0.1	-0.00243	0.00853	0.0513	0.0586	0.92	0.927	0.924
Krt18	-0.521	0.726	0.211	-1.26	-0.000205	0.0081	0.0424	0.0588	0.92	0.927	0.924
RP23-15I21.8	2	-0.0207	0.92	-0.226	-0.000984	0.00817	0.0569	0.0588	0.92	0.927	0.924
Ikbip	3	0.122	0.268	-0.203	-0.00116	0.0082	0.0545	0.0588	0.92	0.927	0.924
Cep250	5.63	0.0132	0.889	0.102	0.0022	0.00845	0.0753	0.0589	0.92	0.927	0.924
AC159092.1	1.14	1.17	0.0493	-1.19	-0.000194	0.0081	0.0884	0.059	0.92	0.927	0.924
Chmp5	5.87	-0.0896	0.00242	0.0666	0.00338	0.00892	0.0718	0.0591	0.92	0.927	0.924
RP23-330D3.9	2.12	-0.0221	0.932	0.256	0.000856	0.00815	0.0735	0.0591	0.92	0.927	0.924
Nsrp1	4.14	-0.13	0.0536	0.136	0.00167	0.0083	0.0725	0.0591	0.92	0.927	0.924
Phlda3	3.08	0.022	0.897	-0.202	-0.00117	0.0082	0.0518	0.0593	0.92	0.927	0.924
Lig4	3.93	-0.0932	0.122	-0.124	-0.00186	0.00835	0.0532	0.0595	0.92	0.927	0.924
Ints11	4.66	-0.00628	0.948	0.095	0.00238	0.00851	0.0641	0.0598	0.92	0.927	0.924
Tbc1d2	2.61	-0.18	0.23	-0.287	-0.000804	0.00815	0.0551	0.0599	0.92	0.927	0.924
Zcchc7	6.15	0.0374	0.381	-0.0773	-0.00317	0.00882	0.0468	0.0599	0.92	0.927	0.924
Tipin	3.02	0.0117	0.952	0.191	0.00118	0.0082	0.0634	0.0599	0.92	0.927	0.924
Nup50	5.48	-0.0497	0.206	-0.0808	-0.00302	0.00876	0.0433	0.0599	0.92	0.927	0.924
Pde8a	4.07	0.135	0.0569	-0.153	-0.00154	0.00827	0.0554	0.0599	0.92	0.927	0.924
Mterf2	3.64	-0.107	0.0511	0.122	0.00182	0.00834	0.0514	0.0599	0.92	0.927	0.924
Vipr1	4.96	-0.0131	0.917	-0.139	-0.00171	0.00831	0.0565	0.06	0.92	0.927	0.924
Dpagt1	3.5	-0.0371	0.835	0.22	0.00101	0.00817	0.0692	0.06	0.92	0.927	0.924
Xaf1	1.26	0.135	0.43	-0.317	-0.000731	0.00814	0.0433	0.06	0.92	0.927	0.924
Gck	1.24	0.0594	0.786	0.287	0.000788	0.00814	0.0538	0.06	0.92	0.927	0.924
Ubald1	6.59	0.0213	0.659	0.0651	0.00348	0.00898	0.0725	0.0601	0.92	0.927	0.924
RP23-185B14.1	0.713	-0.0818	0.781	0.372	0.000581	0.00812	0.0726	0.0601	0.92	0.927	0.924
Ldlrad3	3.69	0.0503	0.573	0.14	0.00167	0.0083	0.0537	0.0601	0.92	0.927	0.924
Dtx3l	2.86	0.0279	0.822	-0.152	-0.00144	0.00825	0.0627	0.0602	0.92	0.927	0.924
Plxdc2	5.02	-0.075	0.155	0.098	0.00223	0.00846	0.0733	0.0603	0.92	0.927	0.924
Brd9	5.75	0.134	0.0113	0.116	0.00195	0.00837	0.069	0.0604	0.92	0.927	0.924
Tbx2	1.02	0.0267	0.923	0.292	0.000771	0.00814	0.0527	0.0605	0.92	0.927	0.924
AI846148	4.83	0.0162	0.826	-0.0958	-0.00248	0.00854	0.0505	0.0605	0.92	0.927	0.924
Ksr1	7.77	0.0692	0.168	-0.099	-0.00243	0.00853	0.0524	0.0606	0.92	0.927	0.924
Mfsd5	4.92	0.0453	0.359	-0.0922	-0.00263	0.0086	0.0427	0.0609	0.92	0.927	0.924
Bzrap1	8.36	0.0287	0.521	-0.0723	-0.0034	0.00893	0.0538	0.0611	0.92	0.927	0.924
Dbndd2	6.55	0.0828	0.0495	-0.0934	-0.00257	0.00858	0.0503	0.0611	0.92	0.927	0.924
Mtmr6	7.21	-0.00796	0.845	-0.0529	-0.00484	0.00976	0.0483	0.0611	0.92	0.927	0.924
Bcl11a	6.89	-0.00266	0.966	0.0538	0.00413	0.00932	0.0768	0.0611	0.92	0.927	0.924
Gss	4.15	-0.0645	0.278	0.109	0.00205	0.0084	0.0591	0.0611	0.92	0.927	0.924
Mal	7.35	0.0838	0.252	-0.137	-0.00172	0.00831	0.0577	0.0612	0.92	0.927	0.924
Spry4	4.38	0.0496	0.439	0.11	0.00211	0.00842	0.0551	0.0612	0.92	0.927	0.924
Gp1bb	2.87	0.0197	0.907	0.171	0.00123	0.00821	0.0763	0.0612	0.92	0.927	0.924
Ccdc117	4.26	-0.219	0.0133	-0.201	-0.00115	0.00819	0.0586	0.0613	0.92	0.927	0.924
Ctdp1	4.26	-0.016	0.864	0.11	0.00203	0.0084	0.0639	0.0613	0.92	0.927	0.924
Tert	1.28	0.174	0.774	-0.796	-0.000256	0.0081	0.0597	0.0614	0.92	0.927	0.924
Tsnaxip1	-0.318	0.345	0.232	-0.573	-0.000389	0.00811	0.0558	0.0614	0.92	0.927	0.924
Clic4	6.23	0.0832	0.00844	-0.0758	-0.00325	0.00886	0.0472	0.0614	0.92	0.927	0.924
Edrf1	5.29	-0.124	0.0057	-0.106	-0.0022	0.00845	0.0547	0.0615	0.92	0.927	0.924
Grik1	4.19	0.0138	0.922	0.147	0.00152	0.00827	0.0679	0.0616	0.92	0.927	0.924
St3gal5	6.67	-0.00449	0.936	0.0543	0.00409	0.0093	0.0772	0.0616	0.92	0.927	0.924
Dhfr	2.43	-0.0291	0.869	0.205	0.00106	0.00818	0.0674	0.0617	0.92	0.927	0.924
Cxx1c	5	-0.0706	0.229	0.107	0.00207	0.00841	0.0703	0.0618	0.92	0.927	0.924
Khsrp	6.79	-0.0193	0.611	-0.0571	-0.00435	0.00944	0.056	0.0619	0.92	0.927	0.924
Adgre5	3.55	0.0687	0.453	-0.157	-0.00149	0.00826	0.0534	0.0619	0.92	0.927	0.924
Hps3	3.84	0.0681	0.533	-0.176	-0.0013	0.00822	0.0586	0.062	0.92	0.927	0.924
Poldip3	6.2	-0.0184	0.629	0.0557	0.00419	0.00935	0.0624	0.062	0.92	0.927	0.924
Rsrp1	5.24	-0.438	0.0573	-0.486	-0.000448	0.00811	0.0551	0.0621	0.92	0.927	0.924
Phldb2	3.08	0.0475	0.695	-0.173	-0.0013	0.00822	0.0565	0.0621	0.92	0.927	0.924
Glul	10.6	0.0191	0.663	0.0584	0.00376	0.00911	0.0789	0.0621	0.92	0.927	0.924
Keap1	6.14	-0.0486	0.0538	0.0515	0.00434	0.00944	0.0664	0.0622	0.92	0.927	0.924
Cyth4	3.88	-0.00683	0.957	0.117	0.00185	0.00835	0.068	0.0625	0.92	0.927	0.924
Vim	4.91	0.114	0.142	-0.152	-0.0015	0.00826	0.0611	0.0626	0.92	0.927	0.924
Plekha3	5.42	-0.0109	0.887	-0.0915	-0.00256	0.00857	0.0502	0.0626	0.92	0.927	0.924
Gltp	4.78	0.0821	0.0749	-0.1	-0.00235	0.0085	0.0485	0.0627	0.92	0.927	0.924
H13	5.89	0.0191	0.696	-0.071	-0.00341	0.00893	0.0497	0.0627	0.92	0.927	0.924
Zfp474	-0.318	0.0508	0.933	-0.64	-0.000348	0.00811	0.0671	0.0627	0.92	0.927	0.924
Eda	2.88	-0.0148	0.924	0.171	0.00131	0.00822	0.0539	0.0628	0.92	0.927	0.924
Ccdc92b	5.09	-0.0207	0.771	-0.0968	-0.00245	0.00853	0.0525	0.0629	0.92	0.927	0.924
Fnip2	4.39	-0.000315	0.999	-0.179	-0.00128	0.00822	0.0585	0.0629	0.92	0.927	0.924
Rps12	6.01	0.112	0.545	-0.286	-0.000781	0.00814	0.0722	0.063	0.92	0.927	0.924
Thrap3	7.28	-0.033	0.345	0.055	0.00395	0.00921	0.0882	0.0632	0.92	0.927	0.924
Hrasls	3.56	0.00761	0.961	0.142	0.00149	0.00826	0.0735	0.0633	0.92	0.927	0.924
Fam126a	5.14	0.00179	0.984	-0.0864	-0.00272	0.00863	0.0478	0.0633	0.92	0.927	0.924
Suco	5.43	-0.0267	0.585	0.0691	0.00314	0.00881	0.0774	0.0633	0.92	0.927	0.924
Rnh1	4.91	0.0216	0.755	0.0878	0.0024	0.00852	0.0744	0.0634	0.92	0.927	0.924
Pick1	5.19	-0.0235	0.729	0.0879	0.00248	0.00854	0.0726	0.0635	0.92	0.927	0.924
Zfp354b	2.02	-0.252	0.0361	-0.257	-0.000843	0.00815	0.063	0.0635	0.92	0.927	0.924
Nrde2	4.14	0.106	0.111	0.129	0.00167	0.0083	0.0686	0.0635	0.92	0.927	0.924
Rusc1	7.22	-0.0341	0.298	0.0539	0.00405	0.00927	0.0846	0.0636	0.92	0.927	0.924
U2surp	6.19	0.0207	0.692	0.0667	0.00321	0.00884	0.0823	0.0637	0.92	0.927	0.924
Socs4	4.17	-0.0857	0.177	-0.119	-0.0019	0.00836	0.0618	0.0638	0.92	0.927	0.924
Rhbdf1	3.56	-0.0137	0.938	0.174	0.00126	0.00821	0.0704	0.0638	0.92	0.927	0.924
Tubg2	5.23	0.0166	0.801	0.0833	0.00264	0.0086	0.0643	0.0638	0.92	0.927	0.924
Emc3	6.02	-0.0172	0.731	0.0646	0.00331	0.00888	0.0738	0.0639	0.92	0.927	0.924
Stk10	3.26	0.00795	0.963	-0.163	-0.00136	0.00823	0.0647	0.0639	0.92	0.927	0.924
Atp9b	5.72	0.0263	0.765	0.11	0.00197	0.00838	0.0748	0.064	0.92	0.927	0.924
Otud1	3.24	-0.157	0.0606	0.167	0.0013	0.00822	0.0677	0.064	0.92	0.927	0.924
Zfp41	3.39	-0.0985	0.152	-0.141	-0.0016	0.00828	0.0517	0.064	0.92	0.927	0.924
Kntc1	0.454	-0.121	0.657	0.383	0.000553	0.00812	0.0653	0.064	0.92	0.927	0.924
Ptgfrn	4.13	-0.0312	0.802	0.15	0.00143	0.00825	0.0787	0.0641	0.92	0.927	0.924
Grin3a	6.17	-0.0129	0.877	0.0931	0.00233	0.00849	0.0745	0.0641	0.92	0.927	0.924
Ecscr	0.993	0.21	0.209	-0.345	-0.000675	0.00813	0.0476	0.0642	0.92	0.927	0.924
Wnt5b	1.22	-0.109	0.481	0.263	0.000824	0.00815	0.0485	0.0643	0.92	0.927	0.924
Lrch4	4.31	-0.0915	0.666	0.291	0.000684	0.00813	0.075	0.0643	0.92	0.927	0.924
Kif7	1.7	0.0215	0.926	-0.245	-0.000899	0.00816	0.055	0.0643	0.92	0.927	0.924
Osgepl1	2.13	-0.186	0.344	0.337	0.000653	0.00813	0.0679	0.0643	0.92	0.927	0.924
Rps20	4.87	-0.0212	0.793	0.0943	0.00227	0.00847	0.0821	0.0644	0.92	0.927	0.924
Pcdha9	3.59	-0.0972	0.55	0.245	0.000908	0.00816	0.0679	0.0644	0.92	0.927	0.924
Ogfod3	2.09	-0.0658	0.657	0.213	0.00102	0.00817	0.0596	0.0644	0.92	0.927	0.924
RP24-548A15.1	0.376	-0.287	0.202	-0.428	-0.000519	0.00812	0.0665	0.0644	0.92	0.927	0.924
Kcnj2	2.87	-0.323	0.00192	0.237	0.000905	0.00816	0.0732	0.0646	0.92	0.927	0.924
Tmc6	2.08	-0.0803	0.752	0.318	0.00068	0.00813	0.0745	0.0647	0.92	0.927	0.924
Ddx24	7.62	0.03	0.302	0.0472	0.00458	0.00957	0.0883	0.0647	0.92	0.927	0.924
Nes	3.91	0.361	1.54e-06	-0.185	-0.00121	0.0082	0.0615	0.0648	0.92	0.927	0.924
Was	0.267	0.154	0.555	-0.432	-0.000517	0.00812	0.0491	0.0649	0.92	0.927	0.924
Mb21d2	4.65	0.0385	0.554	0.0957	0.0022	0.00845	0.0751	0.0649	0.92	0.927	0.924
Ccne1	3.81	-0.0707	0.309	-0.132	-0.00172	0.00831	0.0489	0.065	0.92	0.927	0.924
Pqbp1	5.64	-0.0348	0.444	0.0725	0.00304	0.00876	0.0714	0.0652	0.92	0.927	0.924
Cog5	5.75	-0.0485	0.207	0.072	0.00302	0.00875	0.0635	0.0652	0.92	0.927	0.924
Ppef2	0.144	-0.0584	0.9	-0.501	-0.000431	0.00811	0.0673	0.0652	0.92	0.927	0.924
Prps1	6.12	-0.0262	0.498	0.0592	0.00362	0.00903	0.0736	0.0654	0.92	0.927	0.924
Il15ra	0.863	0.333	0.365	-0.619	-0.000355	0.00811	0.0659	0.0655	0.92	0.927	0.924
Cript	4.85	-0.0437	0.567	0.115	0.00188	0.00835	0.0697	0.0656	0.92	0.927	0.924
Pth1r	2.56	-0.0422	0.867	0.294	0.00075	0.00814	0.0728	0.0656	0.92	0.927	0.924
Chid1	5.27	0.132	0.0181	0.117	0.00184	0.00834	0.0744	0.0656	0.92	0.927	0.924
Nrsn2	6.24	0.00438	0.968	0.0956	0.00225	0.00846	0.0774	0.0657	0.92	0.927	0.924
Impad1	6.87	-0.0106	0.758	0.0404	0.00529	0.01	0.091	0.0657	0.92	0.927	0.924
Apold1	3.16	2.05	8.03e-15	0.547	0.000396	0.00811	0.0897	0.0659	0.92	0.927	0.924
RP23-335F6.3	4.25	-0.0649	0.382	-0.128	-0.00175	0.00832	0.0603	0.0659	0.92	0.927	0.924
Ttll3	4.23	0.00477	0.976	-0.15	-0.00151	0.00826	0.0591	0.0659	0.92	0.927	0.924
Fcf1	3.05	0.0189	0.901	0.168	0.00125	0.00821	0.0706	0.066	0.92	0.927	0.924
Rab31	5.84	-0.0186	0.68	0.062	0.00347	0.00895	0.0683	0.0661	0.92	0.927	0.924
Glyctk	2.2	0.0615	0.734	-0.247	-0.000897	0.00816	0.06	0.0664	0.92	0.927	0.924
Ammecr1l	5.48	-0.0613	0.158	-0.0859	-0.00264	0.0086	0.0569	0.0667	0.92	0.927	0.924
Cox7a2l	6.71	-0.0149	0.652	0.0424	0.00485	0.00973	0.0941	0.0667	0.92	0.927	0.924
Pls1	3.37	-0.00594	0.968	-0.133	-0.00157	0.00828	0.0707	0.0667	0.92	0.927	0.924
Chic2	3.78	0.0983	0.0869	0.112	0.00188	0.00835	0.0679	0.0668	0.92	0.927	0.924
St3gal3	5.57	-0.0453	0.202	0.0649	0.00327	0.00886	0.0709	0.0668	0.92	0.927	0.924
Tbc1d25	3.71	0.00531	0.976	0.158	0.00134	0.00823	0.0721	0.0669	0.92	0.927	0.924
Slk	6.99	0.00375	0.935	0.0433	0.00487	0.00974	0.0858	0.067	0.92	0.927	0.924
Zfp758	3.15	-0.106	0.182	-0.148	-0.00145	0.00825	0.0631	0.067	0.92	0.927	0.924
Akip1	1.03	0.131	0.557	-0.36	-0.000619	0.00813	0.0537	0.067	0.92	0.927	0.924
Nrbp2	6.6	0.139	0.41	-0.291	-0.000763	0.00814	0.0566	0.067	0.92	0.927	0.924
Kctd11	1.14	-0.11	0.487	-0.282	-0.000775	0.00814	0.0407	0.0671	0.92	0.927	0.924
Mef2c	7.06	-0.0592	0.484	0.131	0.00167	0.0083	0.0741	0.0671	0.92	0.927	0.924
Ssfa2	5.12	0.0481	0.822	-0.273	-0.000822	0.00815	0.0472	0.0672	0.92	0.927	0.924
Trem2	2.87	-0.00342	0.988	0.188	0.00114	0.00819	0.0661	0.0672	0.92	0.927	0.924
Pde6d	4.51	-0.0341	0.681	-0.121	-0.00188	0.00835	0.0547	0.0673	0.92	0.927	0.924
Anapc11	4.88	0.0291	0.651	0.0866	0.0024	0.00851	0.0786	0.0673	0.92	0.927	0.924
Tgds	2.25	-0.0971	0.493	-0.226	-0.000944	0.00816	0.0661	0.0674	0.92	0.927	0.924
Ep300	6.87	0.0128	0.745	-0.0554	-0.00444	0.00947	0.0479	0.0675	0.92	0.927	0.924
Cd53	2.26	0.0427	0.796	-0.213	-0.00102	0.00817	0.0595	0.0675	0.92	0.927	0.924
Myo9b	6.67	0.0336	0.412	-0.069	-0.00336	0.0089	0.0595	0.0675	0.92	0.927	0.924
Lrrc46	0.0283	-0.0267	0.951	-0.463	-0.000468	0.00812	0.051	0.0676	0.92	0.927	0.924
Uqcrb	5.72	-0.0719	0.109	0.085	0.00247	0.00853	0.0786	0.0678	0.92	0.927	0.924
Celsr2	8.86	0.0119	0.744	0.0434	0.00487	0.00974	0.0935	0.0678	0.92	0.927	0.924
Fzd9	2.12	0.0434	0.81	0.219	0.000969	0.00817	0.0687	0.0678	0.92	0.927	0.924
Ccdc93	6.05	0.0041	0.961	-0.0808	-0.00282	0.00866	0.0571	0.0679	0.92	0.927	0.924
Actn3	0.107	-0.212	0.518	0.538	0.000402	0.00811	0.0641	0.068	0.92	0.927	0.924
S100a11	1.5	0.0176	0.96	-0.333	-0.000673	0.00813	0.0623	0.068	0.92	0.927	0.924
Themis2	0.252	0.0765	0.802	-0.426	-0.000524	0.00812	0.0452	0.0683	0.92	0.927	0.924
Coa5	6.4	0.0268	0.413	-0.0581	-0.00408	0.00926	0.0491	0.0684	0.92	0.927	0.924
Slc26a11	2.42	-0.0967	0.495	0.217	0.000945	0.00816	0.078	0.0684	0.92	0.927	0.924
Igflr1	0.261	0.183	0.837	-1.3	-0.000163	0.0081	0.0396	0.0684	0.92	0.927	0.924
Rlim	6.24	-0.0188	0.671	0.0557	0.00367	0.00905	0.0944	0.0684	0.92	0.927	0.924
Arl3	5.85	-0.0752	0.182	0.0979	0.00213	0.00842	0.0845	0.0686	0.92	0.927	0.924
Nop2	4.95	0.0175	0.798	-0.0897	-0.00249	0.00854	0.0553	0.0687	0.92	0.927	0.924
Neurl1b	6.11	-0.0284	0.718	-0.108	-0.00209	0.00841	0.0577	0.0688	0.92	0.927	0.924
Ogg1	1.65	-0.0432	0.916	0.447	0.000484	0.00812	0.0707	0.0688	0.92	0.927	0.924
Ago4	4.33	-0.025	0.748	-0.108	-0.00208	0.00841	0.0508	0.0689	0.92	0.927	0.924
Ppa1	6	-0.0491	0.136	0.0619	0.00341	0.00892	0.0727	0.069	0.92	0.927	0.924
Dld	6.82	-0.0245	0.467	0.049	0.00424	0.00936	0.0921	0.069	0.92	0.927	0.924
Itga10	2.87	-0.0878	0.656	-0.278	-0.00078	0.00814	0.0659	0.0691	0.92	0.927	0.924
Lcmt2	2.9	0.202	0.0495	0.207	0.00102	0.00817	0.0731	0.0691	0.92	0.927	0.924
Ppm1h	6.5	-0.00137	0.986	-0.067	-0.00345	0.00894	0.0595	0.0691	0.92	0.927	0.924
Sos1	6.36	0.0217	0.489	-0.0506	-0.00448	0.00949	0.0588	0.0692	0.92	0.927	0.924
Bicral	6.69	-0.0326	0.386	0.0573	0.00355	0.00899	0.0913	0.0692	0.92	0.927	0.924
Slc20a2	5.68	0.0308	0.596	0.0807	0.00258	0.00857	0.0825	0.0694	0.92	0.927	0.924
Adam8	2.46	0.000188	1	-0.348	-0.00061	0.00813	0.0704	0.0695	0.92	0.927	0.924
Dnah2	3.23	0.0569	0.669	-0.188	-0.00115	0.00819	0.0628	0.0695	0.92	0.927	0.924
RP23-114E15.3	0.489	-0.214	0.32	0.401	0.000555	0.00812	0.0519	0.0695	0.92	0.927	0.924
Zfp719	4.29	-0.113	0.0197	-0.114	-0.00202	0.00839	0.048	0.0695	0.92	0.927	0.924
Zscan26	6.86	-0.0562	0.0684	-0.0642	-0.00356	0.00899	0.0594	0.0696	0.92	0.927	0.924
Fam98a	5.19	0.0174	0.787	-0.0851	-0.00264	0.00859	0.0568	0.0697	0.92	0.927	0.924
Pcgf3	5.9	-0.0326	0.456	-0.0733	-0.00306	0.00876	0.0554	0.0698	0.92	0.927	0.924
Foxq1	1.98	-0.255	0.0695	0.264	0.000779	0.00814	0.0805	0.0698	0.92	0.927	0.924
Tcf12	5.83	0.00669	0.938	-0.0893	-0.00252	0.00855	0.0577	0.0699	0.92	0.927	0.924
Pcnt	5.2	-0.0219	0.861	0.139	0.00149	0.00826	0.0808	0.07	0.92	0.927	0.924
Zbtb8b	2.44	-0.0191	0.911	-0.195	-0.00111	0.00819	0.0573	0.0701	0.92	0.927	0.924
AC138640.3	-0.0968	0.101	0.778	-0.459	-0.000465	0.00811	0.0561	0.0701	0.92	0.927	0.924
Clta	7.08	-0.0231	0.46	0.0453	0.00449	0.00949	0.0962	0.0701	0.92	0.927	0.924
Myo1d	3.86	0.115	0.102	-0.136	-0.00156	0.00827	0.0724	0.0701	0.92	0.927	0.924
Cct3	6.74	-0.0116	0.775	0.0508	0.0042	0.00932	0.0739	0.0701	0.92	0.927	0.924
Fes	1.12	-0.144	0.617	0.379	0.000544	0.00812	0.09	0.0704	0.92	0.927	0.924
Acvr2a	6.25	-0.000873	0.995	0.102	0.00205	0.0084	0.0781	0.0705	0.92	0.927	0.924
Gmip	3.67	0.00139	0.993	-0.142	-0.00152	0.00826	0.0612	0.0706	0.92	0.927	0.924
Sfswap	5.66	0.059	0.645	0.173	0.00122	0.0082	0.0757	0.0706	0.92	0.927	0.924
Nbas	5.67	0.0441	0.297	-0.0763	-0.00296	0.00872	0.0609	0.0707	0.92	0.927	0.924
Atpaf2	4.03	0.0357	0.665	0.116	0.00179	0.00833	0.0671	0.0708	0.92	0.927	0.924
Cdkl4	4.75	-0.0404	0.741	0.159	0.00133	0.00822	0.0754	0.0708	0.92	0.927	0.924
Pcdha3	3.29	0.0569	0.738	-0.222	-0.000964	0.00817	0.0683	0.0708	0.92	0.927	0.924
Hspa12b	2.81	-0.0637	0.607	0.174	0.00118	0.0082	0.0765	0.0708	0.92	0.927	0.924
Ptprt	7.51	-0.0155	0.832	0.0842	0.00245	0.00852	0.0849	0.0709	0.92	0.927	0.924
Timm44	4.56	0.00907	0.961	-0.171	-0.00126	0.00821	0.0671	0.0711	0.92	0.927	0.924
Pld3	8.94	-0.012	0.781	0.0503	0.00408	0.00926	0.092	0.0711	0.92	0.927	0.924
Erbb3	3.88	-0.0676	0.582	-0.183	-0.00118	0.0082	0.0678	0.0711	0.92	0.927	0.924
Pwwp2a	4.29	0.00268	0.983	-0.111	-0.00193	0.00836	0.0648	0.0712	0.92	0.927	0.924
Fam65a	7.16	0.00743	0.893	-0.0634	-0.00361	0.00901	0.0547	0.0714	0.92	0.927	0.924
RP23-388H13.4	5.73	-0.0265	0.586	0.0679	0.00302	0.00874	0.081	0.0714	0.92	0.927	0.924
Clec2l	5.33	-0.0316	0.434	0.0674	0.00313	0.00879	0.0611	0.0715	0.92	0.927	0.924
Cachd1	5.68	0.0518	0.422	-0.107	-0.00204	0.00839	0.062	0.0716	0.92	0.927	0.924
Fbxo6	3.67	0.059	0.382	-0.122	-0.00176	0.00832	0.0493	0.0716	0.92	0.927	0.924
Jak3	2.61	-0.0517	0.786	0.224	0.00092	0.00816	0.0787	0.0716	0.92	0.927	0.924
Zfp462	6.5	-0.018	0.775	-0.0811	-0.00274	0.00863	0.0619	0.0716	0.92	0.927	0.924
Tjp1	6.96	-0.00891	0.902	-0.0799	-0.00278	0.00864	0.0631	0.0718	0.92	0.927	0.924
Jpt2	2.34	0.0254	0.858	-0.188	-0.00115	0.00819	0.0445	0.0718	0.92	0.927	0.924
Ptprk	6.07	-0.0237	0.643	0.0671	0.00301	0.00874	0.0896	0.072	0.92	0.927	0.924
Wdr62	0.661	0.382	0.354	-0.669	-0.000308	0.00811	0.0751	0.072	0.92	0.927	0.924
Prrx1	3.13	0.0207	0.888	-0.163	-0.00129	0.00822	0.0674	0.0721	0.92	0.927	0.924
Cacng4	4.6	0.00132	0.992	0.101	0.00202	0.00839	0.0816	0.0722	0.92	0.927	0.924
Polr3a	5.21	0.0137	0.881	0.0991	0.00208	0.00841	0.0797	0.0722	0.92	0.927	0.924
Cend1	8.09	-0.0396	0.271	0.0581	0.00349	0.00895	0.095	0.0722	0.92	0.927	0.924
Fbxw7	7.36	-0.0461	0.0338	0.0408	0.00495	0.00976	0.0998	0.0722	0.92	0.927	0.924
Ppie	2.75	0.0425	0.831	0.232	0.000866	0.00815	0.0874	0.0723	0.92	0.927	0.924
Sptlc2	5.01	-0.0353	0.559	-0.0922	-0.00234	0.00849	0.0643	0.0723	0.92	0.927	0.924
Fam192a	5.24	-0.0203	0.732	0.0776	0.0027	0.00861	0.0713	0.0724	0.92	0.927	0.924
Spg20	5.17	-0.0663	0.138	-0.0872	-0.00248	0.00853	0.0626	0.0724	0.92	0.927	0.924
Rpl18a	6.37	-0.0586	0.295	0.0928	0.0022	0.00844	0.0832	0.0724	0.92	0.927	0.924
Yeats2	5.96	-0.0323	0.425	-0.0694	-0.00319	0.00881	0.0559	0.0725	0.92	0.927	0.924
RP23-219P13.3	1.07	0.0391	0.896	-0.331	-0.000636	0.00813	0.0678	0.0725	0.92	0.927	0.924
Chst10	6.09	-0.0633	0.057	0.0657	0.00309	0.00877	0.0805	0.0727	0.92	0.927	0.924
Cxxc1	5.62	0.0226	0.565	-0.0653	-0.00351	0.00896	0.0431	0.0727	0.92	0.927	0.924
Arsa	4.27	-0.12	0.299	0.19	0.00107	0.00818	0.0859	0.0727	0.92	0.927	0.924
Ogdhl	6.76	0.00492	0.933	0.0545	0.00363	0.00902	0.0918	0.0728	0.92	0.927	0.924
Olfr6	-0.148	0.0679	0.85	-0.438	-0.000451	0.00811	0.0576	0.0729	0.92	0.927	0.924
Ecel1	2.01	0.0638	0.828	0.336	0.00062	0.00813	0.0747	0.0729	0.92	0.927	0.924
Zfp454	2.2	-0.105	0.427	-0.178	-0.00105	0.00818	0.0629	0.0729	0.92	0.927	0.924
Tmod1	4.8	-0.0127	0.902	0.109	0.00186	0.00834	0.0825	0.073	0.92	0.927	0.924
Stra13	2.56	0.0472	0.749	-0.19	-0.00107	0.00818	0.0727	0.073	0.92	0.927	0.924
Sike1	5.86	0.0195	0.698	-0.0691	-0.00313	0.00878	0.0644	0.0731	0.92	0.927	0.924
Kpna3	6.69	-0.0185	0.58	0.0447	0.00445	0.00946	0.0964	0.0731	0.92	0.927	0.924
Resp18	5.61	-0.0341	0.665	0.102	0.00197	0.00837	0.0886	0.0731	0.92	0.927	0.924
Tubgcp3	4.85	0.0183	0.916	0.178	0.00116	0.00819	0.0784	0.0732	0.92	0.927	0.924
Fhl2	4.36	0.0604	0.498	0.133	0.00152	0.00826	0.0819	0.0732	0.92	0.927	0.924
Vma21	5.64	0.00469	0.961	0.0821	0.00247	0.00853	0.0854	0.0733	0.92	0.927	0.924
Ino80	5.39	0.0395	0.395	-0.0785	-0.00282	0.00866	0.0631	0.0733	0.92	0.927	0.924
Gtf2e2	3.68	-0.0174	0.896	-0.146	-0.00143	0.00824	0.0695	0.0734	0.92	0.927	0.924
Prr5l	3.14	0.0674	0.538	-0.163	-0.00129	0.00822	0.079	0.0736	0.92	0.928	0.924
Stk3	4.4	0.021	0.805	0.101	0.00202	0.00839	0.0783	0.0738	0.92	0.928	0.924
Ethe1	2.93	-0.0441	0.635	0.142	0.00142	0.00824	0.0513	0.0738	0.92	0.928	0.924
Coro1b	5.69	-0.0491	0.214	0.0687	0.00288	0.00868	0.0858	0.0739	0.92	0.928	0.924
Sfxn3	6.97	-0.0153	0.769	0.0616	0.00325	0.00883	0.0897	0.074	0.92	0.928	0.924
Slc37a3	5.75	-0.0285	0.604	0.0751	0.00268	0.0086	0.0868	0.0741	0.92	0.928	0.924
Snrnp48	2.71	0.139	0.22	-0.214	-0.000987	0.00817	0.0613	0.0741	0.92	0.928	0.924
Il10ra	2.1	0.147	0.518	-0.346	-0.000603	0.00813	0.0748	0.0743	0.92	0.928	0.924
Lrrtm4	5.22	-0.046	0.312	0.0742	0.0027	0.00861	0.0864	0.0743	0.92	0.928	0.924
Fah	4.3	0.0155	0.847	-0.103	-0.00206	0.0084	0.0543	0.0745	0.92	0.928	0.924
Fam53c	6.57	0.0162	0.734	-0.0653	-0.0034	0.0089	0.0574	0.0745	0.92	0.928	0.924
Spata5	3.44	-0.0716	0.349	0.125	0.00157	0.00827	0.0759	0.0746	0.92	0.928	0.924
Ubxn2b	6.01	-0.0766	0.0173	0.0662	0.00311	0.00877	0.0783	0.0746	0.92	0.928	0.924
Baz2b	5.35	-0.0432	0.427	-0.0905	-0.00239	0.0085	0.0629	0.0748	0.92	0.928	0.924
Tpm3	7.34	-0.00999	0.783	0.0415	0.00482	0.00966	0.0967	0.0749	0.92	0.928	0.924
Ankrd10	4.98	-0.00449	0.974	-0.121	-0.00175	0.00831	0.0687	0.0749	0.92	0.928	0.924
Zfp36l2	4.5	-0.0184	0.916	0.175	0.00115	0.00819	0.0803	0.075	0.92	0.928	0.924
Ten1	3.61	0.0287	0.781	-0.132	-0.00156	0.00827	0.0683	0.075	0.92	0.928	0.924
Epn1	8.77	-0.0127	0.755	0.0474	0.0042	0.0093	0.0963	0.075	0.92	0.928	0.924
Pmm1	6.74	-0.0546	0.0336	0.0502	0.00401	0.0092	0.0866	0.075	0.92	0.928	0.924
Pkia	7.28	-0.00872	0.89	0.0648	0.00307	0.00876	0.0877	0.0751	0.92	0.928	0.924
Spata24	1.59	-0.0253	0.918	0.266	0.000782	0.00814	0.0635	0.0752	0.92	0.928	0.924
Ypel2	5.49	-0.0693	0.168	-0.0949	-0.00227	0.00846	0.064	0.0752	0.92	0.928	0.924
Slc30a1	5.16	0.207	1.72e-06	0.0965	0.00208	0.0084	0.0882	0.0752	0.92	0.928	0.924
Shisa2	2.38	-0.09	0.526	0.204	0.000984	0.00817	0.0808	0.0754	0.92	0.928	0.924
AC160535.1	6.19	0.0257	0.55	0.0597	0.00326	0.00884	0.095	0.0754	0.92	0.928	0.924
Wdsub1	3.38	-0.0445	0.638	0.139	0.0015	0.00826	0.0597	0.0754	0.92	0.928	0.924
Nek6	5.5	0.0172	0.766	0.0686	0.00279	0.00864	0.0917	0.0756	0.92	0.928	0.924
Msl3l2	3.53	0.0636	0.498	0.14	0.00144	0.00825	0.0773	0.0758	0.92	0.928	0.924
Med15	6.06	0.0152	0.772	0.062	0.00316	0.00879	0.0888	0.0758	0.92	0.928	0.924
Hbs1l	5.68	0.0154	0.773	0.0688	0.00305	0.00875	0.0668	0.0759	0.92	0.928	0.924
Rgs6	3.93	-0.072	0.517	0.165	0.00121	0.0082	0.0832	0.0759	0.92	0.928	0.924
Cldnd1	5.67	-0.0247	0.53	0.0564	0.00345	0.00892	0.0871	0.0759	0.92	0.928	0.924
Nrp1	6.72	-0.0107	0.89	-0.0852	-0.00252	0.00854	0.0669	0.0761	0.92	0.928	0.924
F8a	3.5	0.0229	0.853	0.135	0.00144	0.00824	0.0893	0.0761	0.92	0.928	0.924
Dock8	2.73	0.0478	0.739	-0.187	-0.00111	0.00819	0.0696	0.0762	0.92	0.928	0.924
AC167815.1	7.34	0.0358	0.099	0.0383	0.00513	0.00984	0.0985	0.0762	0.92	0.928	0.924
Zfp382	3.81	-0.0298	0.823	-0.155	-0.00134	0.00823	0.0765	0.0763	0.92	0.928	0.924
Sertad3	1.01	-0.0933	0.682	-0.317	-0.000631	0.00813	0.0678	0.0766	0.92	0.928	0.924
Dclk2	6.99	0.0824	0.00264	-0.0636	-0.00347	0.00893	0.0612	0.0767	0.92	0.928	0.924
Mios	4.38	-0.082	0.117	0.0955	0.00202	0.00839	0.0886	0.0767	0.92	0.928	0.924
RP23-142A14.4	4.23	-0.0759	0.784	0.346	0.000578	0.00812	0.07	0.0767	0.92	0.928	0.924
Slc25a28	4.83	0.00305	0.974	0.0785	0.00253	0.00855	0.0767	0.0768	0.92	0.928	0.924
Cmas	6.11	-0.0169	0.688	0.0538	0.00364	0.00901	0.0887	0.0768	0.92	0.928	0.924
Chrm4	3.99	0.0475	0.731	-0.177	-0.00116	0.00819	0.0726	0.0769	0.92	0.928	0.924
Rhobtb2	6.27	-0.0323	0.605	0.0838	0.00234	0.00848	0.092	0.077	0.92	0.928	0.924
Myrf	5.85	0.103	0.056	-0.11	-0.00192	0.00836	0.0667	0.077	0.92	0.928	0.924
Eloc	6.4	-0.02	0.625	0.0544	0.00357	0.00898	0.0888	0.0771	0.92	0.928	0.924
Uty	3.37	-0.0278	0.874	0.818	0.000242	0.0081	0.0769	0.0771	0.92	0.928	0.924
Gper1	1.71	0.0329	0.854	-0.225	-0.000904	0.00816	0.0535	0.0772	0.92	0.928	0.924
Snrnp25	3	0.0204	0.87	-0.154	-0.00135	0.00823	0.053	0.0772	0.92	0.928	0.924
Sgms2	2.24	0.21	0.18	-0.296	-0.000701	0.00813	0.0644	0.0775	0.92	0.928	0.924
Tpm2	2.38	0.121	0.497	-0.268	-0.000744	0.00814	0.0818	0.0775	0.92	0.928	0.924
Fam8a1	6.74	-0.0611	0.0907	0.0654	0.00298	0.00871	0.0913	0.0777	0.92	0.928	0.924
Crip2	5.8	-0.0105	0.893	0.079	0.00245	0.00852	0.0924	0.0781	0.92	0.928	0.924
Gabarap	6.71	-0.0236	0.52	0.0516	0.0037	0.00904	0.0953	0.0782	0.92	0.928	0.924
Zfp52	2.41	0.034	0.817	-0.18	-0.00112	0.00819	0.0685	0.0782	0.92	0.928	0.924
Nebl	6.86	0.0407	0.189	-0.0573	-0.00375	0.00906	0.0666	0.0783	0.92	0.928	0.924
Tatdn3	3.6	0.135	0.011	-0.125	-0.00168	0.0083	0.0513	0.0784	0.92	0.928	0.924
Efhc2	0.4	0.0607	0.856	0.386	0.000512	0.00812	0.0799	0.0784	0.92	0.928	0.924
Csrnp1	3.49	0.594	8.42e-13	0.18	0.0011	0.00818	0.0829	0.0784	0.92	0.928	0.924
Ralgapa1	7.61	-0.0155	0.726	0.0528	0.00364	0.009	0.0987	0.0784	0.92	0.928	0.924
Scg5	7.04	-0.0105	0.811	0.0494	0.0039	0.00914	0.097	0.0785	0.92	0.928	0.924
Ptpn13	4.39	0.0228	0.782	-0.106	-0.00199	0.00838	0.0648	0.0786	0.92	0.928	0.924
Ccdc85c	5.96	-0.0345	0.493	0.0703	0.00272	0.00861	0.0987	0.0787	0.92	0.928	0.924
Ybey	2.88	0.0329	0.793	-0.164	-0.00129	0.00822	0.0557	0.0787	0.92	0.928	0.924
Incenp	3.74	-0.0944	0.168	0.124	0.00159	0.00828	0.0779	0.0787	0.92	0.928	0.924
Gpr107	6	0.00128	0.986	-0.0653	-0.00341	0.0089	0.0496	0.0791	0.92	0.928	0.924
Slc16a4	2.04	-0.0353	0.836	-0.199	-0.000983	0.00817	0.0805	0.0792	0.92	0.928	0.924
Tubb3	8.08	-0.0235	0.6	0.0592	0.00325	0.00883	0.0971	0.0792	0.92	0.928	0.924
Heg1	4.91	0.103	0.186	-0.139	-0.00146	0.00825	0.0775	0.0794	0.92	0.928	0.924
Dcst1	0.474	-0.0551	0.855	0.334	0.000569	0.00812	0.082	0.0794	0.92	0.928	0.924
Sec61g	4.3	0.0258	0.804	-0.129	-0.00167	0.00829	0.0762	0.0796	0.92	0.928	0.924
Pcdha4	3.9	0.0764	0.61	-0.208	-0.000972	0.00817	0.0772	0.0796	0.92	0.928	0.924
Smurf2	5.16	-0.0182	0.774	-0.0812	-0.00254	0.00855	0.0664	0.0797	0.92	0.928	0.924
Spats1	0.678	0.0188	0.952	0.329	0.000604	0.00812	0.0527	0.0797	0.92	0.928	0.924
Fam111a	0.967	-0.339	0.0279	0.321	0.000638	0.00813	0.0677	0.0797	0.92	0.928	0.924
Zfp952	3.78	-0.0143	0.959	-0.241	-0.000821	0.00815	0.0851	0.0799	0.92	0.928	0.924
Taf9	3.74	0.143	0.203	-0.202	-0.000994	0.00817	0.0765	0.0802	0.92	0.928	0.924
Phf1	5.37	0.0293	0.503	-0.0705	-0.00303	0.00873	0.0586	0.0802	0.92	0.928	0.924
Zfp945	3.23	-0.0899	0.476	0.188	0.00104	0.00818	0.0857	0.0804	0.92	0.928	0.924
Pcdhb11	2.48	-0.0616	0.697	0.201	0.000975	0.00817	0.0821	0.0806	0.92	0.928	0.924
Tgfbi	1.74	0.07	0.744	-0.272	-0.000718	0.00814	0.0823	0.0806	0.92	0.928	0.924
Det1	2.53	-0.109	0.202	0.159	0.0012	0.0082	0.0654	0.0808	0.92	0.928	0.924
Pisd	5.76	0.154	0.586	-0.402	-0.000475	0.00811	0.0772	0.0809	0.92	0.928	0.924
Fut9	6.34	-0.0971	0.247	0.141	0.00139	0.00823	0.0858	0.0809	0.92	0.928	0.924
AC102077.1	1.22	-0.0514	0.847	-0.309	-0.000627	0.00813	0.0754	0.0809	0.92	0.928	0.924
Mthfd1l	4.04	0.0956	0.298	-0.157	-0.00128	0.00821	0.0771	0.0809	0.92	0.928	0.924
Ikbkb	5.3	0.00631	0.963	0.116	0.00165	0.00829	0.0927	0.081	0.92	0.928	0.924
Ankrd63	4.65	-0.0543	0.486	-0.117	-0.00174	0.00831	0.0751	0.0811	0.92	0.928	0.924
Wapl	5.85	-0.027	0.657	0.0758	0.00251	0.00853	0.0966	0.0811	0.92	0.928	0.924
Thrsp	4.59	0.0818	0.195	0.108	0.00178	0.00832	0.0895	0.0811	0.92	0.928	0.924
Osbpl6	7	0.0146	0.791	-0.069	-0.00305	0.00873	0.0669	0.0811	0.92	0.928	0.924
Slc25a32	4.36	-0.0916	0.138	-0.116	-0.00174	0.00831	0.0734	0.0812	0.92	0.928	0.924
Cir1	5.19	-0.0577	0.302	0.092	0.00209	0.0084	0.0864	0.0813	0.92	0.928	0.924
Fam13a	4.63	-0.0217	0.771	0.0901	0.00215	0.00842	0.0838	0.0814	0.92	0.928	0.924
Gsr	4.38	0.0107	0.93	-0.122	-0.00168	0.0083	0.0686	0.0816	0.92	0.928	0.924
Mical1	3.15	-0.0459	0.719	0.157	0.00121	0.0082	0.0933	0.0816	0.92	0.928	0.924
Poc5	5.44	0.0146	0.836	-0.086	-0.00241	0.0085	0.0684	0.0822	0.92	0.928	0.924
Catsper2	1.04	0.173	0.484	-0.366	-0.000533	0.00812	0.0795	0.0823	0.92	0.928	0.924
Cxxc4	4.84	-0.0436	0.578	0.105	0.00179	0.00832	0.0948	0.0823	0.92	0.928	0.924
Tpp1	5.53	0.0542	0.423	0.102	0.00187	0.00834	0.0914	0.0823	0.92	0.928	0.924
Aga	1.98	0.0402	0.846	-0.238	-0.000806	0.00814	0.0791	0.0824	0.92	0.928	0.924
Cep290	3.65	-0.0598	0.616	0.163	0.00118	0.0082	0.0816	0.0824	0.92	0.928	0.924
Klf6	5.06	-0.02	0.832	0.105	0.00181	0.00832	0.0918	0.0825	0.92	0.928	0.924
Mycbp	2.24	0.124	0.313	-0.209	-0.000928	0.00816	0.0738	0.0826	0.92	0.928	0.924
Smagp	0.0115	0.25	0.291	-0.425	-0.000455	0.00811	0.0709	0.0827	0.92	0.928	0.924
Lime1	4.98	-0.131	0.0647	-0.139	-0.00144	0.00824	0.0771	0.0828	0.92	0.928	0.924
Hscb	1.63	-0.149	0.374	0.279	0.000712	0.00813	0.0722	0.0828	0.92	0.928	0.924
Pak2	5.84	0.0279	0.368	-0.0576	-0.0037	0.00902	0.0434	0.0828	0.92	0.928	0.924
Rora	5.4	-0.0268	0.813	0.129	0.00149	0.00825	0.0897	0.0829	0.92	0.928	0.924
Dopey2	6.87	0.0496	0.219	-0.0723	-0.00288	0.00867	0.073	0.0829	0.92	0.928	0.924
Sox1	3.98	-0.00264	0.989	0.134	0.00142	0.00824	0.0936	0.0829	0.92	0.928	0.924
Myh7	3.5	-0.0211	0.9	0.165	0.00115	0.00819	0.0933	0.083	0.92	0.928	0.924
Ttc37	4.76	0.0039	0.975	-0.11	-0.00182	0.00833	0.08	0.0832	0.92	0.928	0.924
Nipa1	5.88	-0.0284	0.427	0.0532	0.0035	0.00893	0.0934	0.0832	0.92	0.928	0.924
Rnf223	0.746	0.04	0.91	-0.367	-0.000527	0.00812	0.0792	0.0832	0.92	0.928	0.924
Ctsf	5.79	-0.0137	0.79	0.0583	0.0032	0.00879	0.0998	0.0833	0.92	0.928	0.924
Taf8	4.2	-0.0332	0.705	-0.118	-0.00168	0.00829	0.0703	0.0834	0.92	0.928	0.924
Mto1	4.3	-0.0706	0.173	0.0926	0.00204	0.00839	0.0819	0.0834	0.92	0.928	0.924
Wdr12	5.49	-0.00749	0.918	0.0726	0.00261	0.00857	0.0854	0.0835	0.92	0.928	0.924
Fam151b	1.42	-0.152	0.438	0.304	0.000623	0.00813	0.0871	0.0835	0.92	0.928	0.924
Zfp146	5.18	-0.0679	0.177	-0.0925	-0.00217	0.00842	0.0739	0.0836	0.92	0.928	0.924
Elk3	2.94	0.123	0.238	-0.182	-0.0011	0.00818	0.0752	0.0836	0.92	0.928	0.924
Tll1	2.32	-0.134	0.234	0.197	0.000981	0.00817	0.0771	0.0838	0.92	0.928	0.924
Cdc42ep3	2.41	0.0612	0.692	0.203	0.000937	0.00816	0.0817	0.0839	0.92	0.928	0.924
Btbd3	7.79	-0.0321	0.49	0.0651	0.00286	0.00866	0.0985	0.0841	0.92	0.928	0.924
Abcc6	1.24	0.165	0.334	-0.292	-0.000683	0.00813	0.0626	0.0845	0.92	0.928	0.924
Prkcq	2.67	0.129	0.554	-0.312	-0.000615	0.00813	0.0893	0.0845	0.92	0.928	0.924
Ret	2.32	-0.0851	0.588	0.208	0.000894	0.00815	0.0986	0.0845	0.92	0.928	0.924
Erich5	0.959	-0.216	0.27	0.349	0.000585	0.00812	0.0613	0.0846	0.92	0.928	0.924
Murc	0.318	0.155	0.436	0.342	0.000566	0.00812	0.0498	0.0846	0.92	0.928	0.924
Ctu1	3.04	-0.0976	0.276	-0.153	-0.00129	0.00821	0.0747	0.0846	0.92	0.928	0.924
Sorcs3	5.84	-0.0494	0.202	0.0647	0.00285	0.00865	0.0984	0.0847	0.92	0.928	0.924
Mettl7a1	5.13	-0.0994	0.12	-0.121	-0.00164	0.00828	0.0733	0.0847	0.92	0.928	0.924
Sncg	1.26	-0.0126	0.969	-0.302	-0.000663	0.00813	0.0631	0.0847	0.92	0.928	0.924
Sdhd	6.09	-0.0249	0.625	0.0665	0.00281	0.00864	0.0981	0.0848	0.92	0.928	0.924
Kif22	0.937	0.0537	0.874	-0.37	-0.000509	0.00812	0.083	0.0849	0.92	0.928	0.924
Ephb2	5.22	0.0709	0.298	-0.116	-0.00173	0.00831	0.0731	0.0849	0.92	0.928	0.924
Spsb4	1.52	0.0318	0.908	-0.273	-0.000708	0.00813	0.0841	0.0852	0.92	0.928	0.924
S100a6	2.46	0.0997	0.334	-0.168	-0.00107	0.00818	0.0868	0.0853	0.92	0.928	0.924
Phip	5.94	-0.014	0.861	0.0834	0.00221	0.00843	0.097	0.0853	0.92	0.928	0.924
Xrcc1	4.76	-0.0298	0.689	0.092	0.00206	0.00839	0.0944	0.0853	0.92	0.928	0.924
Hsd17b11	5.02	-0.0284	0.683	0.0869	0.00212	0.00841	0.0984	0.0853	0.92	0.928	0.924
Ndufb5	6.14	-0.0369	0.193	0.0488	0.00377	0.00905	0.0914	0.0854	0.92	0.928	0.924
RP23-79E13.7	3.53	-0.00475	0.976	-0.139	-0.00141	0.00824	0.0743	0.0854	0.92	0.928	0.924
Pam16	3.56	-0.154	0.371	0.277	0.000723	0.00814	0.0766	0.0855	0.92	0.928	0.924
Strn	6.6	0.0337	0.317	-0.056	-0.00361	0.00897	0.0785	0.0855	0.92	0.928	0.924
Pop5	3.5	0.074	0.642	-0.206	-0.000928	0.00816	0.0891	0.0856	0.92	0.928	0.924
Zfp619	2.65	0.0656	0.539	0.158	0.0012	0.0082	0.075	0.0856	0.92	0.928	0.924
Pla2g16	4.8	0.0297	0.662	-0.0975	-0.0021	0.0084	0.0627	0.0856	0.92	0.928	0.924
Tex30	1.4	0.000916	0.997	-0.259	-0.000725	0.00814	0.0709	0.0857	0.92	0.928	0.924
Amt	4.66	-0.000856	0.995	-0.136	-0.00143	0.00824	0.0828	0.0857	0.92	0.928	0.924
Haghl	5.45	0.092	0.156	0.112	0.00168	0.00829	0.0978	0.0857	0.92	0.928	0.924
Gp5	0.384	0.14	0.554	-0.354	-0.000537	0.00812	0.0665	0.0858	0.92	0.928	0.924
Serhl	1.75	-0.164	0.377	0.28	0.000653	0.00813	0.0994	0.0858	0.92	0.928	0.924
Mis12	4.45	-0.103	0.135	-0.128	-0.00152	0.00826	0.0791	0.0859	0.92	0.928	0.924
Lamtor5	4.78	-0.0652	0.194	0.0866	0.0021	0.0084	0.0932	0.0859	0.92	0.928	0.924
Mms19	2.45	0.0338	0.975	-0.976	-0.00016	0.0081	0.0814	0.086	0.92	0.928	0.924
Gng10	4.28	0.217	0.19	-0.296	-0.000642	0.00813	0.083	0.086	0.92	0.928	0.924
Ankrd53	1.07	-0.163	0.39	-0.296	-0.000639	0.00813	0.0828	0.0864	0.92	0.928	0.924
Nans	3.39	0.00865	0.953	-0.135	-0.00145	0.00824	0.0706	0.0865	0.92	0.928	0.924
RP23-43G12.1	4.69	-0.0247	0.712	-0.0928	-0.00215	0.00842	0.0626	0.0865	0.92	0.928	0.924
Dctd	2.13	0.0115	0.978	-0.366	-0.000519	0.00812	0.0854	0.0865	0.92	0.928	0.924
Filip1	2.27	-0.224	0.561	0.574	0.000336	0.00811	0.0687	0.0866	0.92	0.928	0.924
Nuak2	0.775	0.218	0.198	-0.294	-0.000617	0.00813	0.0851	0.0866	0.92	0.928	0.924
Cep72	-0.161	-0.287	0.32	0.508	0.000367	0.00811	0.073	0.087	0.92	0.928	0.924
Map6d1	5.78	-0.0487	0.458	-0.104	-0.00191	0.00835	0.0735	0.0872	0.92	0.928	0.924
Zscan25	3.49	0.0493	0.704	0.16	0.00116	0.00819	0.0935	0.0875	0.92	0.928	0.924
Rnf34	5.95	-0.0433	0.179	0.0553	0.00333	0.00884	0.0951	0.0875	0.92	0.928	0.924
Ryr3	7.48	0.0156	0.823	-0.0816	-0.00244	0.0085	0.0774	0.0875	0.92	0.928	0.924
Tex15	0.586	0.106	0.675	0.339	0.000551	0.00812	0.0711	0.0875	0.92	0.928	0.924
Scly	3.74	-0.00568	0.97	0.122	0.00151	0.00826	0.0971	0.0876	0.92	0.928	0.924
Arih2	5.39	0.0397	0.461	0.0784	0.00232	0.00847	0.0993	0.0876	0.92	0.928	0.924
Tead1	5.89	0.0308	0.706	-0.105	-0.00186	0.00834	0.0763	0.0876	0.92	0.928	0.924
Ipmk	5.77	0.00439	0.954	-0.07	-0.00284	0.00864	0.0714	0.0877	0.92	0.928	0.924
Col8a2	1.73	0.491	0.142	-0.586	-0.000322	0.00811	0.0945	0.0878	0.92	0.928	0.924
Arfrp1	3.3	-0.00157	0.997	0.338	0.000589	0.00812	0.0796	0.0878	0.92	0.928	0.924
Pura	4.38	-0.129	0.27	0.189	0.000997	0.00817	0.0912	0.088	0.92	0.928	0.924
Chrnb2	5.24	0.126	0.647	-0.359	-0.000478	0.00811	0.088	0.088	0.92	0.928	0.924
AC124566.2	4.38	0.0801	0.193	-0.114	-0.00175	0.00831	0.0682	0.0881	0.92	0.928	0.924
Tax1bp3	2.65	0.0351	0.837	-0.204	-0.000938	0.00816	0.0785	0.0882	0.92	0.928	0.924
Zfp1	4.14	-0.0374	0.718	0.127	0.00146	0.00825	0.0941	0.0882	0.92	0.928	0.924
Zfyve21	3.43	0.0412	0.752	-0.159	-0.00119	0.0082	0.0842	0.0882	0.92	0.928	0.924
Arpc1b	3.47	0.114	0.387	-0.206	-0.000919	0.00816	0.0835	0.0886	0.92	0.928	0.924
Adat2	2.64	0.104	0.38	-0.185	-0.00101	0.00817	0.087	0.0888	0.92	0.928	0.924
Lrp2	2.3	-0.0528	0.801	-0.239	-0.000777	0.00814	0.0894	0.0889	0.92	0.928	0.924
Khdrbs2	3.32	0.0405	0.722	0.135	0.00133	0.00822	0.098	0.089	0.92	0.928	0.924
Bace1	6.89	0.0137	0.818	-0.0702	-0.00286	0.00865	0.0755	0.0891	0.92	0.928	0.924
Ak6	5.63	-0.0321	0.588	0.0792	0.00228	0.00845	0.0988	0.0893	0.92	0.928	0.924
Kdm3b	5.97	-0.0649	0.391	-0.12	-0.00163	0.00828	0.0801	0.0893	0.92	0.928	0.924
Adcy8	4.67	-0.127	0.226	0.179	0.00104	0.00817	0.097	0.0893	0.92	0.928	0.924
Rsph10b	2.57	0.0188	0.908	0.169	0.00105	0.00817	0.0876	0.0895	0.92	0.928	0.924
Ino80c	4.25	0.0724	0.142	0.0877	0.00201	0.00837	0.0914	0.0896	0.92	0.928	0.924
Tox2	5.07	-0.0259	0.781	0.104	0.00174	0.00831	0.0997	0.0896	0.92	0.928	0.924
Cdc26	3.45	-0.104	0.17	0.132	0.00137	0.00823	0.0947	0.0897	0.92	0.928	0.924
Fam169b	-0.155	-0.0537	0.91	0.481	0.000374	0.00811	0.0903	0.0897	0.92	0.928	0.924
Mvd	3.86	-0.0267	0.825	-0.136	-0.00137	0.00823	0.09	0.0898	0.92	0.928	0.924
Rnf152	2.99	-0.00243	0.993	-0.218	-0.00086	0.00815	0.0871	0.0899	0.92	0.928	0.924
Dusp14	4.52	0.0435	0.479	0.0879	0.00203	0.00838	0.0993	0.09	0.92	0.928	0.924
Cbfa2t2	6.18	0.0406	0.111	0.046	0.00396	0.00912	0.09	0.09	0.92	0.928	0.924
Git2	5.25	0.0155	0.755	-0.0655	-0.00301	0.00871	0.0604	0.0903	0.92	0.928	0.924
Flnb	7.44	0.0627	0.126	-0.0749	-0.00263	0.00856	0.0813	0.0904	0.92	0.928	0.924
Slc25a45	1.69	-0.00459	0.988	-0.245	-0.000782	0.00814	0.065	0.0905	0.92	0.928	0.924
Ubac1	4.86	-0.0543	0.422	0.101	0.00179	0.00832	0.0968	0.0905	0.92	0.928	0.924
Arhgap42	3.56	-0.0311	0.775	0.129	0.00142	0.00824	0.0906	0.0907	0.92	0.928	0.924
Rhbdl3	5.14	0.0413	0.657	-0.123	-0.00156	0.00826	0.0802	0.0908	0.92	0.928	0.924
Wrn	4.02	0.0365	0.694	-0.125	-0.00159	0.00827	0.0715	0.0909	0.92	0.928	0.924
Cilp2	1.05	0.227	0.204	-0.289	-0.000618	0.00813	0.0978	0.0909	0.92	0.928	0.924
Slfn9	1.39	0.115	0.571	-0.282	-0.000683	0.00813	0.0895	0.091	0.92	0.928	0.924
Itga9	2.66	0.0937	0.38	-0.172	-0.00109	0.00818	0.0767	0.091	0.92	0.928	0.924
RP23-438P19.2	3.12	0.074	0.47	-0.161	-0.00119	0.0082	0.0721	0.0911	0.92	0.928	0.924
Mapk7	4.31	-0.0853	0.439	-0.168	-0.00112	0.00819	0.0874	0.0911	0.92	0.928	0.924
Arv1	2.57	0.00925	0.963	-0.182	-0.00103	0.00817	0.0762	0.0912	0.92	0.928	0.924
Azin2	4.61	-0.0789	0.202	0.104	0.00175	0.00831	0.0971	0.0912	0.92	0.928	0.924
Parp3	1.72	0.142	0.314	-0.243	-0.000772	0.00814	0.0718	0.0912	0.92	0.928	0.924
Prkd3	4.47	0.025	0.718	-0.0918	-0.00206	0.00839	0.0717	0.0913	0.92	0.928	0.924
Car12	5.64	0.103	0.155	-0.131	-0.00148	0.00825	0.0797	0.0914	0.92	0.928	0.924
Sbds	5.68	-0.00291	0.967	0.058	0.00309	0.00873	0.0972	0.0916	0.92	0.928	0.924
Triobp	3.1	0.0587	0.609	-0.156	-0.00124	0.0082	0.0881	0.0917	0.92	0.928	0.924
Cep97	4.98	-0.0909	0.0825	-0.0977	-0.00193	0.00835	0.0843	0.0919	0.92	0.928	0.924
Trmu	2.54	-0.0828	0.71	0.274	0.000671	0.00813	0.0943	0.0919	0.92	0.928	0.924
Ankrd44	2.88	0.109	0.553	-0.254	-0.000714	0.00813	0.0962	0.0919	0.92	0.928	0.924
Zbtb39	4.05	0.0144	0.893	-0.118	-0.00165	0.00828	0.0673	0.0919	0.92	0.928	0.924
Cirbp	5.27	0.164	0.141	0.193	0.000966	0.00816	0.0971	0.092	0.92	0.928	0.924
Zbtb37	5.11	-0.0862	0.308	-0.136	-0.00137	0.00823	0.0908	0.0923	0.92	0.928	0.924
Nab2	5.32	-0.0962	0.177	-0.124	-0.00152	0.00826	0.0847	0.0924	0.92	0.928	0.924
Wnt9a	2.1	-0.268	0.0286	0.233	0.000767	0.00814	0.0998	0.0925	0.92	0.928	0.924
Cml3	2.11	0.0212	0.939	-0.255	-0.000707	0.00813	0.0986	0.0926	0.92	0.928	0.924
Supt4a	4.35	-0.0121	0.905	-0.104	-0.00177	0.00831	0.0897	0.0926	0.92	0.928	0.924
Arsg	4.01	0.152	0.026	-0.139	-0.00133	0.00822	0.085	0.0927	0.92	0.928	0.924
Wdr91	4.73	-0.0166	0.826	0.0724	0.00248	0.00851	0.0727	0.0927	0.92	0.928	0.924
Wrap73	4.1	-0.0291	0.71	0.099	0.0018	0.00832	0.0872	0.0928	0.92	0.928	0.924
Igdcc3	1.63	0.112	0.489	-0.243	-0.000763	0.00814	0.0794	0.0928	0.92	0.928	0.924
Mettl3	4.34	-0.0609	0.444	-0.119	-0.00153	0.00826	0.092	0.093	0.92	0.928	0.924
N4bp1	6.27	-0.0639	0.0434	-0.0635	-0.00301	0.0087	0.0764	0.0931	0.92	0.928	0.924
Arvcf	5.15	-0.0149	0.876	-0.1	-0.00189	0.00834	0.0828	0.0932	0.92	0.928	0.924
Itpkc	3.19	0.0211	0.89	-0.156	-0.00117	0.00819	0.0903	0.0932	0.92	0.928	0.924
Scrt2	4.38	0.0458	0.627	-0.122	-0.00154	0.00826	0.0908	0.0933	0.92	0.928	0.924
Cln8	4.85	-0.0298	0.649	-0.0892	-0.00214	0.00841	0.0771	0.0933	0.92	0.928	0.924
Dap3	5.98	-0.00543	0.935	0.0598	0.00319	0.0088	0.0999	0.0772	0.921	0.928	0.924
Six4	1.47	-0.108	0.597	-0.269	-0.00066	0.00813	0.1	0.0909	0.921	0.928	0.924
Rgs5	6.69	0.0725	0.0211	-0.0635	-0.00304	0.00871	0.0806	0.0936	0.92	0.929	0.925
Bbof1	3.59	-0.0212	0.848	-0.126	-0.00144	0.00824	0.0848	0.0936	0.92	0.929	0.925
Sdc3	8.01	-0.0167	0.727	0.0563	0.00348	0.00893	0.102	0.0766	0.922	0.928	0.925
Ppfia1	5.56	-0.0594	0.334	0.0937	0.00198	0.00837	0.102	0.0847	0.922	0.928	0.925
Sec63	6.5	-0.00317	0.954	0.0464	0.00394	0.00913	0.102	0.0849	0.922	0.928	0.925
Scube1	5.01	-0.0257	0.849	0.141	0.00129	0.00821	0.102	0.0849	0.922	0.928	0.925
Ddrgk1	5.22	-0.0614	0.439	0.114	0.00162	0.00828	0.102	0.0851	0.922	0.928	0.925
Rsbn1l	5.24	-0.0332	0.6	0.0818	0.00225	0.00844	0.101	0.0856	0.922	0.928	0.925
Tmem132a	7.4	-0.0287	0.6	0.0711	0.0026	0.00856	0.101	0.0866	0.922	0.928	0.925
B4galt2	5.57	-0.027	0.75	0.0973	0.00189	0.00834	0.102	0.0874	0.922	0.928	0.925
Zc3h6	4.29	-0.111	0.104	0.12	0.0015	0.00825	0.102	0.0901	0.922	0.928	0.925
Lcor	3.39	-0.104	0.409	0.181	0.000997	0.00817	0.102	0.0916	0.922	0.928	0.925
Tpi1	9.19	-0.0301	0.183	0.0375	0.00527	0.00992	0.103	0.0768	0.923	0.928	0.925
Dnajb6	7.1	-0.0198	0.637	0.0527	0.00345	0.0089	0.103	0.0865	0.923	0.928	0.925
Zranb1	6.05	0.0417	0.262	0.0594	0.00298	0.0087	0.103	0.0897	0.923	0.928	0.925
Usp49	5.12	0.0349	0.533	-0.0828	-0.0023	0.00845	0.0783	0.0939	0.92	0.93	0.925
Kif14	0.059	-0.143	0.631	0.406	0.000438	0.00811	0.0767	0.0944	0.92	0.93	0.925
Wdr36	5.04	-0.0469	0.293	0.0722	0.00247	0.00851	0.0921	0.0944	0.92	0.93	0.925
Blvra	3.49	-0.0428	0.595	0.116	0.00152	0.00826	0.0771	0.0945	0.92	0.93	0.925
Zdhhc6	4.58	-0.0115	0.893	-0.0911	-0.00208	0.00839	0.079	0.0945	0.92	0.93	0.925
Mgat4a	5.84	0.0506	0.114	-0.0616	-0.00313	0.00875	0.0703	0.0946	0.92	0.93	0.925
Mob3a	3.26	-0.0101	0.947	-0.147	-0.0013	0.00821	0.0702	0.0947	0.92	0.93	0.925
Slc41a1	6.59	0.0481	0.221	-0.0691	-0.00279	0.00861	0.079	0.0948	0.92	0.93	0.925
Arid3b	2.63	0.139	0.193	-0.181	-0.000984	0.00816	0.0933	0.0953	0.92	0.93	0.925
Cdkn2aip	3.93	-0.0446	0.675	-0.138	-0.00132	0.00822	0.0869	0.0955	0.92	0.93	0.925
RP23-314N18.4	0.25	-0.102	0.71	0.374	0.000471	0.00811	0.0753	0.0956	0.92	0.93	0.925
Nab1	4.83	-0.00507	0.955	-0.0828	-0.00227	0.00844	0.0735	0.0957	0.92	0.93	0.925
Prmt5	5.99	0.0277	0.39	-0.0542	-0.00357	0.00893	0.0653	0.0958	0.92	0.93	0.925
Mbnl1	6.23	0.0315	0.42	-0.0605	-0.00319	0.00877	0.0807	0.0959	0.92	0.93	0.925
Ubap1l	1.85	0.166	0.214	-0.232	-0.000791	0.00814	0.083	0.096	0.92	0.93	0.925
Fanci	1.46	-0.249	0.369	0.422	0.000426	0.00811	0.0933	0.096	0.92	0.93	0.925
Pcdhb21	1.73	-0.000773	0.998	0.246	0.000738	0.00814	0.097	0.0961	0.92	0.93	0.925
Tmem88	0.613	0.142	0.519	-0.32	-0.000556	0.00812	0.0848	0.0962	0.92	0.93	0.925
Atg4c	5.43	0.0348	0.399	-0.0703	-0.00278	0.00861	0.0607	0.0963	0.92	0.93	0.925
Trim13	2.95	-0.00571	0.974	-0.153	-0.00119	0.00819	0.083	0.0964	0.92	0.93	0.925
Dck	4.49	0.0258	0.681	-0.0867	-0.00218	0.00842	0.0671	0.0966	0.92	0.93	0.925
Recql4	2.25	0.312	0.044	-0.285	-0.000618	0.00812	0.099	0.0967	0.92	0.93	0.925
Pla2g4a	1.47	0.0364	0.891	-0.277	-0.000643	0.00813	0.0974	0.0968	0.92	0.93	0.925
Zfp691	2.32	-0.0818	0.517	-0.184	-0.000988	0.00817	0.085	0.0968	0.92	0.93	0.925
Asap3	2.31	0.0843	0.505	-0.191	-0.000937	0.00816	0.0771	0.0969	0.92	0.93	0.925
Naa10	4.22	-0.0281	0.777	0.115	0.00151	0.00825	0.0976	0.0972	0.92	0.93	0.925
Kcnmb2	2.32	-0.0229	0.908	0.153	0.00109	0.00818	0.0878	0.0972	0.92	0.93	0.925
Efcab12	1.99	-0.1	0.762	-0.401	-0.000465	0.00811	0.0874	0.0974	0.92	0.93	0.925
Ppp1r14a	2.64	0.0703	0.614	-0.184	-0.000998	0.00817	0.0891	0.0976	0.92	0.93	0.925
Lman2	6.57	0.0298	0.431	-0.0602	-0.00319	0.00877	0.0734	0.0976	0.92	0.93	0.925
Rqcd1	4.98	-0.0622	0.191	-0.0862	-0.00215	0.00841	0.0772	0.0981	0.92	0.93	0.925
Sdhaf1	3.3	-0.0405	0.626	0.118	0.00151	0.00825	0.0718	0.0981	0.92	0.93	0.925
Anapc1	6.86	0.0551	0.0173	-0.0466	-0.00413	0.00917	0.0869	0.0981	0.92	0.93	0.925
Trmt10a	2.65	-0.0469	0.727	0.163	0.00106	0.00818	0.0925	0.0982	0.92	0.93	0.925
Lifr	6.3	0.0274	0.508	-0.0602	-0.00314	0.00874	0.0839	0.0982	0.92	0.93	0.925
Adap2	2.36	-0.0188	0.913	0.171	0.00101	0.00817	0.0879	0.0983	0.92	0.93	0.925
Papd7	5.86	-0.0655	0.0616	-0.0684	-0.00272	0.00859	0.0782	0.0984	0.92	0.93	0.925
Ttll5	5.08	0.0812	0.36	-0.135	-0.00133	0.00822	0.0981	0.0985	0.92	0.93	0.925
Lyrm7	3.06	0.0799	0.495	-0.168	-0.00107	0.00818	0.0912	0.0985	0.92	0.93	0.925
Dnali1	1.14	0.0908	0.732	-0.318	-0.000552	0.00812	0.0953	0.0987	0.92	0.93	0.925
Saal1	3.09	0.0301	0.81	-0.151	-0.00124	0.0082	0.0749	0.0988	0.92	0.93	0.925
Zfp618	3.18	0.0099	0.947	-0.146	-0.00131	0.00821	0.0603	0.0989	0.92	0.93	0.925
Rasgrp3	3.99	0.0321	0.775	-0.134	-0.00134	0.00822	0.0899	0.0989	0.92	0.93	0.925
Trim30a	0.935	-0.0353	0.896	-0.277	-0.000628	0.00813	0.0866	0.099	0.92	0.93	0.925
RP23-79E13.6	2.79	-0.0514	0.688	-0.163	-0.00108	0.00818	0.0923	0.0991	0.92	0.93	0.925
Pou3f2	3.41	-0.0543	0.572	-0.134	-0.00136	0.00822	0.0812	0.0992	0.92	0.93	0.925
Tjp2	5.1	0.0247	0.731	-0.0867	-0.00208	0.00838	0.0944	0.0997	0.92	0.931	0.926
Prmt3	4.49	-0.0142	0.853	0.0834	0.00206	0.00838	0.0943	0.0998	0.92	0.931	0.926
Evi2a	3.88	0.0312	0.773	-0.13	-0.00138	0.00823	0.0873	0.0999	0.92	0.931	0.926
Rnf19a	5.74	0.00536	0.953	-0.0807	-0.00228	0.00844	0.0814	0.0999	0.92	0.931	0.926
Narf	5.9	-0.0617	0.144	-0.0763	-0.0024	0.00848	0.0841	0.1	0.92	0.931	0.926
AC165086.3	5.92	0.028	0.55	-0.0692	-0.00271	0.00858	0.0767	0.1	0.92	0.931	0.926
Stard13	4.74	0.0469	0.386	-0.0852	-0.00211	0.00839	0.0825	0.1	0.92	0.931	0.926
Ctsc	3.43	0.0611	0.533	-0.145	-0.00125	0.0082	0.0812	0.101	0.92	0.931	0.926
Map4k5	5.5	0.18	0.208	-0.24	-0.000713	0.00813	0.0859	0.101	0.92	0.931	0.926
Itgb4	3.2	0.106	0.273	-0.163	-0.00112	0.00818	0.086	0.101	0.92	0.931	0.926
Dhx57	5.93	-0.00904	0.85	-0.0567	-0.0033	0.0088	0.0691	0.101	0.92	0.931	0.926
Slc27a3	3.05	0.117	0.368	-0.192	-0.000905	0.00815	0.0986	0.101	0.92	0.931	0.926
Abcc3	1.23	-0.0492	0.848	0.282	0.000611	0.00812	0.0965	0.101	0.92	0.931	0.926
Ndufaf2	3.31	-0.109	0.114	0.123	0.00139	0.00823	0.0908	0.101	0.92	0.931	0.926
Gigyf1	6.56	-0.0312	0.445	-0.0623	-0.00301	0.00869	0.0819	0.101	0.92	0.931	0.926
Serpinh1	4.16	-0.059	0.632	-0.158	-0.00112	0.00818	0.095	0.101	0.92	0.931	0.926
Ncbp2	5.66	-0.0273	0.48	-0.0609	-0.00297	0.00867	0.0698	0.101	0.92	0.931	0.926
Xpnpep3	4.54	0.00669	0.947	-0.0873	-0.00196	0.00835	0.0987	0.101	0.92	0.931	0.926
Pan2	4.11	0.00681	0.974	-0.169	-0.00107	0.00818	0.0939	0.102	0.92	0.931	0.926
Prdm1	-0.158	0.539	0.00189	-0.376	-0.000437	0.00811	0.0741	0.102	0.92	0.931	0.926
Polh	2.34	-0.0595	0.658	-0.174	-0.000994	0.00817	0.0931	0.102	0.92	0.931	0.926
Etfb	4.61	-0.0382	0.448	-0.0834	-0.00217	0.00841	0.0627	0.102	0.92	0.931	0.926
Tmem135	5.86	0.0348	0.393	-0.0642	-0.00287	0.00863	0.0825	0.102	0.92	0.931	0.926
Zc3h12c	4.07	0.0338	0.758	-0.126	-0.00139	0.00823	0.0964	0.102	0.92	0.931	0.926
Pank3	6.21	-0.122	5.24e-06	-0.059	-0.00302	0.00869	0.0927	0.102	0.92	0.931	0.926
Foxn3	5.49	0.0284	0.629	-0.0788	-0.00236	0.00846	0.0859	0.103	0.92	0.931	0.926
Nup98	5.7	-0.0146	0.801	-0.0661	-0.00265	0.00856	0.0933	0.103	0.92	0.931	0.926
Rpap2	4.07	-0.0344	0.656	0.0997	0.00172	0.00829	0.0934	0.103	0.92	0.931	0.926
Pdlim5	5.12	0.0663	0.1	-0.077	-0.00238	0.00847	0.0747	0.103	0.92	0.931	0.926
Fam20a	3.52	0.135	0.12	-0.153	-0.00115	0.00819	0.0952	0.103	0.92	0.931	0.926
Ptprb	5.84	0.045	0.49	-0.0937	-0.00192	0.00834	0.0912	0.103	0.92	0.931	0.926
Sod3	3.39	0.127	0.176	-0.157	-0.00111	0.00818	0.097	0.103	0.92	0.931	0.926
Map2k7	6.55	0.0173	0.688	-0.0559	-0.00331	0.0088	0.0829	0.103	0.92	0.931	0.926
Ccl9	0.738	0.209	0.318	-0.338	-0.0005	0.00812	0.0922	0.104	0.92	0.931	0.926
Efs	3.52	0.0149	0.937	-0.169	-0.00104	0.00817	0.0941	0.104	0.92	0.931	0.926
Gucd1	3.84	-0.0777	0.146	-0.104	-0.0017	0.00829	0.0652	0.104	0.92	0.931	0.926
Slc39a8	1.77	0.0367	0.834	-0.205	-0.000863	0.00815	0.0643	0.104	0.92	0.931	0.926
Cfap74	3.86	0.115	0.166	-0.141	-0.00124	0.0082	0.0988	0.104	0.92	0.931	0.926
Iars	6.37	0.0135	0.747	-0.0517	-0.00352	0.00888	0.0817	0.104	0.92	0.931	0.926
Rap1b	5.77	0.00594	0.946	-0.0548	-0.00346	0.00886	0.0564	0.104	0.92	0.931	0.926
Rab3d	4.36	-0.0818	0.175	-0.102	-0.00167	0.00828	0.0991	0.105	0.92	0.931	0.926
Rbm12b1	4.2	-0.134	0.0825	-0.141	-0.00123	0.0082	0.0955	0.105	0.92	0.931	0.926
Il12rb2	0.313	0.103	0.734	-0.387	-0.000436	0.00811	0.0916	0.105	0.92	0.931	0.926
Zbtb20	8.56	-0.0229	0.824	-0.112	-0.00156	0.00826	0.0981	0.105	0.92	0.931	0.926
Guca1b	-0.167	0.145	0.668	-0.431	-0.000398	0.00811	0.085	0.105	0.92	0.931	0.926
Tmem150a	3.56	0.0228	0.844	-0.129	-0.00135	0.00822	0.0923	0.105	0.92	0.931	0.926
Myc	2.4	0.155	0.0735	0.16	0.00104	0.00817	0.0916	0.105	0.92	0.931	0.926
Dlg5	6.49	-0.0086	0.894	-0.066	-0.00276	0.00859	0.0872	0.105	0.92	0.931	0.926
Itgb1	5.7	0.0628	0.182	-0.0824	-0.00216	0.0084	0.0854	0.106	0.92	0.931	0.926
Musk	0.132	0.142	0.668	-0.431	-0.000403	0.00811	0.0893	0.106	0.92	0.931	0.926
Ap4e1	4.11	0.0127	0.919	-0.117	-0.00147	0.00824	0.098	0.106	0.92	0.931	0.926
Ccdc24	0.574	-0.128	0.747	0.474	0.000357	0.00811	0.0984	0.106	0.92	0.931	0.926
RP23-132N23.23	1.43	0.542	0.463	-1.04	-0.000117	0.0081	0.0969	0.106	0.92	0.931	0.926
B3galt5	6.35	0.114	0.0164	-0.0936	-0.00188	0.00833	0.0925	0.106	0.92	0.931	0.926
Utp20	5.36	-0.0291	0.567	-0.0688	-0.00249	0.0085	0.0978	0.106	0.92	0.931	0.926
Sptlc1	5.09	0.0238	0.675	-0.0739	-0.00238	0.00847	0.0861	0.107	0.92	0.931	0.926
Mbp	10.7	0.0395	0.552	-0.0911	-0.00193	0.00834	0.0943	0.107	0.92	0.931	0.926
Taco1	3.61	0.00922	0.947	-0.124	-0.00141	0.00823	0.0863	0.107	0.92	0.931	0.926
Tmem229a	5.75	-0.0235	0.716	-0.0798	-0.00221	0.00842	0.0879	0.107	0.92	0.931	0.926
Fam167a	1.86	-0.013	0.961	-0.227	-0.000763	0.00814	0.0923	0.107	0.92	0.931	0.926
Fbxl20	6.4	0.0195	0.639	-0.0568	-0.00325	0.00877	0.0758	0.107	0.92	0.931	0.926
Dcdc2a	3.23	0.0517	0.599	-0.132	-0.0013	0.00821	0.0889	0.108	0.92	0.931	0.926
Sgk2	0.642	0.176	0.425	-0.331	-0.000511	0.00812	0.095	0.108	0.92	0.931	0.926
Mospd3	3.65	0.0641	0.517	-0.136	-0.00128	0.00821	0.0974	0.108	0.92	0.931	0.926
Kl	4.59	0.439	0.104	-0.481	-0.000365	0.00811	0.0946	0.108	0.92	0.931	0.926
H6pd	3.25	0.011	0.946	-0.14	-0.0012	0.00819	0.0994	0.108	0.92	0.931	0.926
Igdcc4	6.24	-0.0173	0.753	-0.0665	-0.0027	0.00857	0.0838	0.108	0.92	0.931	0.926
Rfx4	3.89	-0.108	0.0667	0.113	0.00149	0.00825	0.0862	0.109	0.92	0.931	0.926
Gnptab	6.69	0.0613	0.0937	-0.0671	-0.00263	0.00854	0.0866	0.109	0.92	0.931	0.926
Rnf168	5.28	-0.0263	0.63	-0.0714	-0.00241	0.00847	0.0933	0.109	0.92	0.931	0.926
Atxn1	6.51	-0.00925	0.887	-0.0666	-0.00265	0.00855	0.0915	0.109	0.92	0.931	0.926
Zdhhc4	3.69	0.12	0.142	-0.141	-0.00122	0.0082	0.0992	0.109	0.92	0.931	0.926
Nwd2	5.77	-0.0301	0.604	-0.0771	-0.00226	0.00843	0.0968	0.109	0.92	0.931	0.926
Gng5	3.6	0.0745	0.45	-0.143	-0.0012	0.00819	0.0971	0.11	0.92	0.931	0.926
Sept4	6.38	0.0348	0.666	-0.102	-0.00169	0.00829	0.0998	0.111	0.92	0.931	0.926
Rnf13	6.12	0.0127	0.835	-0.0709	-0.0025	0.0085	0.0823	0.111	0.92	0.931	0.926
Pcbd1	1.96	0.111	0.339	-0.193	-0.000894	0.00815	0.0757	0.111	0.92	0.931	0.926
Slc35a4	5.44	0.0397	0.409	-0.0743	-0.00236	0.00846	0.0867	0.111	0.92	0.931	0.926
Papolg	4.61	-0.0902	0.0235	-0.0798	-0.00216	0.0084	0.0819	0.111	0.92	0.931	0.926
Zscan29	3.45	-0.15	0.0543	-0.144	-0.00116	0.00819	0.0984	0.111	0.92	0.931	0.926
Unc119	4.37	-0.00745	0.935	-0.0869	-0.00195	0.00835	0.0825	0.111	0.92	0.931	0.926
Zcchc24	5.85	0.0895	0.2	-0.115	-0.0015	0.00825	0.0992	0.111	0.92	0.931	0.926
Elp2	6.71	0.0132	0.706	-0.0465	-0.004	0.00907	0.0719	0.111	0.92	0.931	0.926
Cep95	3.5	-0.0583	0.48	-0.118	-0.00135	0.00822	0.0996	0.112	0.92	0.931	0.926
Patl1	4.91	-0.0418	0.363	-0.0709	-0.00232	0.00845	0.0923	0.112	0.92	0.931	0.926
Actl6a	3.24	-0.0258	0.817	-0.127	-0.00129	0.00821	0.0942	0.112	0.92	0.931	0.926
Chd9	6.34	-0.021	0.732	-0.0734	-0.00234	0.00845	0.0967	0.112	0.92	0.931	0.926
Wdr26	7.31	0.0789	0.000201	-0.0465	-0.00381	0.00898	0.0881	0.112	0.92	0.931	0.926
Pcp4l1	5.3	0.0252	0.765	-0.0985	-0.00172	0.00829	0.0986	0.112	0.92	0.931	0.926
Bicd2	6.86	-0.0304	0.427	-0.0571	-0.00303	0.00868	0.0925	0.112	0.92	0.931	0.926
Cdh4	4.34	-0.0188	0.823	0.0962	0.00181	0.00831	0.0864	0.113	0.92	0.931	0.926
Gan	5.78	-0.0336	0.569	-0.0788	-0.00218	0.0084	0.0986	0.113	0.92	0.931	0.926
Prss53	2.2	0.0272	0.903	-0.214	-0.000799	0.00814	0.1	0.103	0.921	0.931	0.926
Morf4l1	8.26	-0.0234	0.435	0.0427	0.00455	0.00949	0.106	0.0767	0.924	0.928	0.926
RP24-267P9.1	0.054	-0.164	0.729	0.562	0.000328	0.00811	0.104	0.0816	0.924	0.928	0.926
Emx1	2.31	-0.164	0.204	0.203	0.000915	0.00816	0.104	0.083	0.924	0.928	0.926
Bcan	7.72	0.0247	0.504	0.0504	0.0037	0.00902	0.106	0.084	0.924	0.928	0.926
Pgm2l1	8.85	-0.0427	0.15	0.0495	0.00368	0.00901	0.106	0.0858	0.924	0.928	0.926
Dnm3	7.34	-0.00603	0.935	0.0653	0.00281	0.00863	0.106	0.0864	0.924	0.928	0.926
Sh2d5	6.27	0.00385	0.958	0.059	0.00306	0.00873	0.106	0.0868	0.924	0.928	0.926
Ankzf1	3.71	0.0366	0.89	0.263	0.000687	0.00813	0.106	0.0875	0.924	0.928	0.926
Zkscan2	5.62	0.00989	0.932	0.103	0.00173	0.0083	0.106	0.0911	0.924	0.928	0.926
Pon3	0.532	0.47	0.163	-0.557	-0.000297	0.00811	0.107	0.0913	0.924	0.928	0.926
Zfand1	3.26	0.0483	0.709	0.154	0.00114	0.00819	0.105	0.0921	0.924	0.928	0.926
Cdc123	4.79	-0.0368	0.677	0.107	0.00164	0.00828	0.107	0.0929	0.924	0.928	0.926
Bmpr2	7.67	-0.0104	0.86	0.0606	0.00289	0.00865	0.106	0.0932	0.924	0.928	0.926
Fndc3b	4.74	0.0077	0.945	-0.0973	-0.00174	0.0083	0.097	0.113	0.92	0.931	0.926
Vcpkmt	2.94	0.0178	0.894	-0.135	-0.00122	0.0082	0.0919	0.113	0.92	0.931	0.926
Npy5r	2.77	0.0178	0.907	-0.15	-0.00111	0.00818	0.0976	0.113	0.92	0.931	0.926
Pm20d1	1.45	0.00368	0.993	-0.289	-0.000589	0.00812	0.1	0.108	0.921	0.931	0.926
Col4a3bp	6.41	-0.0255	0.399	-0.0461	-0.00371	0.00894	0.0903	0.114	0.92	0.932	0.926
Agap3	7.25	-0.0419	0.259	0.0576	0.00315	0.00876	0.107	0.0889	0.924	0.928	0.926
Ergic2	5.07	-0.0207	0.808	0.0924	0.00192	0.00835	0.107	0.0918	0.924	0.928	0.926
Fgd2	2.01	0.236	0.316	-0.376	-0.000477	0.00811	0.102	0.0954	0.922	0.93	0.926
Necab1	6.64	-0.108	0.177	0.134	0.00134	0.00822	0.102	0.0969	0.922	0.93	0.926
Fuk	4.1	-0.0718	0.731	0.244	0.000721	0.00813	0.102	0.0974	0.922	0.93	0.926
Zmym5	4.65	0.0111	0.894	-0.0824	-0.002	0.00835	0.0979	0.114	0.92	0.932	0.926
Gmnn	0.594	-0.191	0.32	0.318	0.000505	0.00812	0.0895	0.114	0.92	0.932	0.926
Smarca4	7.71	-0.0229	0.435	0.0413	0.00501	0.00983	0.11	0.067	0.926	0.927	0.926
Olfr1156	0.417	-0.0966	0.835	0.506	0.000382	0.00811	0.108	0.0713	0.926	0.927	0.926
Rnasel	3.67	-0.0688	0.439	0.13	0.0013	0.00821	0.102	0.0991	0.922	0.93	0.926
Fam177a	4.06	1.01	0.114	-0.991	-8.65e-05	0.0081	0.101	0.102	0.922	0.931	0.926
RP24-84I4.2	2.86	-0.184	0.064	-0.181	-0.000939	0.00816	0.101	0.106	0.922	0.931	0.926
Dcp1a	4.77	-0.0596	0.361	-0.0983	-0.00169	0.00828	0.101	0.112	0.922	0.931	0.926
Cdh15	1.16	0.156	0.396	-0.268	-0.000637	0.00813	0.102	0.106	0.922	0.931	0.926
Fastkd5	3.1	-0.0823	0.452	-0.158	-0.00105	0.00817	0.102	0.107	0.922	0.931	0.927
Bptf	7.53	0.00453	0.928	-0.0466	-0.00379	0.00897	0.0929	0.114	0.92	0.933	0.927
Akap5	6.8	-0.0605	0.11	0.0643	0.00292	0.00869	0.109	0.0796	0.926	0.928	0.927
Cyr61	2.76	1.77	1.22e-13	0.476	0.000398	0.00811	0.109	0.0798	0.926	0.928	0.927
Gapdh	11.1	-0.02	0.451	0.0372	0.00507	0.00976	0.109	0.0812	0.926	0.928	0.927
Thumpd1	5.77	-0.0293	0.494	0.0584	0.00309	0.00874	0.108	0.0873	0.926	0.928	0.927
Tmsb10	6.19	-0.135	0.141	0.154	0.00116	0.00819	0.108	0.0894	0.926	0.928	0.927
Fam58b	3.33	-0.0172	0.88	0.116	0.00136	0.00822	0.103	0.113	0.923	0.931	0.927
Fam43a	3.37	0.0742	0.533	0.157	0.00111	0.00818	0.107	0.0956	0.924	0.93	0.927
Itgb3bp	-0.0837	-0.132	0.808	0.594	0.000282	0.0081	0.104	0.0963	0.924	0.93	0.927
Kcnab3	4.32	-0.0796	0.581	0.185	0.000948	0.00816	0.104	0.0974	0.924	0.93	0.927
Yif1a	3.15	-0.0278	0.836	0.145	0.00119	0.00819	0.105	0.0985	0.924	0.93	0.927
Hexim2	2.9	0.00736	0.969	0.15	0.00112	0.00818	0.106	0.0988	0.924	0.93	0.927
Sephs2	4.97	0.00122	0.991	0.0739	0.00228	0.00844	0.105	0.0989	0.924	0.93	0.927
Bag6	7.82	0.0184	0.418	0.0319	0.00625	0.0106	0.113	0.0714	0.927	0.927	0.927
Cand1	7.53	-0.0056	0.873	0.0341	0.00584	0.0103	0.117	0.0716	0.927	0.927	0.927
Morc3	4.87	-0.041	0.442	-0.0778	-0.00211	0.00839	0.101	0.114	0.922	0.932	0.927
Tnfrsf22	1.4	0.121	0.493	-0.247	-0.000644	0.00813	0.102	0.114	0.922	0.932	0.927
Ubb	10.6	-0.0456	0.31	0.0675	0.00265	0.00857	0.111	0.0884	0.927	0.928	0.927
Gucy1a2	2.35	-0.258	0.425	0.478	0.000379	0.00811	0.104	0.0997	0.924	0.931	0.927
Nhp2	3.84	-0.00382	0.986	0.16	0.00107	0.00818	0.106	0.101	0.924	0.931	0.927
Ak7	2.04	0.0988	0.605	-0.246	-0.000686	0.00813	0.104	0.105	0.924	0.931	0.927
H2-T24	3.37	-0.1	0.305	-0.151	-0.00113	0.00818	0.104	0.107	0.924	0.931	0.927
Arap1	3.99	0.00669	0.96	-0.109	-0.00155	0.00826	0.104	0.107	0.924	0.931	0.927
Cox4i2	-0.152	-0.067	0.887	-0.479	-0.000349	0.00811	0.103	0.109	0.924	0.931	0.927
Irf9	3.68	-0.23	0.0118	-0.176	-0.000939	0.00816	0.106	0.111	0.924	0.931	0.927
Mthfd2	2.81	0.138	0.27	-0.197	-0.000848	0.00815	0.105	0.111	0.924	0.931	0.927
Elp6	3.15	-0.0126	0.923	0.12	0.00129	0.00821	0.104	0.112	0.924	0.931	0.927
Vmn1r201	-0.317	0.161	0.653	-0.466	-0.000349	0.00811	0.106	0.112	0.924	0.931	0.927
Tmem237	4.35	-0.00621	0.963	-0.113	-0.00147	0.00824	0.103	0.113	0.923	0.931	0.927
Preb	5.92	0.102	1.43e-05	-0.0549	-0.00319	0.00873	0.0768	0.115	0.92	0.934	0.927
RP23-350C1.3	2.57	-0.0396	0.749	-0.147	-0.00111	0.00818	0.0874	0.116	0.92	0.934	0.927
Zfp300	1.53	-0.0425	0.829	-0.212	-0.000768	0.00814	0.0866	0.116	0.92	0.934	0.927
Gpr157	1.55	0.00432	0.989	-0.246	-0.000677	0.00813	0.0915	0.116	0.92	0.934	0.927
Cyp4f16	1.35	0.15	0.822	0.749	0.000195	0.0081	0.0998	0.116	0.92	0.934	0.927
Dtx4	6.13	-0.116	0.000146	-0.0651	-0.00256	0.00851	0.0989	0.117	0.92	0.934	0.927
Acbd5	6.19	0.025	0.554	-0.0593	-0.00295	0.00864	0.0859	0.117	0.92	0.934	0.927
RP23-281F13.1	1.16	0.0786	0.722	-0.303	-0.000618	0.00812	0.0671	0.119	0.92	0.934	0.927
Qsox2	5.14	-0.024	0.659	-0.069	-0.00237	0.00845	0.0946	0.119	0.92	0.934	0.927
Mllt10	5.58	0.106	0.000169	-0.0626	-0.0027	0.00855	0.0855	0.119	0.92	0.934	0.927
Morc2b	1.29	0.0666	0.765	-0.272	-0.000619	0.00812	0.0857	0.12	0.92	0.934	0.927
Dab1	7.12	0.0502	0.125	-0.0577	-0.00292	0.00862	0.0924	0.12	0.92	0.934	0.927
Yy1	6.42	-0.0139	0.788	-0.0581	-0.00286	0.0086	0.0982	0.12	0.92	0.934	0.927
Fuca2	5.05	0.00332	0.971	-0.0758	-0.00222	0.00841	0.0874	0.121	0.92	0.934	0.927
Zfp459	0.671	-0.256	0.135	0.31	0.00051	0.00812	0.0859	0.123	0.92	0.934	0.927
Creb3l2	4.62	0.0306	0.68	-0.0951	-0.00177	0.0083	0.0882	0.123	0.92	0.934	0.927
Ifnar2	3.95	-0.0635	0.204	-0.0917	-0.00176	0.0083	0.0722	0.123	0.92	0.934	0.927
Tceal1	4.44	0.0382	0.574	-0.0914	-0.00176	0.0083	0.0975	0.124	0.92	0.934	0.927
Foxj2	5.54	0.0134	0.786	-0.0602	-0.0028	0.00858	0.0758	0.124	0.92	0.934	0.927
B3galt4	1.83	-0.11	0.381	0.189	0.000819	0.00814	0.095	0.125	0.92	0.934	0.927
Zfp54	0.0989	0.000102	1	-0.376	-0.000404	0.00811	0.0994	0.126	0.92	0.934	0.927
Ifitm10	3.93	0.0571	0.455	-0.11	-0.00147	0.00823	0.0996	0.126	0.92	0.934	0.927
Glb1l2	0.0847	0.479	0.0432	-0.459	-0.000339	0.00811	0.0953	0.127	0.92	0.934	0.927
RP23-117O14.2	3.16	0.0435	0.605	-0.12	-0.00134	0.00821	0.0701	0.128	0.92	0.934	0.927
Polr2h	3.82	0.00371	0.976	-0.104	-0.00149	0.00824	0.0917	0.131	0.92	0.934	0.927
Mcrip2	2.78	0.0466	0.662	-0.133	-0.00112	0.00818	0.0984	0.132	0.92	0.934	0.927
Lats1	5.76	-0.037	0.273	-0.054	-0.00291	0.0086	0.0966	0.133	0.92	0.934	0.927
Hipk1	7.41	0.0208	0.394	-0.0373	-0.00441	0.00912	0.0898	0.134	0.92	0.934	0.927
Fam109a	3.23	-0.0891	0.168	-0.114	-0.00131	0.00821	0.0853	0.135	0.92	0.934	0.927
Agk	5.29	-0.0233	0.672	-0.0717	-0.00219	0.00839	0.0885	0.136	0.92	0.934	0.927
Dclre1c	4	0.000268	0.998	-0.0928	-0.00164	0.00826	0.0901	0.138	0.92	0.934	0.927
Yae1d1	5.3	0.0112	0.853	-0.0656	-0.00237	0.00843	0.0957	0.139	0.92	0.934	0.927
Commd9	4.08	0.0218	0.792	-0.097	-0.00156	0.00825	0.0928	0.143	0.92	0.934	0.927
Clk1	4.36	-1	0.000684	-0.673	-0.000224	0.0081	0.0827	0.156	0.92	0.934	0.927
Hk1	8.91	0.00145	0.978	0.0407	0.00467	0.00954	0.116	0.0802	0.927	0.928	0.927
Psip1	7.61	-0.0401	0.095	0.0407	0.00457	0.00948	0.112	0.0825	0.927	0.928	0.927
Tpm1	7.39	-0.0287	0.137	0.0318	0.00573	0.0101	0.113	0.0828	0.927	0.928	0.927
Top2b	6.83	-0.00416	0.926	0.0391	0.00451	0.00944	0.117	0.0834	0.927	0.928	0.927
Pcdhb7	3.14	-0.0211	0.927	0.203	0.00087	0.00815	0.114	0.09	0.927	0.928	0.927
Rps15	7.62	-0.0209	0.622	0.0526	0.00339	0.00886	0.114	0.0907	0.927	0.928	0.927
Rpl7	7.37	0.00119	0.983	0.0419	0.00409	0.00919	0.117	0.0912	0.927	0.928	0.927
Gprin1	7.56	-0.0479	0.192	0.0586	0.00302	0.00871	0.113	0.0913	0.927	0.928	0.927
Grik2	6.32	-0.0149	0.773	0.057	0.00304	0.00871	0.112	0.0929	0.927	0.928	0.927
Zbtb34	4.11	-0.0818	0.186	-0.103	-0.00154	0.00825	0.1	0.128	0.921	0.934	0.928
Nit2	2.85	-0.0832	0.378	0.14	0.00112	0.00818	0.107	0.112	0.924	0.931	0.928
Ubc	9.67	0.0251	0.47	0.0467	0.00369	0.00899	0.119	0.0933	0.928	0.928	0.928
Zfp128	2.82	-0.211	0.0645	-0.203	-0.000802	0.00814	0.107	0.113	0.924	0.931	0.928
Bphl	4.18	-0.0571	0.43	0.105	0.00153	0.00825	0.106	0.114	0.924	0.932	0.928
Htr4	3.98	-0.0212	0.877	-0.137	-0.0012	0.00819	0.106	0.114	0.924	0.932	0.928
Gga1	5.47	-0.0805	0.55	0.168	0.001	0.00817	0.118	0.0936	0.927	0.929	0.928
Clybl	3.85	0.0121	0.933	-0.13	-0.00126	0.0082	0.102	0.116	0.922	0.934	0.928
Siae	4.28	-0.0128	0.894	-0.097	-0.00169	0.00828	0.1	0.116	0.922	0.934	0.928
Kctd6	5.97	-0.0537	0.324	-0.0836	-0.00195	0.00834	0.101	0.121	0.922	0.934	0.928
Rasal3	0.854	-0.0225	0.982	0.772	0.000188	0.0081	0.102	0.122	0.922	0.934	0.928
Plekhb1	7.68	0.0152	0.801	-0.0667	-0.00245	0.00847	0.102	0.123	0.922	0.934	0.928
Frmd3	1.72	0.154	0.281	-0.229	-0.000701	0.00813	0.101	0.125	0.922	0.934	0.928
Wdr3	4.48	0.00628	0.947	-0.082	-0.00189	0.00832	0.101	0.126	0.922	0.934	0.928
Hid1	6.88	0.0342	0.333	-0.0541	-0.00293	0.00861	0.101	0.133	0.922	0.934	0.928
Lin52	4.65	4.5e-05	1	-0.078	-0.00197	0.00834	0.102	0.133	0.922	0.934	0.928
Tmem55a	5.43	-0.0132	0.822	-0.0637	-0.00238	0.00843	0.102	0.143	0.922	0.934	0.928
Pcdh7	6.4	-0.0174	0.822	0.0814	0.00212	0.0084	0.11	0.0976	0.926	0.93	0.928
Car10	5.78	-0.0296	0.765	0.111	0.00157	0.00826	0.11	0.0983	0.926	0.93	0.928
Dpp8	7.73	-0.0259	0.245	0.034	0.00571	0.0102	0.121	0.0753	0.929	0.928	0.928
Gabbr2	8.66	0.0108	0.765	0.0389	0.00479	0.00959	0.122	0.0828	0.929	0.928	0.928
Astn1	8.64	0.0152	0.615	0.0366	0.00508	0.00976	0.123	0.0832	0.929	0.928	0.928
Syt1	10.7	-0.00125	0.974	0.0288	0.00622	0.0104	0.131	0.0852	0.929	0.928	0.928
Eif4b	7.87	0.00171	0.976	0.044	0.00404	0.00917	0.121	0.0886	0.929	0.928	0.928
Extl3	7.34	-0.0153	0.653	0.0401	0.00436	0.00933	0.123	0.0887	0.929	0.928	0.928
Nrxn1	8.86	-0.00687	0.841	0.0339	0.00512	0.00973	0.131	0.0893	0.929	0.928	0.928
Nlgn2	8.31	-0.0146	0.748	0.0488	0.00361	0.00896	0.124	0.0907	0.929	0.928	0.928
Dis3l2	4.63	9.14e-05	1	0.0741	0.00223	0.00843	0.121	0.0915	0.929	0.928	0.928
Prpf8	8.39	0.0238	0.409	0.0393	0.00446	0.00936	0.127	0.0927	0.929	0.928	0.928
Sgta	6.87	0.024	0.502	0.0456	0.00368	0.00899	0.133	0.0916	0.929	0.928	0.928
Klhl8	5.21	-0.0837	0.0661	-0.0824	-0.00202	0.00836	0.103	0.116	0.923	0.934	0.928
RP23-83N17.1	6.72	-0.0641	0.12	-0.0711	-0.00235	0.00845	0.103	0.117	0.923	0.934	0.928
Sh3rf3	5.42	-0.0683	0.308	-0.103	-0.0016	0.00826	0.103	0.118	0.923	0.934	0.928
Neurl2	1.42	0.0563	0.775	-0.223	-0.000699	0.00813	0.103	0.122	0.923	0.934	0.928
Cops4	5.87	0.0218	0.615	-0.0564	-0.00271	0.00854	0.103	0.134	0.923	0.934	0.928
Grem2	4.49	-0.082	0.176	0.099	0.0017	0.00829	0.11	0.0995	0.926	0.931	0.928
Smu1	5.74	0.0121	0.816	0.0561	0.00296	0.00867	0.109	0.1	0.926	0.931	0.928
Grm2	5.71	-0.115	0.0872	0.117	0.00147	0.00824	0.108	0.101	0.926	0.931	0.928
Sned1	4.45	0.0543	0.786	-0.223	-0.000767	0.00814	0.11	0.102	0.926	0.931	0.928
Unc5d	5.73	-0.0325	0.76	0.119	0.00143	0.00824	0.11	0.104	0.926	0.931	0.928
Pdhx	5.56	-0.0453	0.284	0.0655	0.00255	0.00852	0.109	0.104	0.926	0.931	0.928
Mettl17	3.02	-0.0254	0.927	-0.25	-0.000677	0.00813	0.11	0.105	0.926	0.931	0.928
Egf	0.568	-0.106	0.714	0.346	0.000471	0.00811	0.11	0.107	0.926	0.931	0.928
Rpain	2.21	0.0507	0.786	-0.209	-0.000794	0.00814	0.109	0.109	0.926	0.931	0.928
Ppan	3.44	0.0764	0.372	0.124	0.00129	0.00821	0.108	0.113	0.926	0.931	0.928
Rev1	4.67	0.114	0.0424	-0.105	-0.00158	0.00826	0.103	0.116	0.923	0.934	0.928
Rpl4	8.57	-0.00708	0.797	0.0282	0.00613	0.0103	0.133	0.0872	0.929	0.928	0.928
Cenpp	-0.431	0.0295	0.962	0.502	0.000316	0.00811	0.111	0.104	0.927	0.931	0.929
Relb	2.63	0.0315	0.896	-0.233	-0.000704	0.00813	0.111	0.112	0.927	0.931	0.929
Katna1	3.32	0.0107	0.942	-0.129	-0.00124	0.0082	0.103	0.118	0.923	0.934	0.929
Atp6v1f	5.96	-0.0483	0.23	0.0641	0.00264	0.00856	0.112	0.0984	0.927	0.93	0.929
Fam205a2	1.73	-0.141	0.895	0.978	0.000128	0.0081	0.136	0.0862	0.93	0.928	0.929
Fam205a3	1.73	-0.141	0.895	0.978	0.000128	0.0081	0.136	0.0862	0.93	0.928	0.929
RP23-194H4.2	1.13	3.49	0.0314	-2.1	-1.44e-05	0.0081	0.135	0.0914	0.93	0.928	0.929
Chchd7	3.09	-0.0261	0.841	-0.14	-0.00113	0.00818	0.107	0.117	0.924	0.934	0.929
Mylk	4.46	0.0633	0.416	-0.113	-0.00145	0.00823	0.105	0.118	0.924	0.934	0.929
Gpr37	5.93	0.111	0.0255	-0.0931	-0.00177	0.0083	0.104	0.119	0.924	0.934	0.929
B3glct	4.29	0.0273	0.752	-0.0988	-0.00162	0.00827	0.104	0.12	0.924	0.934	0.929
Ak4	6.99	-0.0555	0.344	-0.0879	-0.00185	0.00831	0.106	0.121	0.924	0.934	0.929
Slc5a6	4.53	0.0165	0.869	-0.104	-0.00155	0.00825	0.104	0.121	0.924	0.934	0.929
Heatr5a	4.05	0.0593	0.394	-0.102	-0.00155	0.00825	0.104	0.123	0.924	0.934	0.929
Eif4e2	6	-0.0407	0.361	-0.0665	-0.00241	0.00846	0.104	0.124	0.924	0.934	0.929
Ankrd27	5.52	-0.052	0.182	-0.0645	-0.00244	0.00847	0.107	0.124	0.924	0.934	0.929
Spef2	2.3	0.163	0.224	-0.218	-0.000722	0.00813	0.107	0.126	0.924	0.934	0.929
C2cd3	5.55	0.0424	0.377	-0.0705	-0.00225	0.00841	0.106	0.131	0.924	0.934	0.929
RP23-242O9.1	5.93	-0.0344	0.372	-0.0567	-0.00271	0.00854	0.106	0.135	0.924	0.934	0.929
Mtr	5.2	0.0434	0.285	-0.0628	-0.00238	0.00844	0.106	0.135	0.924	0.934	0.929
Atp1b3	6.28	0.0195	0.653	-0.0541	-0.00275	0.00853	0.105	0.143	0.924	0.934	0.929
Serac1	5.11	-0.051	0.279	-0.0738	-0.00199	0.00833	0.106	0.148	0.924	0.934	0.929
Shpk	2.24	0.0188	0.911	-0.163	-0.000856	0.00814	0.106	0.149	0.924	0.934	0.929
Sh3pxd2b	4.72	0.00395	0.968	-0.0801	-0.00183	0.00829	0.107	0.151	0.924	0.934	0.929
Dlx2	2.14	-0.0144	0.936	0.153	0.000862	0.00814	0.107	0.157	0.924	0.934	0.929
Erich3	4.83	-0.0415	0.567	0.0932	0.00185	0.00833	0.115	0.0944	0.927	0.93	0.929
Zfp260	6.2	-0.0573	0.0706	0.055	0.00308	0.00873	0.116	0.0949	0.927	0.93	0.929
Arfgap1	6.52	0.026	0.612	0.0638	0.00269	0.00858	0.116	0.0951	0.927	0.93	0.929
Rps24	6.81	-0.0205	0.732	0.068	0.00253	0.00852	0.114	0.0958	0.927	0.93	0.929
Anp32e	6.37	-0.017	0.712	0.0529	0.00321	0.00877	0.114	0.0963	0.927	0.93	0.929
Usp29	5.48	0.000737	0.995	0.0962	0.00178	0.00831	0.112	0.0971	0.927	0.93	0.929
Ttc23	0.561	0.13	0.798	0.556	0.000297	0.00811	0.118	0.0972	0.927	0.93	0.929
Fech	5.95	-0.00384	0.945	0.0463	0.00351	0.0089	0.118	0.0977	0.927	0.93	0.929
Cgn	3.53	-0.128	0.209	0.163	0.00105	0.00817	0.112	0.0984	0.927	0.93	0.929
Pomt2	4.78	-0.0497	0.409	0.0864	0.00199	0.00836	0.112	0.0989	0.927	0.93	0.929
Olfr1312	0.329	0.115	0.7	-0.352	-0.000464	0.00811	0.116	0.0992	0.927	0.93	0.929
Thap1	3.11	0.0033	0.983	-0.12	-0.00115	0.00818	0.107	0.155	0.924	0.934	0.929
Fau	6.18	-0.121	0.114	0.128	0.00131	0.00821	0.119	0.0974	0.927	0.93	0.929
Srsf9	3.15	0.0454	0.896	-0.329	-0.000507	0.00812	0.112	0.107	0.927	0.931	0.929
Nsfl1c	6.14	-0.0681	0.177	0.0799	0.00217	0.00841	0.12	0.0952	0.928	0.93	0.929
Tarsl2	5.24	-0.0394	0.57	0.0882	0.00196	0.00836	0.119	0.097	0.928	0.93	0.929
Atf6b	6.44	-0.00922	0.874	0.056	0.003	0.00869	0.119	0.0979	0.928	0.93	0.929
Slbp	4.25	-0.0304	0.732	0.1	0.00166	0.00828	0.117	0.101	0.927	0.931	0.929
Mfge8	7.3	0.0129	0.9	0.0971	0.00174	0.0083	0.117	0.102	0.927	0.931	0.929
Smarce1	5.25	-0.0249	0.612	0.0615	0.00262	0.00855	0.117	0.102	0.927	0.931	0.929
Hras	6.22	-0.026	0.631	0.0658	0.00248	0.0085	0.118	0.104	0.927	0.931	0.929
Asic2	6.11	0.0185	0.758	0.0651	0.00251	0.00851	0.119	0.104	0.927	0.931	0.929
Mgat5b	5.69	-0.0212	0.823	0.1	0.00167	0.00828	0.113	0.104	0.927	0.931	0.929
Zmym2	6.31	0.0099	0.873	0.06	0.0027	0.00857	0.119	0.105	0.927	0.931	0.929
Pim3	4.76	0.256	1.02e-07	0.0985	0.00167	0.00828	0.118	0.105	0.927	0.931	0.929
Dus2	3.26	-0.0819	0.585	0.19	0.000862	0.00815	0.118	0.106	0.927	0.931	0.929
Zfp82	1.85	-0.237	0.389	-0.404	-0.000416	0.00811	0.116	0.106	0.927	0.931	0.929
Angel1	3.09	-0.12	0.155	0.139	0.00116	0.00819	0.112	0.107	0.927	0.931	0.929
Ptges3l	1.18	0.00425	0.99	0.239	0.000677	0.00813	0.116	0.107	0.927	0.931	0.929
0610009O20Rik	5.22	-0.0115	0.845	0.0607	0.00257	0.00853	0.116	0.108	0.927	0.931	0.929
Tceanc	0.968	-0.0545	0.823	0.255	0.000623	0.00812	0.113	0.108	0.927	0.931	0.929
Ebag9	4.35	-0.0285	0.709	0.0876	0.00182	0.00831	0.115	0.109	0.927	0.931	0.929
Trpv4	0.773	0.819	0.168	-0.953	-0.000157	0.0081	0.116	0.109	0.927	0.931	0.929
Cox11	2.91	-0.0848	0.495	0.167	0.000966	0.00816	0.113	0.11	0.927	0.931	0.929
Pramef8	3.9	0.0118	0.92	0.106	0.0015	0.00825	0.114	0.11	0.927	0.931	0.929
Lad1	1.38	-0.109	0.653	0.297	0.00054	0.00812	0.114	0.11	0.927	0.931	0.929
Mrpl46	4.06	-0.00331	0.976	0.0897	0.00172	0.00829	0.113	0.111	0.927	0.931	0.929
Klf5	3.16	-0.19	0.145	0.218	0.000747	0.00814	0.116	0.111	0.927	0.931	0.929
Rpap1	4.47	-0.00485	0.974	0.113	0.00148	0.00824	0.119	0.103	0.928	0.931	0.929
Atp6v0c	9.56	-0.00741	0.902	0.0558	0.00293	0.00866	0.12	0.104	0.928	0.931	0.929
Slc25a14	5.17	-0.0799	0.142	0.089	0.00183	0.00832	0.12	0.107	0.928	0.931	0.929
Fam189b	5.23	-0.0352	0.768	0.128	0.00127	0.0082	0.119	0.108	0.928	0.931	0.929
Ccdc22	4.6	-0.0608	0.253	0.0816	0.0019	0.00833	0.12	0.109	0.928	0.931	0.929
Rgs17	6.06	-0.0244	0.746	0.0828	0.00193	0.00834	0.12	0.111	0.928	0.931	0.929
Appbp2	6.94	0.00213	0.962	0.0356	0.00455	0.00931	0.12	0.111	0.928	0.931	0.929
Lypd6	4.46	0.00761	0.946	0.0919	0.00168	0.00828	0.12	0.112	0.928	0.931	0.929
Cntnap5c	4.58	-0.0608	0.516	-0.127	-0.00129	0.00821	0.107	0.117	0.924	0.934	0.929
Fam71f2	-0.692	0.347	0.567	-0.799	-0.000201	0.0081	0.107	0.123	0.924	0.934	0.929
Ptges2	4.16	0.0193	0.83	-0.0968	-0.00149	0.00823	0.107	0.147	0.924	0.934	0.929
Trak1	7.89	0.0299	0.209	-0.0385	-0.00387	0.00888	0.107	0.148	0.924	0.934	0.929
Sorbs1	6.9	0.0275	0.586	0.0621	0.00275	0.0086	0.124	0.0942	0.929	0.93	0.93
Cmtr1	6.73	-0.00177	0.98	0.0543	0.00313	0.00874	0.121	0.0968	0.929	0.93	0.93
Prune2	6.46	-0.0138	0.827	0.0649	0.00261	0.00855	0.122	0.097	0.929	0.93	0.93
Brk1	6.78	-0.0379	0.165	0.043	0.00384	0.00904	0.124	0.0992	0.929	0.93	0.93
Atp1b2	8.53	0.00346	0.96	0.0524	0.00318	0.00876	0.126	0.0993	0.929	0.93	0.93
Cplx1	9.23	-0.0239	0.368	0.0362	0.00458	0.00939	0.132	0.0981	0.929	0.93	0.93
Nipal3	6.81	-0.0293	0.46	0.0526	0.00313	0.00874	0.128	0.0997	0.929	0.931	0.93
Zranb2	6.93	-0.0391	0.313	0.0563	0.00295	0.00866	0.124	0.1	0.929	0.931	0.93
Ankrd39	1.47	0.0282	0.965	0.533	0.000301	0.00811	0.127	0.101	0.929	0.931	0.93
Pgap2	3.19	0.0481	0.877	0.291	0.000547	0.00812	0.132	0.101	0.929	0.931	0.93
Mrps10	3.6	0.0203	0.861	0.113	0.00139	0.00823	0.127	0.104	0.929	0.931	0.93
Fzd3	6.75	-0.0194	0.732	0.0626	0.00257	0.00853	0.124	0.104	0.929	0.931	0.93
Stip1	7.49	-0.0849	0.0397	0.0715	0.00226	0.00843	0.125	0.104	0.929	0.931	0.93
Trim41	5.85	-0.00136	0.986	0.0538	0.00302	0.00868	0.131	0.105	0.929	0.931	0.93
Gdap1	6.89	-0.0145	0.707	0.0433	0.0037	0.00896	0.125	0.105	0.929	0.931	0.93
Usp9x	8.33	-0.039	0.296	0.0539	0.00298	0.00867	0.128	0.105	0.929	0.931	0.93
Pcx	6.31	-0.00433	0.947	0.0513	0.00312	0.00872	0.129	0.106	0.929	0.931	0.93
Elk1	6.62	-0.0677	0.313	0.0977	0.00166	0.00828	0.122	0.106	0.929	0.931	0.93
Syt13	7.99	-0.00655	0.89	0.0428	0.00373	0.00896	0.132	0.107	0.929	0.931	0.93
Fam171a2	6.11	-0.0792	0.0623	0.0708	0.00226	0.00843	0.124	0.107	0.929	0.931	0.93
Rpa1	6.05	-0.00937	0.873	0.0559	0.00283	0.00861	0.128	0.107	0.929	0.931	0.93
Pacrgl	1.95	-0.307	0.202	0.367	0.000431	0.00811	0.123	0.108	0.929	0.931	0.93
Cmya5	3.21	0.0411	0.765	0.148	0.00107	0.00817	0.124	0.109	0.929	0.931	0.93
Zfp39	3.49	-0.0234	0.86	0.133	0.0012	0.00819	0.121	0.109	0.929	0.931	0.93
Ccdc186	5.84	-0.0788	0.00142	0.0471	0.00327	0.00877	0.127	0.11	0.929	0.931	0.93
Ift20	4.5	0.0168	0.848	0.0881	0.00174	0.0083	0.127	0.11	0.929	0.931	0.93
Asxl3	4.06	0.0673	0.447	0.122	0.0013	0.00821	0.122	0.11	0.929	0.931	0.93
Cd34	5.34	-0.0268	0.762	0.0962	0.00165	0.00828	0.127	0.11	0.929	0.931	0.93
Akap7	4.68	-0.162	0.0232	0.125	0.00128	0.00821	0.13	0.111	0.929	0.931	0.93
Trp53i11	6.05	0.0229	0.732	0.0741	0.00212	0.00839	0.124	0.111	0.929	0.931	0.93
Surf2	3.59	0.114	0.361	0.179	0.00089	0.00815	0.122	0.111	0.929	0.931	0.93
Prdm10	5.16	-0.0482	0.361	0.0747	0.00212	0.00839	0.122	0.111	0.929	0.931	0.93
Cnot2	5.45	0.0885	0.247	0.116	0.00138	0.00822	0.124	0.112	0.929	0.931	0.93
Pcm1	6.7	-0.0199	0.689	0.0559	0.00277	0.00859	0.132	0.112	0.929	0.931	0.93
Thoc1	5.92	0.0054	0.943	0.06	0.00257	0.00852	0.131	0.112	0.929	0.931	0.93
Igfn1	0.566	0.0286	0.976	0.782	0.000203	0.0081	0.131	0.112	0.929	0.931	0.93
Ntsr1	2.53	-0.192	0.304	0.291	0.000567	0.00812	0.115	0.114	0.927	0.932	0.93
Dbn1	8.19	0.0342	0.252	0.0437	0.00362	0.00892	0.133	0.106	0.929	0.931	0.93
Elp5	4.04	-0.106	0.387	0.169	0.00093	0.00816	0.129	0.113	0.929	0.931	0.93
Adprh	6.23	-0.0158	0.716	0.0487	0.00317	0.00873	0.123	0.113	0.929	0.931	0.93
Wdr44	4.45	-0.0737	0.221	0.0917	0.0017	0.00829	0.128	0.113	0.929	0.931	0.93
Cgnl1	4.26	0.161	0.298	-0.238	-0.000703	0.00813	0.11	0.116	0.926	0.934	0.93
Pabpn1	7.32	-0.0403	0.525	-0.0852	-0.00194	0.00834	0.108	0.118	0.926	0.934	0.93
Slc25a29	4.24	0.00742	0.951	-0.1	-0.00158	0.00826	0.108	0.119	0.926	0.934	0.93
Clcn2	5.76	0.0501	0.476	-0.0987	-0.00165	0.00827	0.11	0.119	0.926	0.934	0.93
Camk2d	5.69	-0.0998	0.495	0.205	0.000799	0.00814	0.109	0.12	0.926	0.934	0.93
Rem2	3.74	0.0843	0.409	-0.144	-0.0011	0.00818	0.109	0.123	0.926	0.934	0.93
Nr4a3	6.7	0.223	2.87e-07	-0.0905	-0.00177	0.00829	0.11	0.123	0.926	0.934	0.93
Lrrc8c	5.36	0.0378	0.592	-0.0902	-0.00175	0.00829	0.109	0.124	0.926	0.934	0.93
Irak1	5.77	0.0301	0.477	-0.0584	-0.00265	0.00853	0.11	0.126	0.926	0.934	0.93
Rab8b	6.36	0.0264	0.671	-0.0749	-0.00211	0.00837	0.108	0.127	0.926	0.934	0.93
Zfp286	3.97	-0.122	0.0091	0.0914	0.00159	0.00826	0.111	0.127	0.926	0.934	0.93
RP24-251F16.4	3.63	-0.014	0.91	-0.117	-0.00134	0.00821	0.11	0.127	0.926	0.934	0.93
Rfx1	5.13	0.0158	0.84	-0.0818	-0.0019	0.00832	0.11	0.128	0.926	0.934	0.93
Elavl2	6.47	-0.0255	0.56	-0.0568	-0.00281	0.00858	0.11	0.128	0.926	0.934	0.93
Pxn	5.65	0.0253	0.71	-0.0787	-0.00197	0.00834	0.11	0.131	0.926	0.934	0.93
Tmem117	2.55	0.121	0.182	-0.148	-0.001	0.00816	0.108	0.132	0.926	0.934	0.93
Bub3	5.78	0.0455	0.229	-0.061	-0.00254	0.00849	0.108	0.133	0.926	0.934	0.93
Oasl2	0.192	0.22	0.706	-0.702	-0.000217	0.0081	0.109	0.133	0.926	0.934	0.93
Rasgrp1	9.26	0.0319	0.505	-0.0647	-0.00239	0.00845	0.109	0.133	0.926	0.934	0.93
Pard6b	2.17	-0.0899	0.53	-0.191	-0.000789	0.00814	0.111	0.133	0.926	0.934	0.93
Erich1	2.53	0.0393	0.793	-0.166	-0.000917	0.00815	0.109	0.135	0.926	0.934	0.93
Tns3	6.64	0.0716	0.0107	-0.0534	-0.00292	0.0086	0.109	0.136	0.926	0.934	0.93
S100pbp	5.29	-0.0357	0.505	-0.0729	-0.002	0.00834	0.11	0.139	0.926	0.934	0.93
Map3k3	5	0.0309	0.588	-0.0738	-0.00198	0.00833	0.11	0.141	0.926	0.934	0.93
Apmap	5.66	0.055	0.141	-0.0627	-0.00234	0.00842	0.11	0.147	0.926	0.934	0.93
Nop56	6.18	0.0123	0.829	-0.0606	-0.00241	0.00843	0.109	0.148	0.926	0.934	0.93
Fitm2	5.25	-0.0391	0.317	-0.059	-0.00232	0.0084	0.11	0.159	0.926	0.934	0.93
Agpat9	1.77	-0.153	0.303	0.222	0.0007	0.00813	0.124	0.113	0.929	0.931	0.93
Grina	8.79	0.0203	0.426	0.0338	0.00496	0.00959	0.134	0.0963	0.93	0.93	0.93
Fscn1	7.07	0.0212	0.607	0.0487	0.00331	0.0088	0.134	0.102	0.93	0.931	0.93
Reps2	8.24	-0.0255	0.337	0.0369	0.00433	0.00925	0.134	0.104	0.93	0.931	0.93
Plagl2	3.58	-0.0664	0.519	-0.139	-0.00116	0.00819	0.111	0.12	0.927	0.934	0.93
Hgf	2.11	0.0572	0.782	-0.227	-0.00069	0.00813	0.111	0.126	0.927	0.934	0.93
Odf2	6.79	0.0657	0.0582	-0.0615	-0.00256	0.0085	0.111	0.13	0.927	0.934	0.93
Tbcel	5.94	-0.00979	0.879	-0.0634	-0.00241	0.00845	0.111	0.134	0.927	0.934	0.93
Ech1	5.06	0.0373	0.463	-0.0714	-0.00199	0.00833	0.111	0.148	0.927	0.934	0.93
Dctn1	8.91	0.00187	0.971	0.0365	0.00441	0.0093	0.136	0.101	0.93	0.931	0.93
Aldoa	10.9	-0.0128	0.712	0.0377	0.00427	0.00922	0.135	0.102	0.93	0.931	0.93
Ap4s1	4.48	-0.0309	0.657	0.0798	0.00189	0.00833	0.135	0.113	0.93	0.931	0.93
Wbp2	8.45	2.64e-05	1	0.0385	0.00424	0.00922	0.136	0.1	0.93	0.931	0.93
Uqcrc1	7.71	0.00769	0.89	0.0499	0.00311	0.00871	0.137	0.111	0.93	0.931	0.93
Mtfr1	2.5	-0.0362	0.876	-0.228	-0.000698	0.00813	0.111	0.12	0.927	0.934	0.931
Ulk1	6.86	-0.0161	0.657	0.0407	0.00374	0.00895	0.137	0.112	0.93	0.931	0.931
Kifc5b	1.66	-0.0973	0.588	-0.229	-0.000701	0.00813	0.112	0.122	0.927	0.934	0.931
Celsr3	7.87	0.0659	0.0534	-0.0604	-0.00262	0.00852	0.111	0.129	0.927	0.934	0.931
Zfp866	4.98	-0.0605	0.27	-0.0843	-0.00193	0.00834	0.113	0.115	0.927	0.934	0.931
Fbxo33	5.1	0.0472	0.75	-0.163	-0.000996	0.00816	0.115	0.115	0.927	0.934	0.931
Paqr6	2.79	0.149	0.333	-0.224	-0.00072	0.00813	0.116	0.115	0.927	0.934	0.931
Prrt3	5.95	-0.0535	0.123	0.0562	0.00277	0.00858	0.119	0.116	0.927	0.934	0.931
Ier2	2.41	0.839	6.79e-13	0.223	0.000706	0.00813	0.118	0.116	0.927	0.934	0.931
Ttf1	3.84	-0.141	0.032	-0.12	-0.00134	0.00821	0.114	0.117	0.927	0.934	0.931
Map3k14	2.33	0.00919	0.971	-0.195	-0.000798	0.00814	0.117	0.119	0.927	0.934	0.931
Trim65	2.87	0.0447	0.823	-0.207	-0.000772	0.00814	0.116	0.119	0.927	0.934	0.931
Bms1	5.47	-0.0316	0.603	-0.0761	-0.00213	0.00838	0.114	0.12	0.927	0.934	0.931
Rimbp3	2.14	-0.0715	0.652	0.189	0.000835	0.00814	0.118	0.12	0.927	0.934	0.931
Uqcc3	3.34	-0.097	0.2	0.119	0.00128	0.0082	0.118	0.12	0.927	0.934	0.931
Ndufaf1	4.12	-0.0455	0.402	0.0766	0.00187	0.00832	0.118	0.12	0.927	0.934	0.931
Panx1	3.35	0.0461	0.681	-0.132	-0.00117	0.00819	0.117	0.121	0.927	0.934	0.931
Rorc	1.14	0.147	0.508	-0.304	-0.000523	0.00812	0.113	0.121	0.927	0.934	0.931
Hspg2	4.14	0.0699	0.498	-0.136	-0.00118	0.00819	0.114	0.121	0.927	0.934	0.931
Mcc	4.71	0.0451	0.649	-0.118	-0.00135	0.00822	0.117	0.122	0.927	0.934	0.931
Thada	4.15	0.00907	0.928	-0.0883	-0.00174	0.00829	0.117	0.122	0.927	0.934	0.931
RP24-175N4.1	3.6	-0.00605	0.963	0.105	0.00143	0.00823	0.114	0.123	0.927	0.934	0.931
Zfpm1	4.23	0.0495	0.566	-0.108	-0.00147	0.00824	0.113	0.124	0.927	0.934	0.931
Nudt2	3.35	-0.00887	0.941	0.102	0.00139	0.00822	0.115	0.124	0.927	0.934	0.931
Lig3	4.97	0.0242	0.796	-0.101	-0.00155	0.00825	0.114	0.124	0.927	0.934	0.931
Ddx20	3.69	-0.0172	0.895	-0.126	-0.00123	0.00819	0.113	0.124	0.927	0.934	0.931
Ctgf	4.08	0.221	0.309	0.335	0.000464	0.00811	0.115	0.124	0.927	0.934	0.931
Sox11	4.34	-0.0418	0.711	-0.127	-0.00123	0.0082	0.116	0.124	0.927	0.934	0.931
Aspn	0.463	0.192	0.426	-0.339	-0.000456	0.00811	0.114	0.125	0.927	0.934	0.931
Stam	4.95	0.0683	0.288	-0.095	-0.00164	0.00827	0.117	0.125	0.927	0.934	0.931
Ttyh2	4.9	0.13	0.0295	-0.107	-0.00147	0.00823	0.118	0.125	0.927	0.934	0.931
Mybl1	1.08	0.0544	0.832	-0.265	-0.000578	0.00812	0.114	0.125	0.927	0.934	0.931
Baz2a	6.89	-0.0225	0.633	-0.058	-0.00273	0.00855	0.113	0.126	0.927	0.934	0.931
Tmem150b	-0.00754	0.0103	0.983	0.357	0.000397	0.00811	0.117	0.128	0.927	0.934	0.931
Soat1	5.44	-0.00758	0.931	-0.0757	-0.00206	0.00836	0.113	0.129	0.927	0.934	0.931
Trim11	4.95	-0.028	0.59	-0.0659	-0.00228	0.00842	0.113	0.131	0.927	0.934	0.931
Topors	4.64	-0.041	0.507	-0.0827	-0.0018	0.0083	0.115	0.131	0.927	0.934	0.931
Zbtb26	3.4	-0.191	0.00548	-0.13	-0.00116	0.00818	0.117	0.131	0.927	0.934	0.931
Usp54	6.63	0.035	0.559	-0.0775	-0.00198	0.00834	0.115	0.131	0.927	0.934	0.931
Tnfaip8l1	2.78	0.0967	0.275	-0.135	-0.00109	0.00817	0.116	0.132	0.927	0.934	0.931
Slc44a2	5.52	0.0187	0.719	-0.06	-0.00246	0.00846	0.116	0.133	0.927	0.934	0.931
Ung	0.319	-0.217	0.39	0.357	0.000409	0.00811	0.116	0.133	0.927	0.934	0.931
Dnah6	2.47	0.15	0.436	-0.265	-0.000568	0.00812	0.118	0.133	0.927	0.934	0.931
Stk39	5.89	0.0169	0.832	-0.0837	-0.00182	0.0083	0.116	0.133	0.927	0.934	0.931
Irf5	1.84	0.104	0.452	-0.196	-0.000757	0.00814	0.112	0.134	0.927	0.934	0.931
Rnpc3	4.97	-0.0513	0.437	-0.0909	-0.00165	0.00827	0.119	0.136	0.927	0.934	0.931
Zfp964	2.54	0.0343	0.834	-0.173	-0.000868	0.00815	0.115	0.136	0.927	0.934	0.931
Dusp16	3.6	-0.0217	0.822	-0.102	-0.00137	0.00821	0.115	0.137	0.927	0.934	0.931
Tph2	0.00483	-0.0433	0.909	0.359	0.000385	0.00811	0.118	0.139	0.927	0.934	0.931
Cfap45	1.9	0.0397	0.847	-0.212	-0.000701	0.00813	0.115	0.139	0.927	0.934	0.931
Pim1	0.915	-0.174	0.415	0.295	0.000481	0.00811	0.118	0.14	0.927	0.934	0.931
Kcnh1	6.09	0.0528	0.291	-0.0741	-0.00198	0.00833	0.118	0.141	0.927	0.934	0.931
Ddt	3.85	0.0535	0.512	-0.11	-0.00136	0.00821	0.113	0.142	0.927	0.934	0.931
Fam210b	5.36	0.0572	0.112	-0.0606	-0.0024	0.00844	0.112	0.142	0.927	0.934	0.931
Ctps	5.24	0.0164	0.814	-0.0746	-0.00197	0.00833	0.114	0.142	0.927	0.934	0.931
Gcnt2	4.77	0.0682	0.131	-0.0743	-0.00197	0.00833	0.115	0.143	0.927	0.934	0.931
Nrf1	4.37	0.0466	0.431	-0.0825	-0.00171	0.00827	0.118	0.145	0.927	0.934	0.931
Tsc22d2	5.43	-0.0627	0.167	-0.0721	-0.00201	0.00834	0.115	0.146	0.927	0.934	0.931
Zfp521	3.19	0.0522	0.592	-0.123	-0.00117	0.00818	0.117	0.147	0.927	0.934	0.931
Nme2	5.83	0.0264	0.604	-0.0646	-0.00225	0.00839	0.113	0.147	0.927	0.934	0.931
Ankrd13b	6.35	0.0204	0.625	-0.0505	-0.00287	0.00856	0.118	0.151	0.927	0.934	0.931
Fdps	5.41	-0.00929	0.89	-0.0649	-0.00215	0.00836	0.115	0.154	0.927	0.934	0.931
Grk1	1.13	-0.0824	0.706	0.25	0.000556	0.00812	0.112	0.154	0.927	0.934	0.931
Rragc	6.01	-0.0113	0.83	-0.0553	-0.0025	0.00845	0.114	0.158	0.927	0.934	0.931
Zfp81	4.99	-0.0447	0.301	-0.0649	-0.00211	0.00835	0.112	0.16	0.927	0.934	0.931
Zfp518b	4.25	-0.0328	0.648	-0.0865	-0.00153	0.00823	0.119	0.173	0.927	0.934	0.931
Szt2	6.42	0.0524	0.271	-0.0713	-0.00214	0.00837	0.119	0.135	0.928	0.934	0.931
Cfap65	3.2	0.23	0.0509	-0.206	-0.000727	0.00813	0.12	0.137	0.928	0.934	0.931
Zfp93	3.53	-0.119	0.0938	-0.12	-0.00121	0.00819	0.119	0.137	0.928	0.934	0.931
Cwc27	3.67	-0.0507	0.507	0.101	0.0014	0.00822	0.119	0.137	0.928	0.934	0.931
Inhba	3.4	-0.0389	0.859	-0.211	-0.000695	0.00813	0.12	0.139	0.928	0.934	0.931
Usp31	7.24	-0.0061	0.911	-0.0501	-0.00287	0.00856	0.12	0.148	0.928	0.934	0.931
Ncbp1	6.15	0.0417	0.207	-0.0519	-0.0026	0.00847	0.119	0.162	0.928	0.934	0.931
Gorasp1	5.43	-0.0143	0.802	-0.06	-0.00225	0.00838	0.119	0.162	0.928	0.934	0.931
Bclaf1	7.03	0.00107	0.988	0.0471	0.00339	0.00884	0.139	0.102	0.931	0.931	0.931
Eef1a2	9.8	-0.0368	0.187	0.0416	0.00377	0.00898	0.139	0.108	0.931	0.931	0.931
Ppp1r9a	8.3	0.0132	0.663	0.0339	0.00485	0.00953	0.139	0.098	0.931	0.93	0.931
Arfgef3	7.61	-0.0285	0.559	0.0588	0.00261	0.00853	0.139	0.113	0.931	0.931	0.931
Trub1	4.96	0.0139	0.867	0.0798	0.00194	0.00834	0.125	0.114	0.929	0.934	0.931
Lmo3	7.22	0.00208	0.98	0.0622	0.00248	0.00849	0.13	0.115	0.929	0.934	0.931
Ncoa5	6.04	-0.024	0.653	0.0616	0.00251	0.0085	0.13	0.115	0.929	0.934	0.931
Slc30a9	6	-0.049	0.365	0.0739	0.00207	0.00837	0.131	0.115	0.929	0.934	0.931
Tia1	6.05	-0.0159	0.904	0.118	0.00132	0.00821	0.132	0.115	0.929	0.934	0.931
Mrs2	6.9	-0.0329	0.302	0.0457	0.00341	0.00881	0.132	0.115	0.929	0.934	0.931
Vmn1r209	0.000643	-0.165	0.596	0.377	0.000401	0.00811	0.124	0.115	0.929	0.934	0.931
Trip10	2.56	0.0748	0.644	-0.193	-0.000839	0.00814	0.123	0.116	0.929	0.934	0.931
Anapc4	3.69	0.0756	0.626	-0.187	-0.000852	0.00815	0.121	0.116	0.929	0.934	0.931
Crxos	0.161	0.0964	0.781	-0.36	-0.000413	0.00811	0.126	0.117	0.929	0.934	0.931
Slc25a18	5.74	-0.00362	0.974	0.0841	0.00182	0.00831	0.131	0.117	0.929	0.934	0.931
Ilf2	5.31	-0.0641	0.465	0.117	0.00133	0.00821	0.126	0.117	0.929	0.934	0.931
Tgfbrap1	6.18	0.0147	0.728	0.0474	0.00331	0.00877	0.121	0.118	0.929	0.934	0.931
Ecsit	5.3	0.000276	0.997	0.0624	0.00238	0.00846	0.126	0.118	0.929	0.934	0.931
Plxdc1	4.05	-0.162	0.306	0.239	0.000665	0.00813	0.123	0.119	0.929	0.934	0.931
Zfp809	3.44	-0.0208	0.852	-0.11	-0.00137	0.00822	0.131	0.119	0.929	0.934	0.931
Cwc22	4.32	0.0148	0.923	0.13	0.00117	0.00819	0.132	0.12	0.929	0.934	0.931
Omg	6.48	0.0192	0.791	0.0754	0.002	0.00835	0.131	0.12	0.929	0.934	0.931
Adck2	4.27	-0.0681	0.287	0.0928	0.00162	0.00827	0.132	0.12	0.929	0.934	0.931
Faxc	3.39	-0.0586	0.675	0.158	0.000963	0.00816	0.131	0.12	0.929	0.934	0.931
Prcc	5.29	-0.0149	0.769	0.054	0.0027	0.00855	0.125	0.12	0.929	0.934	0.931
Rfc3	1.72	-0.0229	0.937	0.242	0.000624	0.00812	0.129	0.12	0.929	0.934	0.931
Arl6	4.39	0.0279	0.679	0.0784	0.00189	0.00833	0.124	0.12	0.929	0.934	0.931
Eif5a2	5.91	-0.0415	0.222	0.0512	0.00291	0.00862	0.13	0.122	0.929	0.934	0.931
Nsun4	3.36	-0.0313	0.772	0.115	0.00127	0.0082	0.13	0.123	0.929	0.934	0.931
Hsdl2	4.75	-0.0135	0.845	0.0692	0.00208	0.00837	0.128	0.125	0.929	0.934	0.931
9930111J21Rik1	0.121	0.0242	0.966	-0.422	-0.000343	0.00811	0.129	0.126	0.929	0.934	0.931
Tomm5	4.22	-0.0448	0.493	0.0853	0.00168	0.00828	0.131	0.126	0.929	0.934	0.931
Mertk	5.62	0.0218	0.877	0.132	0.00114	0.00818	0.128	0.126	0.929	0.934	0.931
Acot6	3.29	-0.0309	0.798	0.125	0.00116	0.00818	0.128	0.126	0.929	0.934	0.931
Mrpl42	4.79	-0.0694	0.181	0.0812	0.00182	0.0083	0.129	0.126	0.929	0.934	0.931
Sp4	4.56	-0.124	0.00305	0.0783	0.00188	0.00832	0.127	0.127	0.929	0.934	0.931
Tjp3	0.296	0.0771	0.877	-0.469	-0.000317	0.00811	0.122	0.127	0.929	0.934	0.931
Mitd1	2.07	-0.0113	0.97	-0.227	-0.000665	0.00813	0.124	0.127	0.929	0.934	0.931
Agbl2	0.695	0.198	0.407	-0.328	-0.000453	0.00811	0.127	0.127	0.929	0.934	0.931
Tmem189	4.62	0.007	0.966	-0.126	-0.00121	0.00819	0.121	0.129	0.929	0.934	0.931
Gja4	1.23	0.312	0.0262	0.248	0.000589	0.00812	0.125	0.129	0.929	0.934	0.931
Zfp354a	3.09	-0.159	0.0569	-0.144	-0.00102	0.00816	0.124	0.129	0.929	0.934	0.931
Klf10	4.72	-0.0291	0.864	-0.164	-0.000923	0.00815	0.123	0.129	0.929	0.934	0.931
Gpr101	4.49	-0.0515	0.792	0.201	0.00075	0.00813	0.131	0.129	0.929	0.934	0.931
Zic3	1.27	-0.391	0.023	-0.302	-0.000494	0.00811	0.126	0.129	0.929	0.934	0.931
Pltp	5.7	0.0445	0.643	-0.113	-0.00135	0.00821	0.125	0.13	0.929	0.934	0.931
Lama3	2.81	-0.0429	0.797	0.176	0.00083	0.00814	0.131	0.13	0.929	0.934	0.931
Ccdc96	1.32	-0.0265	0.92	0.229	0.000644	0.00813	0.126	0.131	0.929	0.934	0.931
Dut	4.25	-0.0438	0.484	0.0828	0.00173	0.00828	0.124	0.131	0.929	0.934	0.931
Ddhd1	5.32	0.112	0.0346	-0.0933	-0.00164	0.00826	0.122	0.131	0.929	0.934	0.931
RP23-418M3.4	0.829	0.0262	0.962	-0.423	-0.00035	0.00811	0.128	0.131	0.929	0.934	0.931
Ccdc28b	3.43	-0.0696	0.433	0.123	0.00123	0.00819	0.123	0.131	0.929	0.934	0.931
Ddx51	4.56	0.0856	0.144	-0.094	-0.00159	0.00826	0.124	0.132	0.929	0.934	0.931
Pld1	3.08	0.0191	0.9	-0.138	-0.00107	0.00817	0.129	0.133	0.929	0.934	0.931
Rbm7	3.95	-0.033	0.877	-0.198	-0.000742	0.00813	0.131	0.133	0.929	0.934	0.931
Ccng2	5.01	-0.111	0.0323	-0.0916	-0.00162	0.00826	0.121	0.134	0.929	0.934	0.931
Lpar1	4.36	-0.00506	0.972	-0.109	-0.00136	0.00821	0.126	0.134	0.929	0.934	0.931
Igfbp4	5.67	0.000735	0.995	-0.0913	-0.00164	0.00826	0.123	0.135	0.929	0.934	0.931
Lurap1l	4.71	0.0293	0.774	-0.108	-0.00136	0.00821	0.124	0.137	0.929	0.934	0.931
Cdh24	4.51	0.0358	0.796	-0.143	-0.00103	0.00816	0.127	0.137	0.929	0.934	0.931
G2e3	4.02	-0.0709	0.268	-0.0949	-0.00152	0.00824	0.121	0.137	0.929	0.934	0.931
Cd33	3	0.12	0.182	-0.137	-0.00106	0.00817	0.132	0.137	0.929	0.934	0.931
Zfp334	5.1	-0.0343	0.559	-0.0743	-0.00198	0.00833	0.122	0.137	0.929	0.934	0.931
Rras2	3.8	0.0412	0.692	-0.119	-0.00123	0.00819	0.122	0.138	0.929	0.934	0.931
Ackr3	3.81	0.0785	0.417	-0.132	-0.0011	0.00817	0.126	0.138	0.929	0.934	0.931
Spata13	4.03	0.135	0.138	-0.143	-0.00101	0.00816	0.13	0.138	0.929	0.934	0.931
Rorb	4.34	-0.0122	0.921	-0.107	-0.00137	0.00821	0.122	0.138	0.929	0.934	0.931
Hbb-bt	3.98	-0.0877	0.822	0.434	0.000353	0.00811	0.131	0.139	0.929	0.934	0.931
Ccnb2	0.162	-0.22	0.41	-0.379	-0.000363	0.00811	0.123	0.14	0.929	0.934	0.931
Kmt2a	8.32	0.0125	0.823	-0.0572	-0.0026	0.00849	0.122	0.14	0.929	0.934	0.931
Il16	5.47	0.0369	0.769	-0.132	-0.0011	0.00817	0.128	0.14	0.929	0.934	0.931
Tmem67	3.87	-0.109	0.22	-0.136	-0.00106	0.00817	0.128	0.141	0.929	0.934	0.931
Zfp322a	5.32	-0.142	0.000292	-0.0769	-0.00189	0.00831	0.125	0.141	0.929	0.934	0.931
Cdca7l	1.18	0.149	0.418	-0.25	-0.000562	0.00812	0.127	0.141	0.929	0.934	0.931
Tmem107	2.52	-0.105	0.339	0.157	0.000879	0.00815	0.129	0.141	0.929	0.934	0.931
Muc3a	3.51	0.117	0.17	-0.134	-0.00106	0.00817	0.128	0.142	0.929	0.934	0.931
Cramp1l	5.95	0.019	0.731	-0.0597	-0.0024	0.00844	0.13	0.143	0.929	0.934	0.931
Adipor2	5.86	0.0625	0.287	-0.0868	-0.00167	0.00827	0.124	0.143	0.929	0.934	0.931
Lsm11	5.87	0.0783	0.261	-0.102	-0.0014	0.00822	0.129	0.143	0.929	0.934	0.931
Mrps28	2.58	-0.0546	0.671	0.149	0.000915	0.00815	0.126	0.144	0.929	0.934	0.931
Pwwp2b	4.77	0.0941	0.19	-0.111	-0.0013	0.0082	0.125	0.144	0.929	0.934	0.931
Arhgef5	1.75	0.117	0.545	-0.246	-0.000569	0.00812	0.126	0.144	0.929	0.934	0.931
Zc3hav1l	3.48	-0.163	0.0128	-0.118	-0.0012	0.00819	0.124	0.144	0.929	0.934	0.931
Hpgd	2.28	-0.0329	0.85	-0.175	-0.000816	0.00814	0.127	0.144	0.929	0.934	0.931
Fam43b	4.68	-0.0801	0.176	-0.091	-0.00156	0.00824	0.125	0.144	0.929	0.934	0.931
Dcaf13	4.1	-0.0323	0.659	0.0848	0.00158	0.00825	0.131	0.145	0.929	0.934	0.931
Itch	6.23	0.00767	0.886	-0.0492	-0.00283	0.00855	0.131	0.145	0.929	0.934	0.931
Slc35a3	4.38	-0.0226	0.753	-0.0752	-0.00186	0.0083	0.131	0.146	0.929	0.934	0.931
Gsn	5.78	0.0646	0.203	-0.0791	-0.00182	0.0083	0.124	0.146	0.929	0.934	0.931
Ctsa	6.44	0.0446	0.174	-0.052	-0.00279	0.00854	0.121	0.146	0.929	0.934	0.931
RP23-464P12.1	1.55	0.205	0.337	-0.302	-0.000459	0.00811	0.132	0.146	0.929	0.934	0.931
Syt17	7.09	0.0548	0.277	-0.074	-0.00193	0.00832	0.128	0.148	0.929	0.934	0.931
Flt3	3.61	-0.0589	0.43	-0.1	-0.00134	0.00821	0.13	0.148	0.929	0.934	0.931
Drc1	3.84	-0.0132	0.908	-0.102	-0.00135	0.00821	0.13	0.148	0.929	0.934	0.931
Stom	3.7	-0.00767	0.96	-0.118	-0.00119	0.00818	0.122	0.148	0.929	0.934	0.931
Spen	6.93	-0.0166	0.805	-0.0682	-0.00208	0.00835	0.129	0.149	0.929	0.934	0.931
Sfrp1	2.28	0.0475	0.796	-0.194	-0.000716	0.00813	0.127	0.149	0.929	0.934	0.931
Gal3st1	2.91	0.037	0.792	-0.147	-0.000956	0.00815	0.125	0.15	0.929	0.934	0.931
RP23-403O11.1	3.03	-0.109	0.182	0.126	0.00107	0.00817	0.132	0.15	0.929	0.934	0.931
Sepw1	8.75	0.0481	0.259	-0.0637	-0.00223	0.00839	0.123	0.15	0.929	0.934	0.931
mt-Atp8	5.12	0.177	0.209	-0.208	-0.00065	0.00812	0.125	0.151	0.929	0.934	0.931
Gpr45	3.4	-0.000991	0.995	-0.12	-0.00115	0.00818	0.123	0.151	0.929	0.934	0.931
Rnf215	4.67	0.0152	0.827	-0.0715	-0.0019	0.00831	0.121	0.153	0.929	0.934	0.931
Magt1	4.09	0.0213	0.826	-0.0979	-0.00138	0.00821	0.128	0.153	0.929	0.934	0.931
Icam1	1.09	-0.0368	0.876	0.217	0.000594	0.00812	0.125	0.153	0.929	0.934	0.931
Ermard	4.81	-0.0206	0.774	-0.0773	-0.00177	0.00828	0.125	0.153	0.929	0.934	0.931
RP23-354A20.1	3.54	0.101	0.189	-0.12	-0.00116	0.00818	0.124	0.153	0.929	0.934	0.931
Tom1l1	4.38	0.0619	0.256	-0.083	-0.00165	0.00826	0.12	0.153	0.929	0.934	0.931
Col4a6	1.26	0.0572	0.829	-0.276	-0.000494	0.00811	0.125	0.155	0.929	0.934	0.931
Efnb3	7.39	0.0365	0.395	-0.0581	-0.00238	0.00842	0.131	0.156	0.929	0.934	0.931
Vmn1r49	0.359	0.209	0.306	-0.304	-0.000414	0.00811	0.131	0.157	0.929	0.934	0.931
Gm16485	3.8	-0.0146	0.89	-0.0989	-0.00137	0.00821	0.123	0.157	0.929	0.934	0.931
[truncated: 12,071 more rows]

## Sheet: ColumnDefinitions
Gene	Official gene symbol
logCPM	Mean expression level (log counts per million)
edgeR.stress.logFC	log2 foldchange upon stress estimated by edgeR (can be interpreted as the logFC in males upon stress)
edgeR.stress.FDR	FDR of the change upon stress estimated by edgeR
edgeR.interaction.logFC	sex:stress interaction foldchange estimated by edgeR (can be interpreted as an extra female-specific logFC upon stress, in addition to edgeR.stress.logFC)
DESeq2.interaction.logFC	sex:stress interaction foldchange estimated by DESeq2 with apeglm logFC shrinkage
DESeq2.interaction.logFC.stdErr	Standard error of the sex:stress interaction foldchange estimated by DESeq2
edgeR.interaction.PValue	Unadjusted p-value of the sex:stress interaction estimated by edgeR
DESeq2.interaction.PValue	Unadjusted p-value of the sex:stress interaction estimated by DESeq2
edgeR.interaction.FDR	Adjusted p-value of the sex:stress interaction estimated by edgeR
DESeq2.interaction.Padj	Adjusted p-value of the sex:stress interaction estimated by DESeq2
meanFDR	Mean of the FDR (i.e. adjusted p-value) estimated by the two methods
Note: All genes that passed count filtering are included in the table, although none passes genome-wide FDR.
